# Supplementary material
Source: PubMed Central journal article supplement (PMC4893961)

ALK

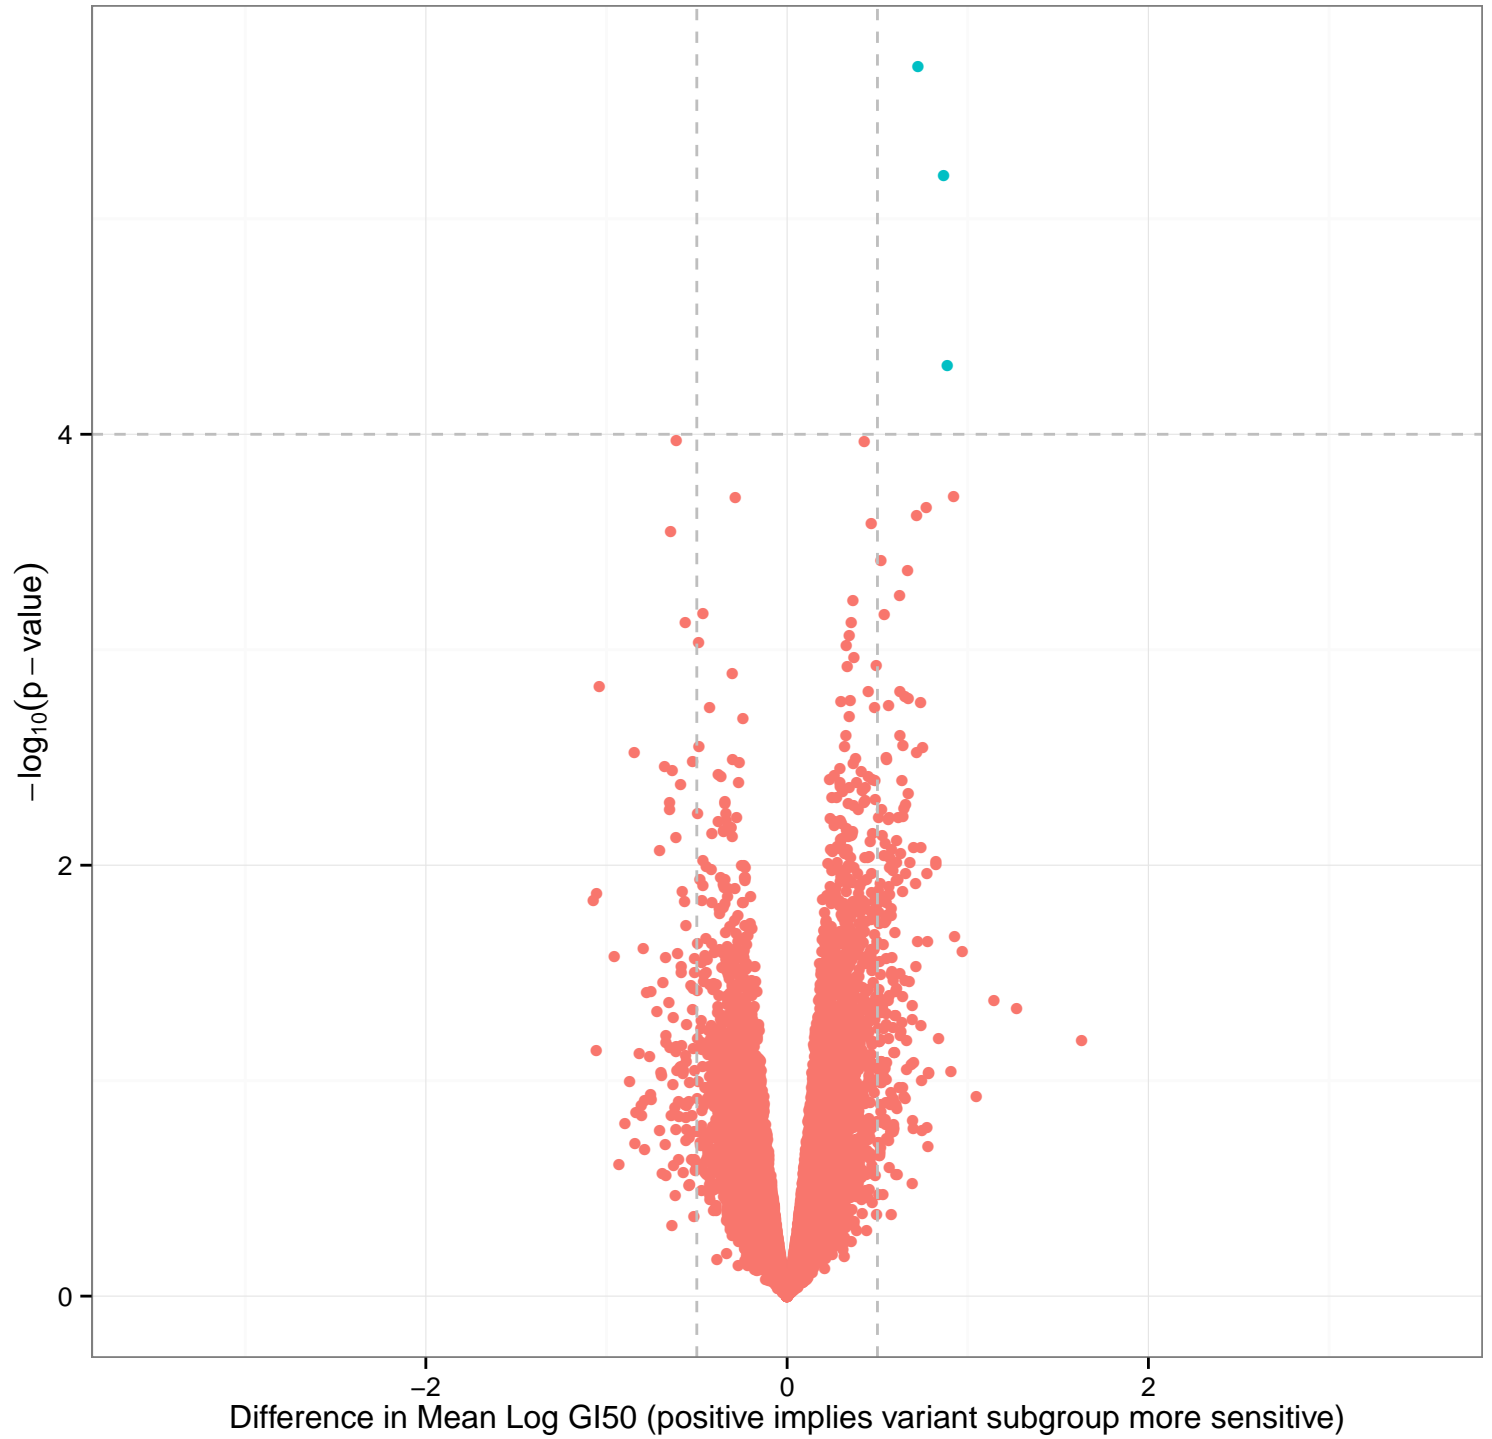



# ARID1A

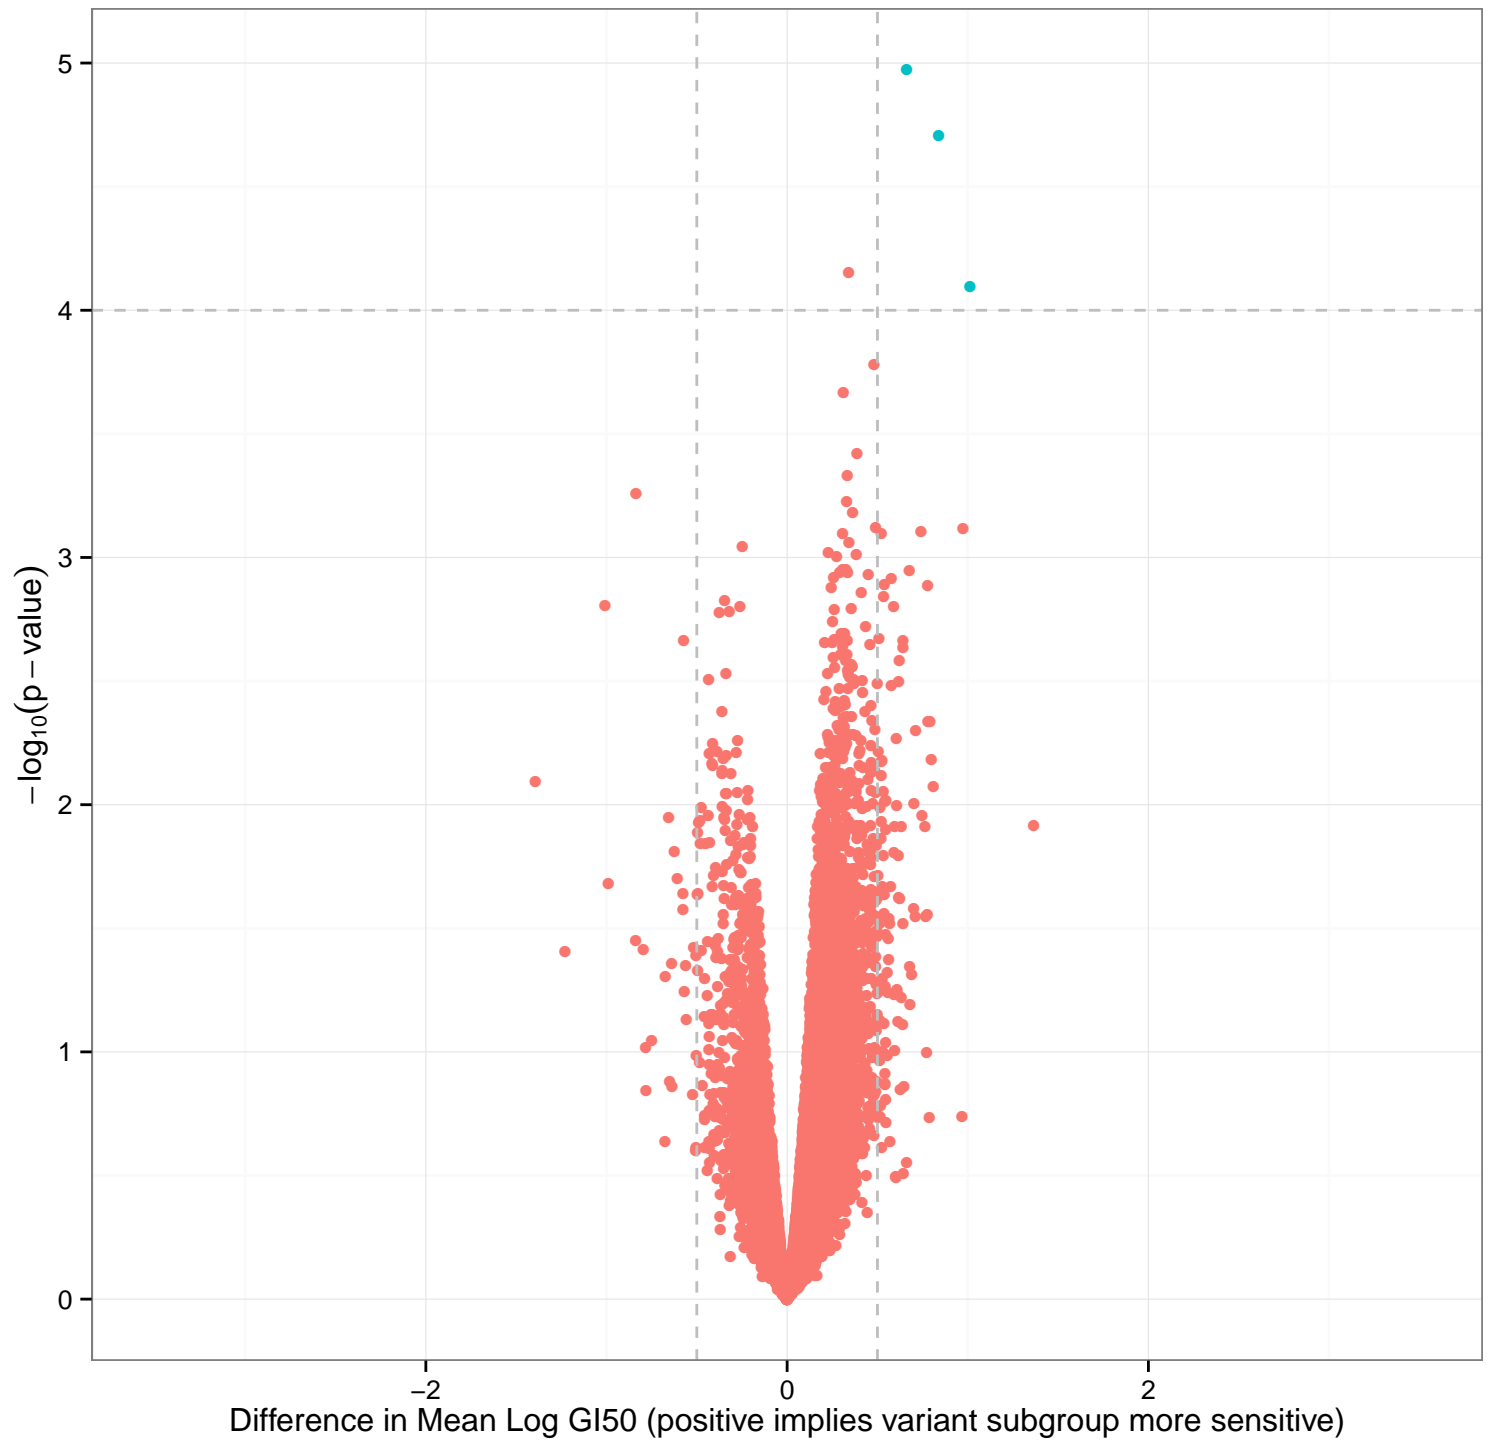

ATM

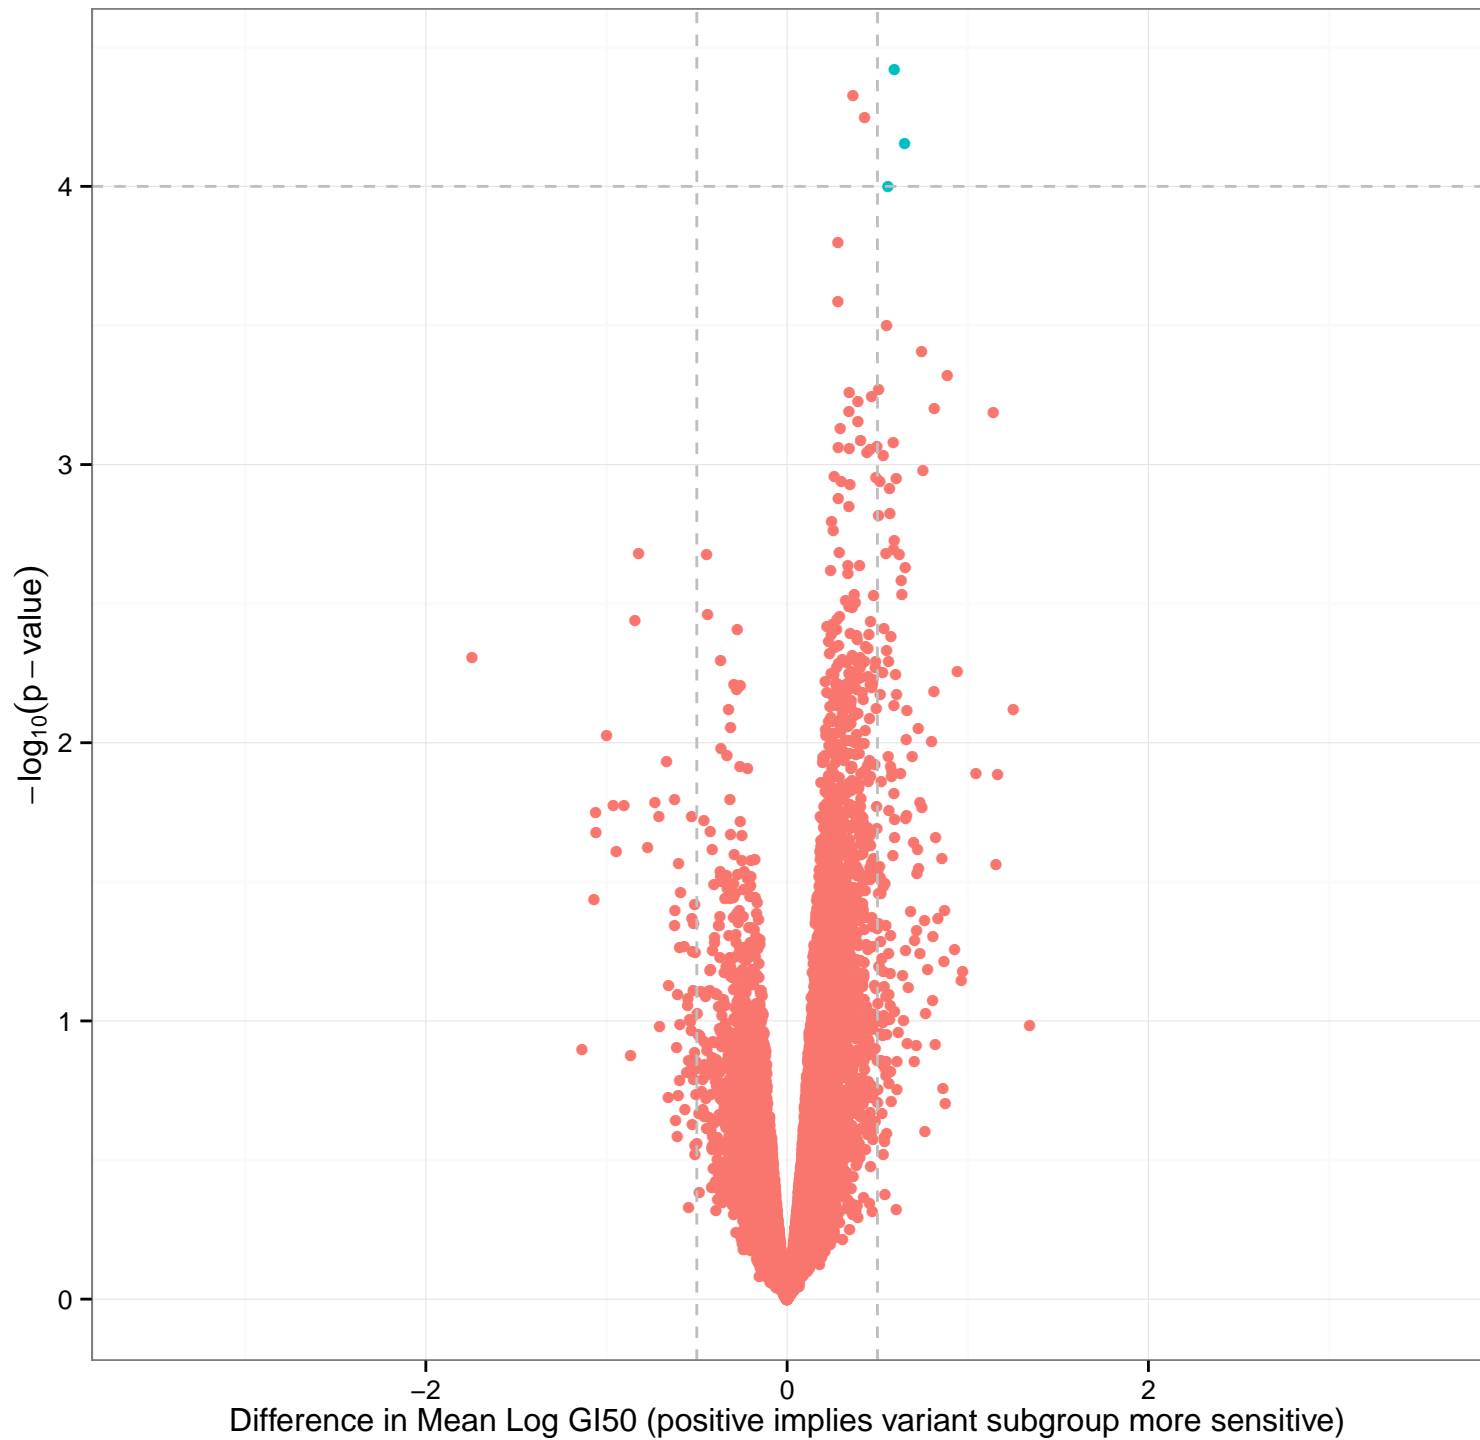

ATR

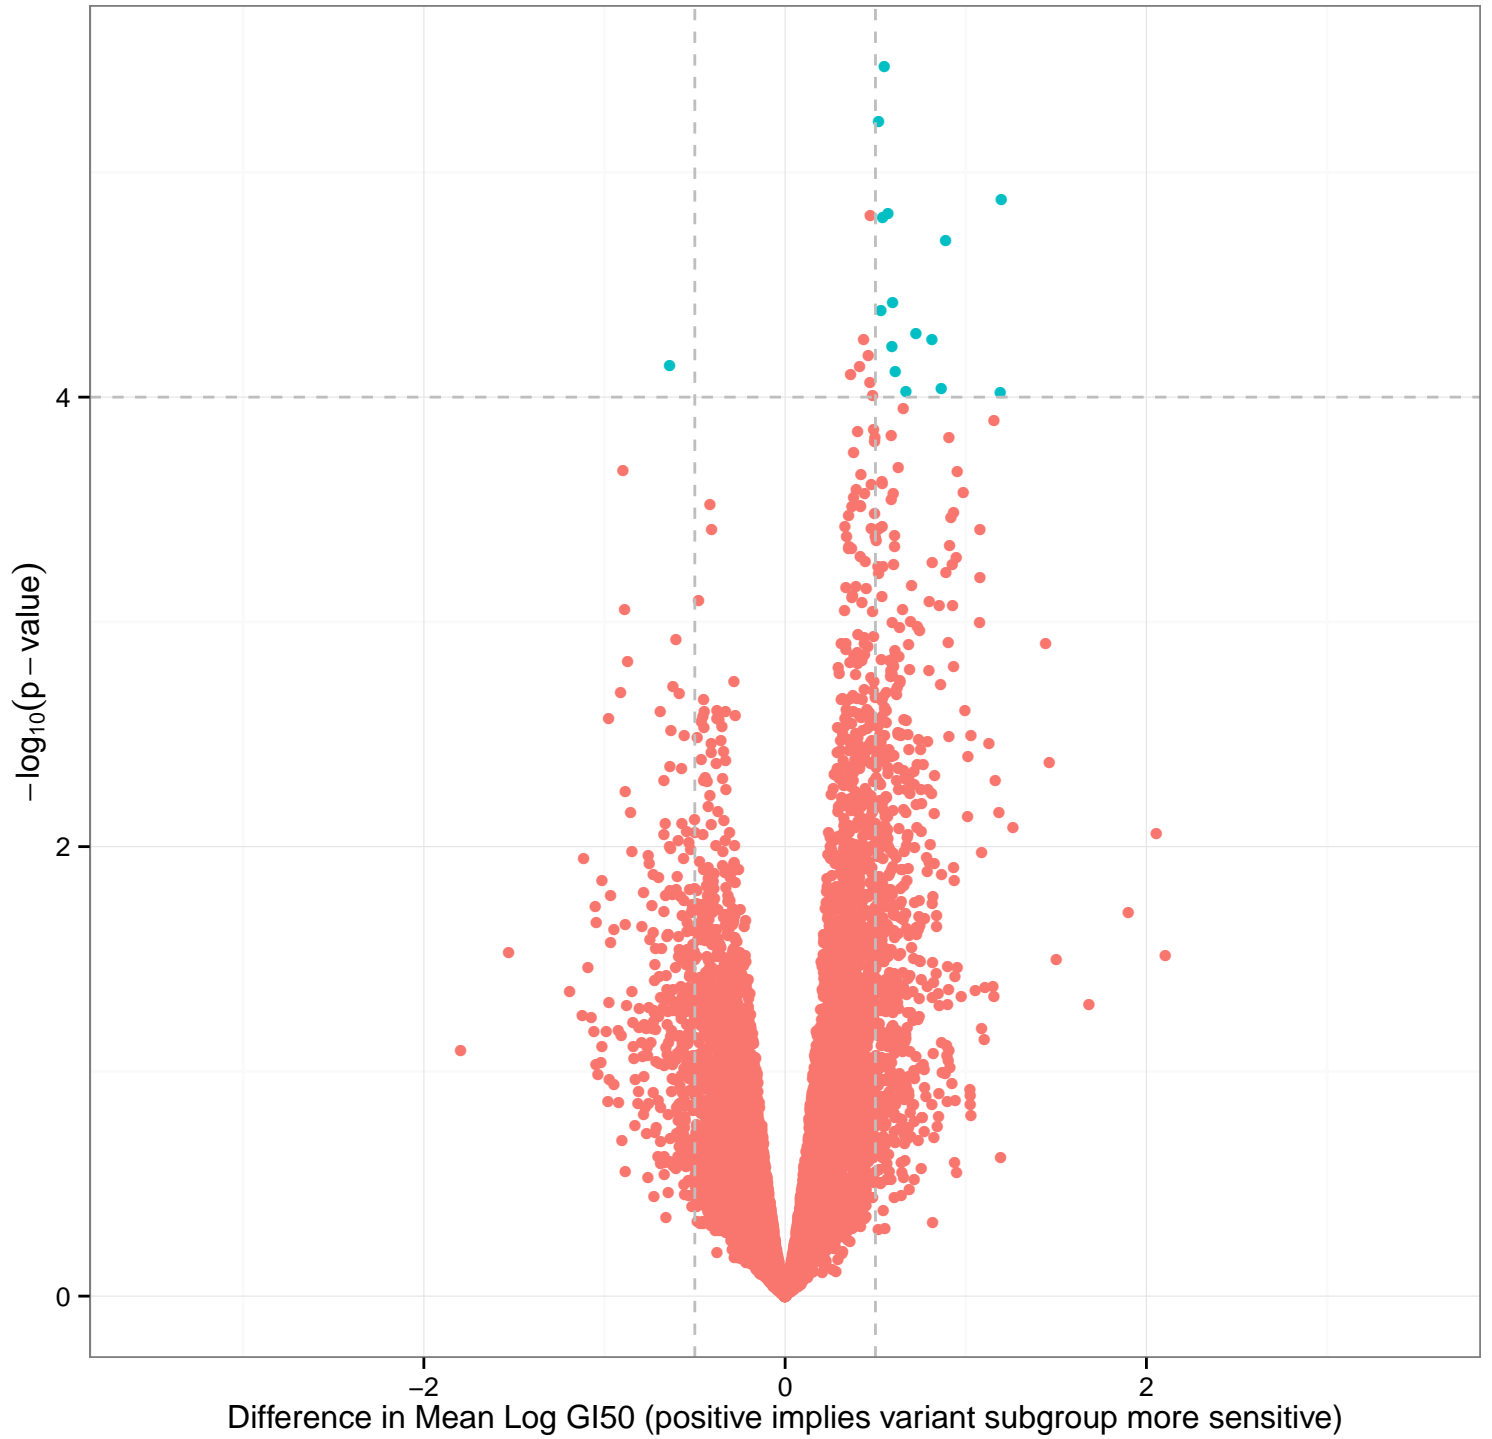

BRAF

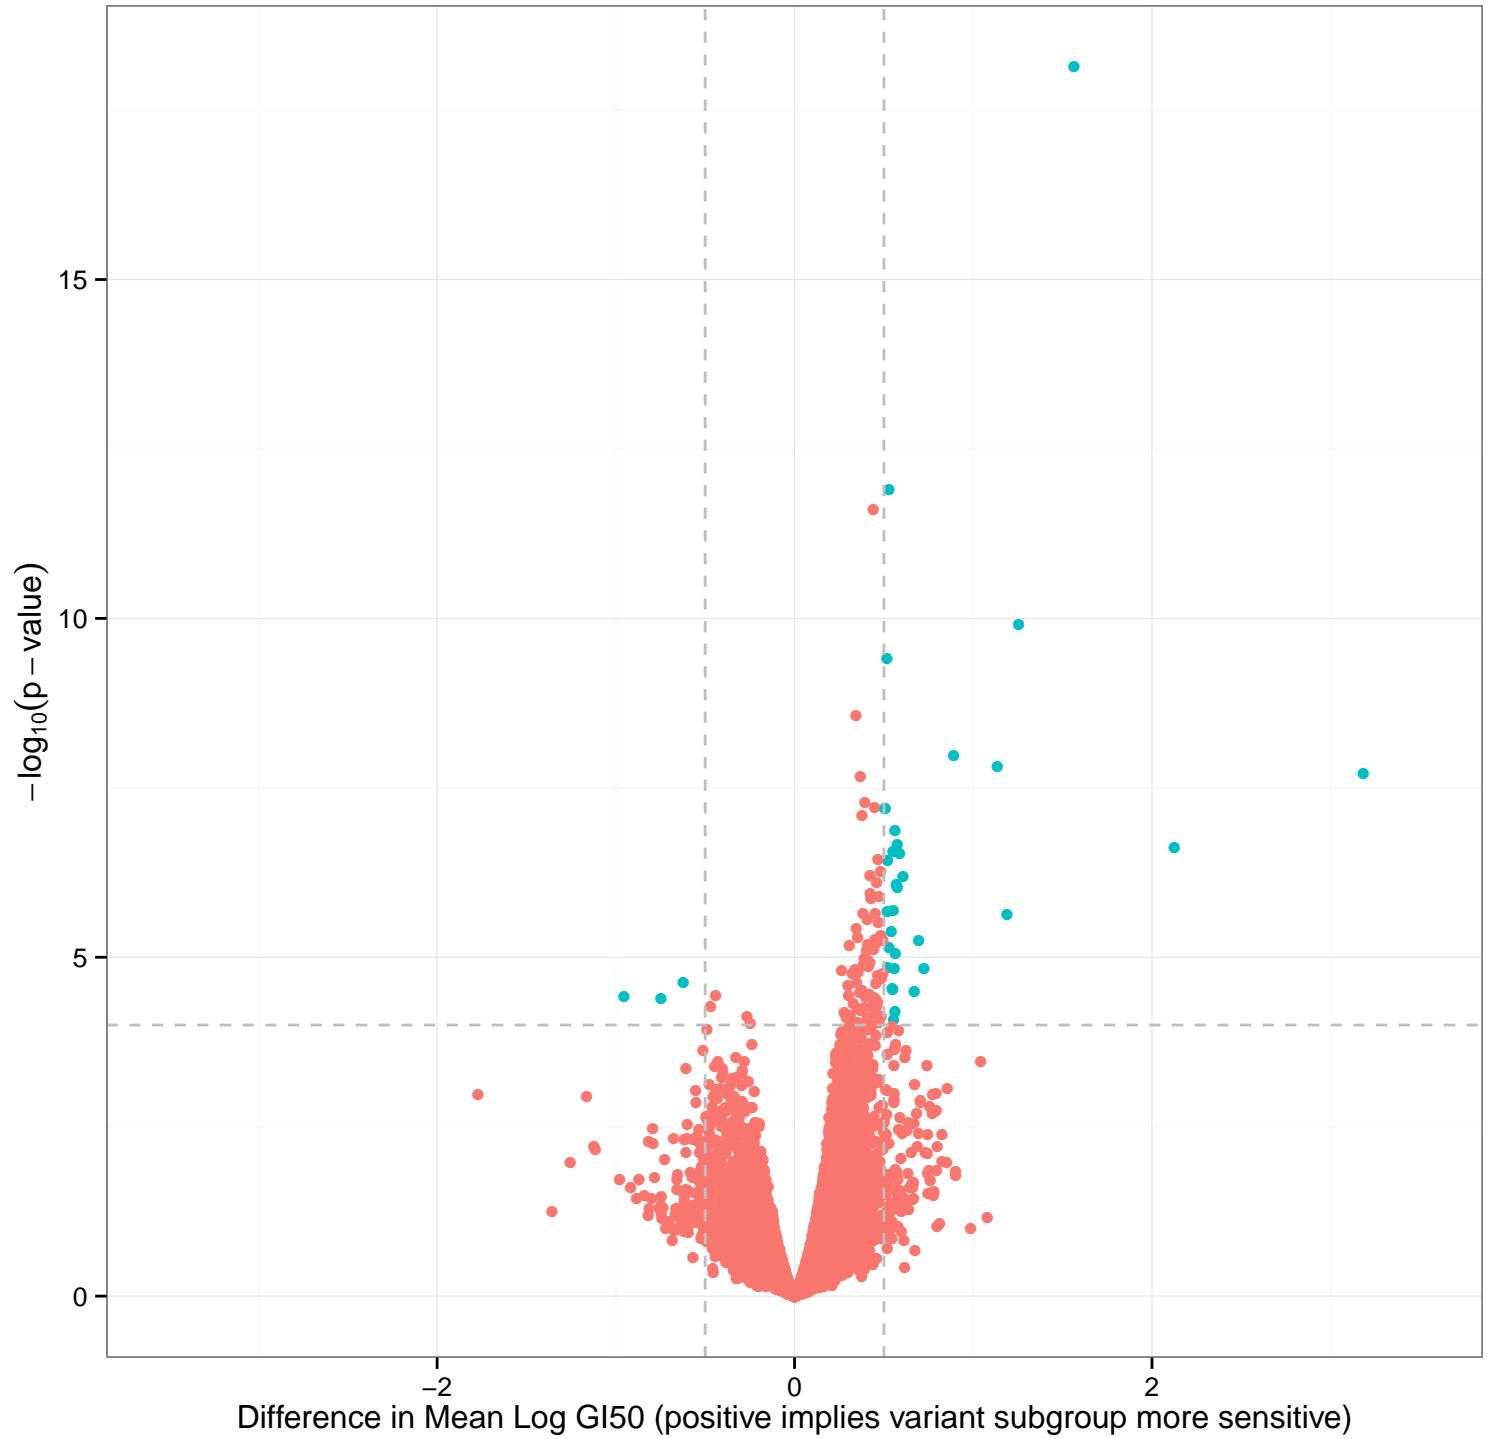

# BRCA1

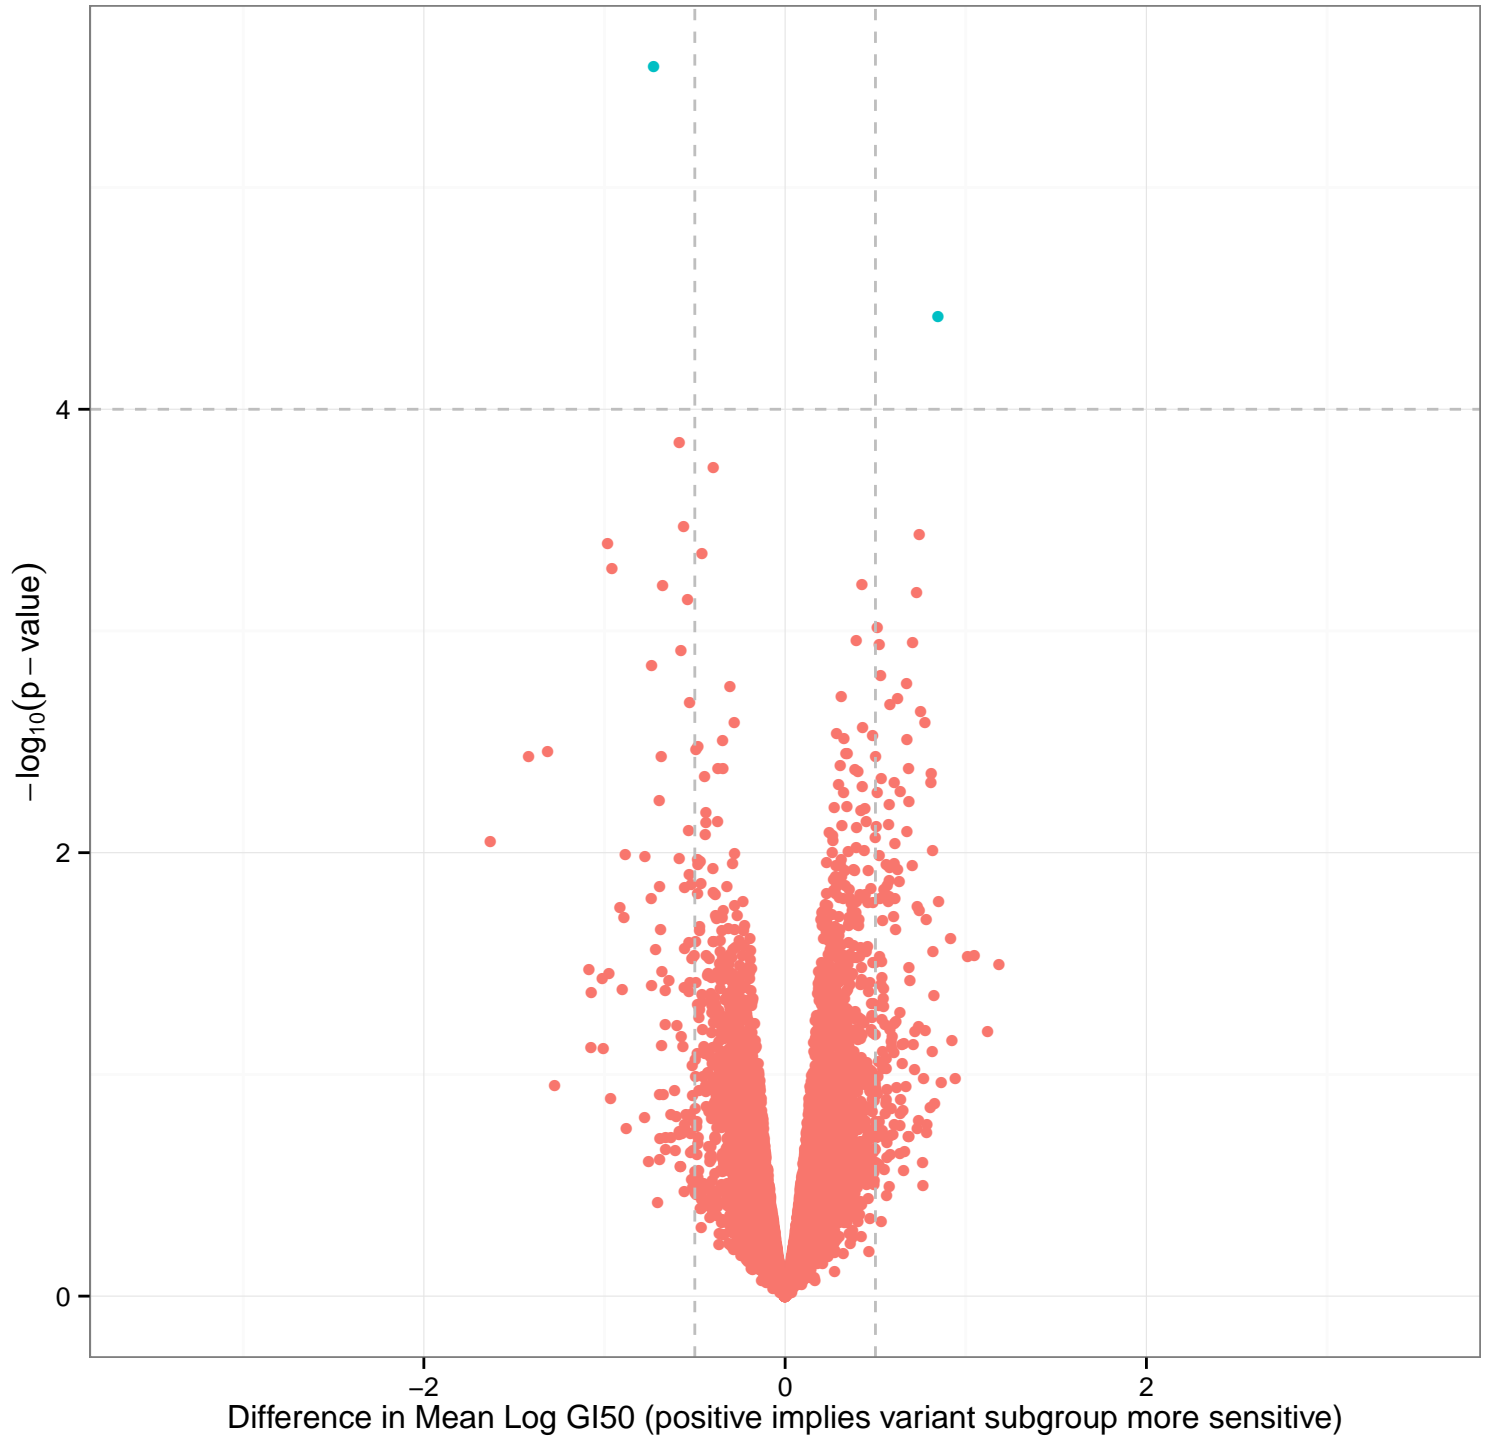

# CARD11

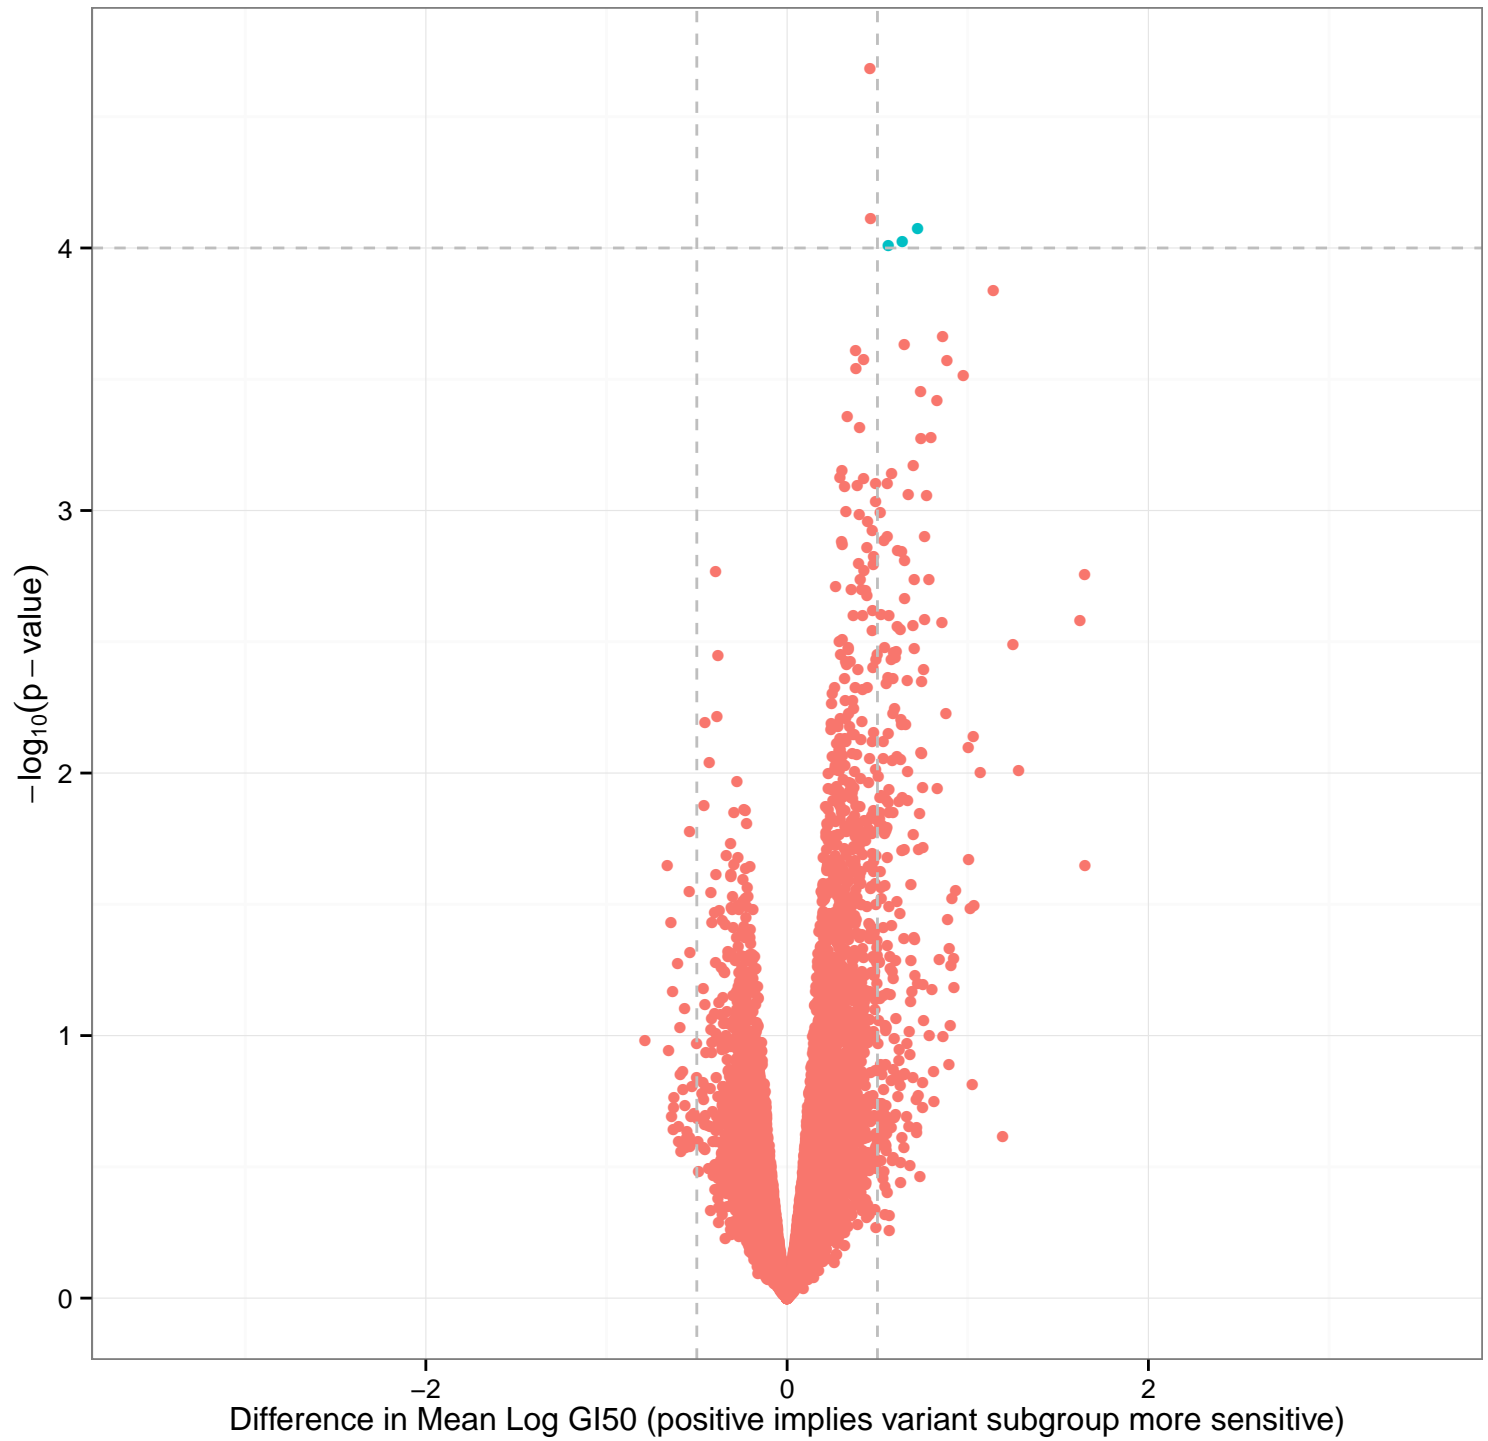



# CDH1

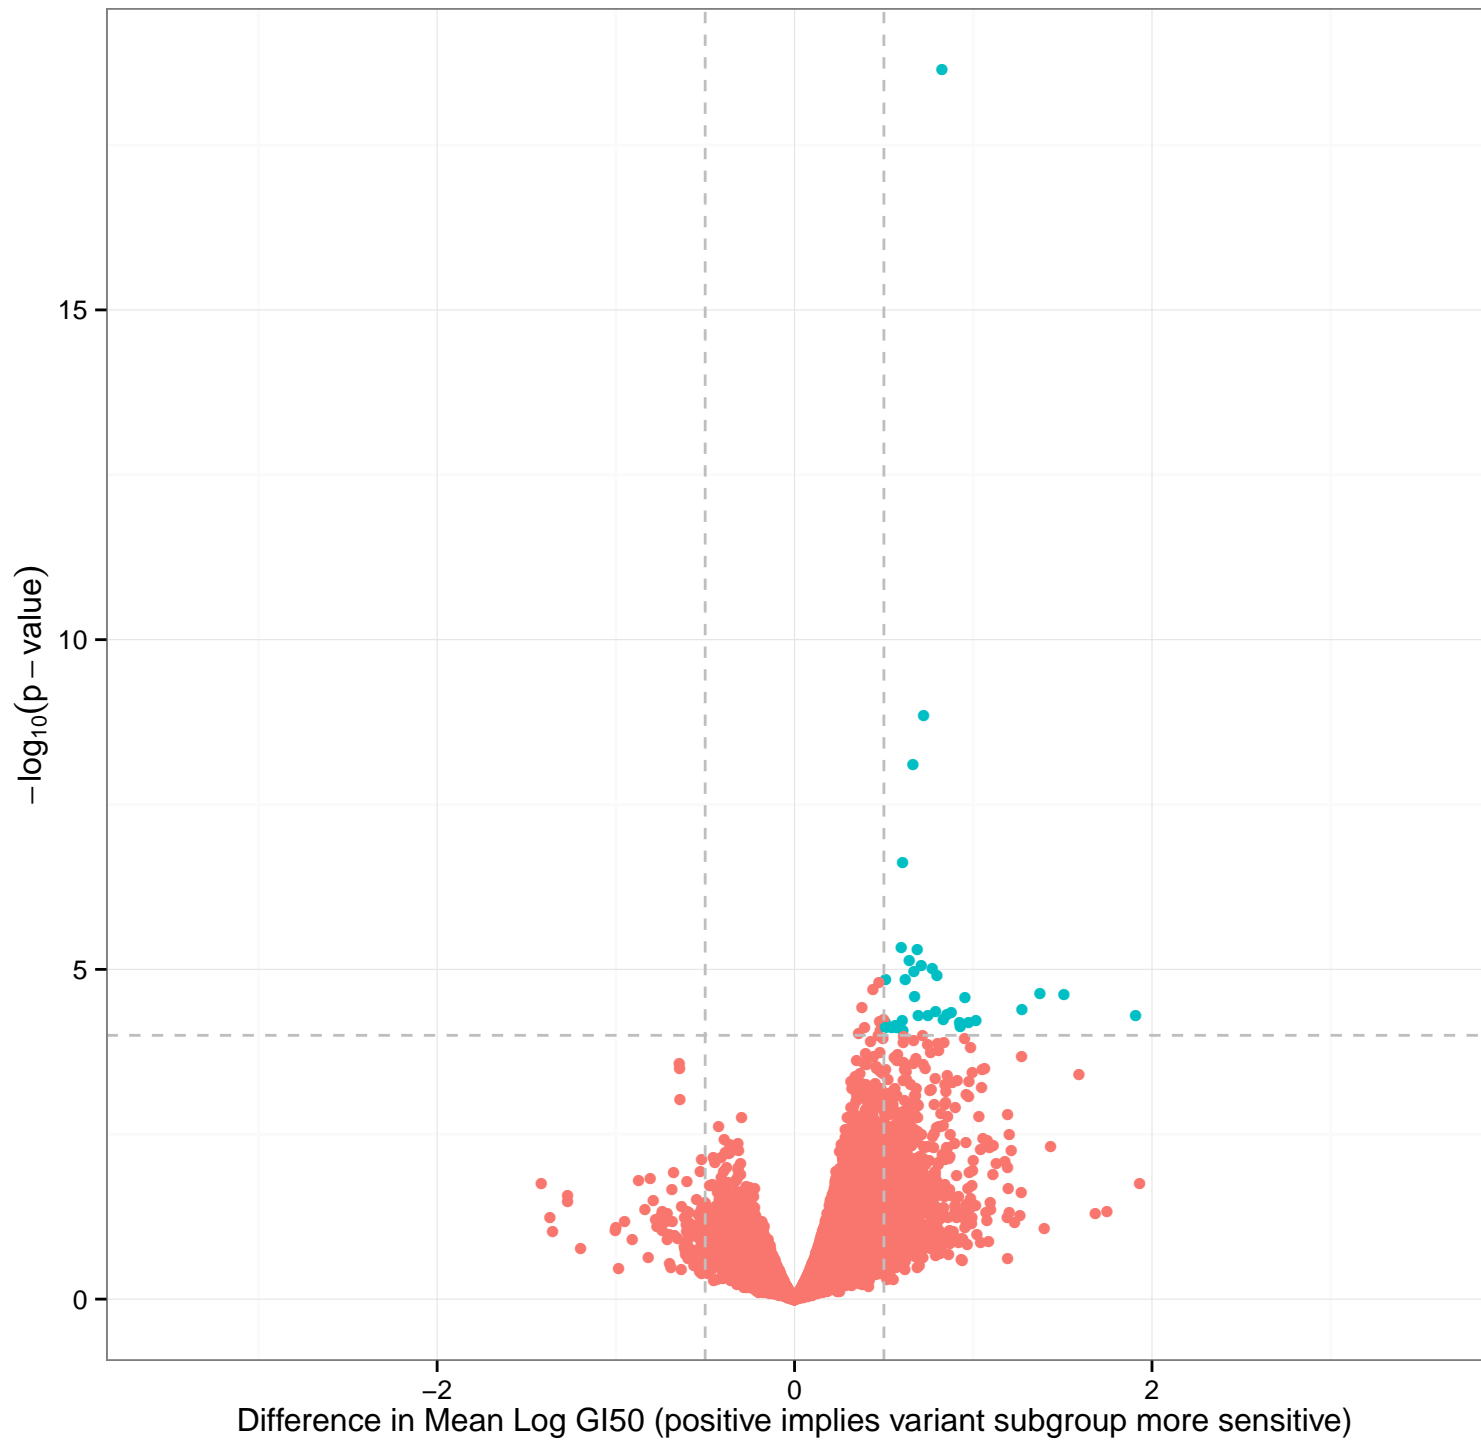

# CDH5

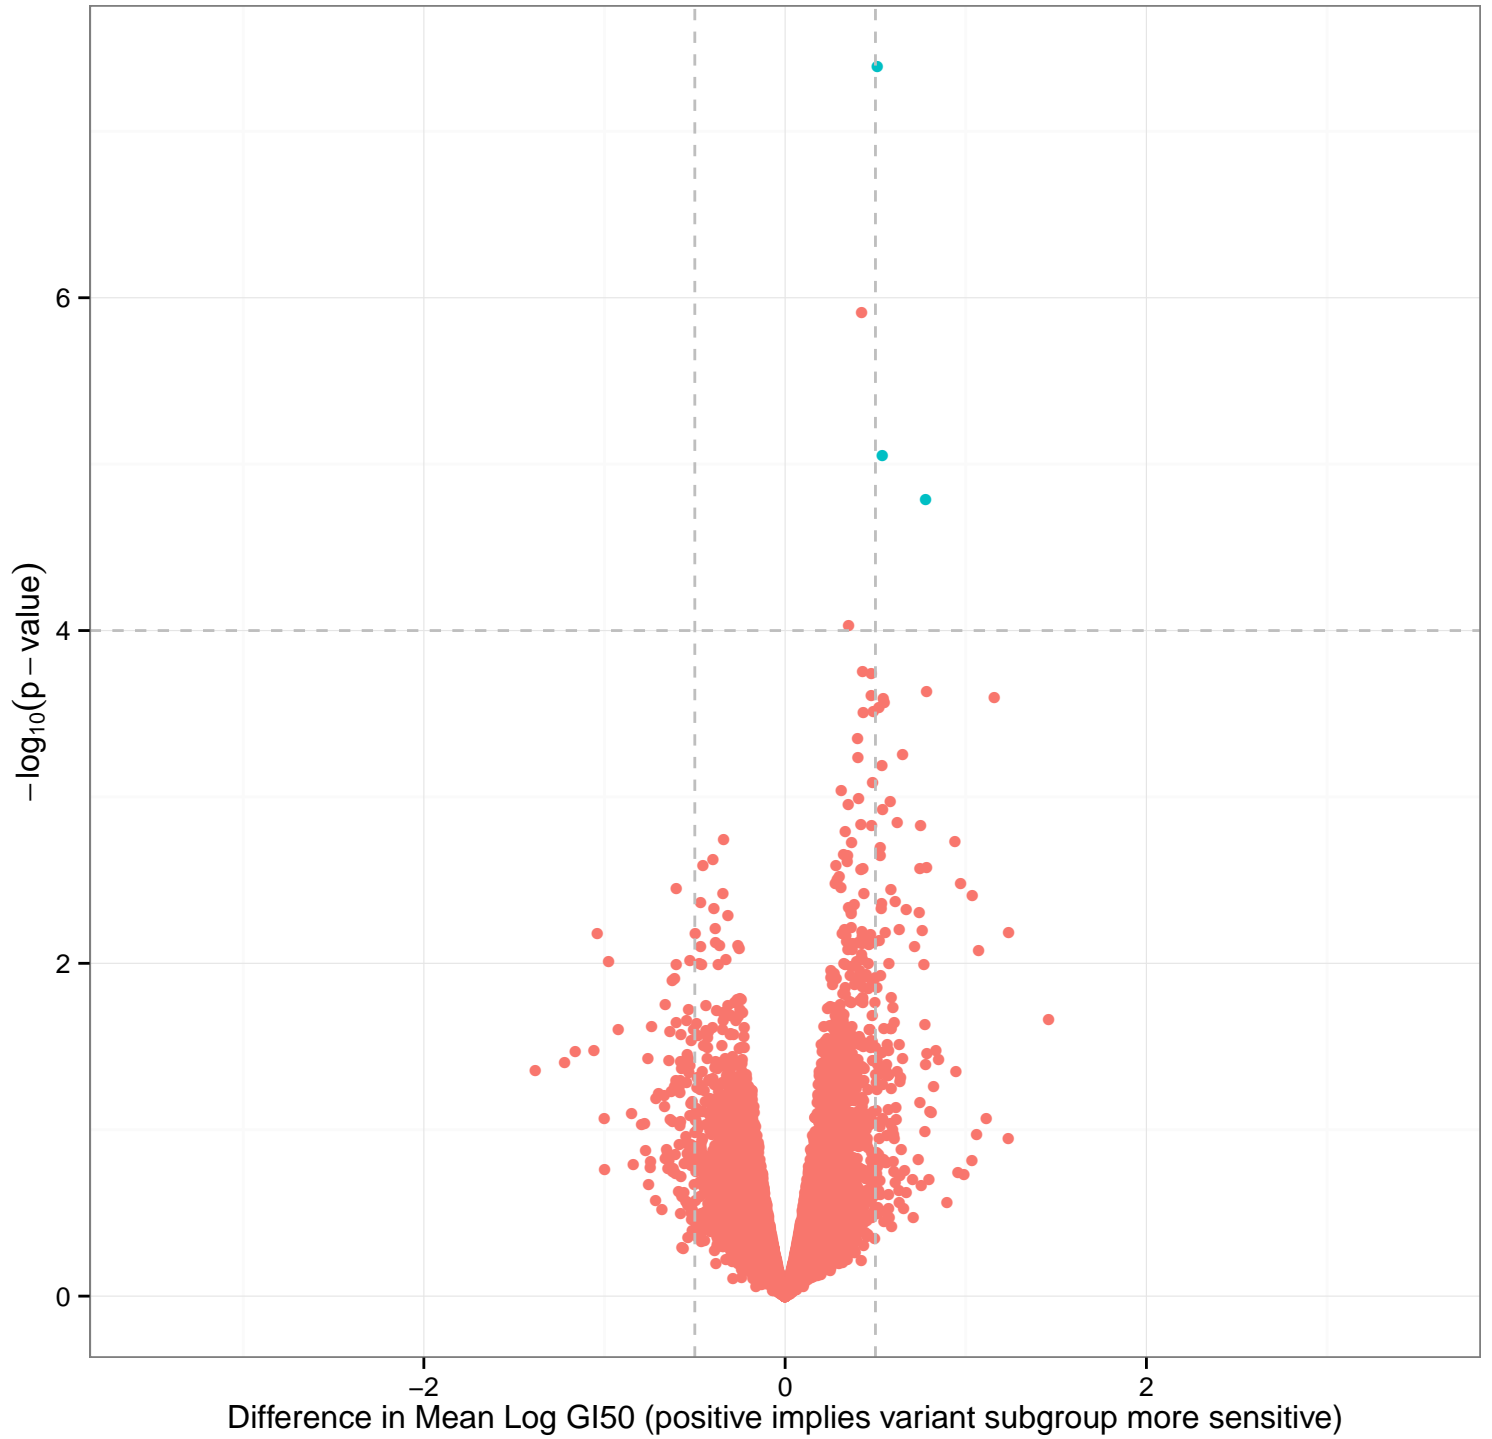

# CHD4

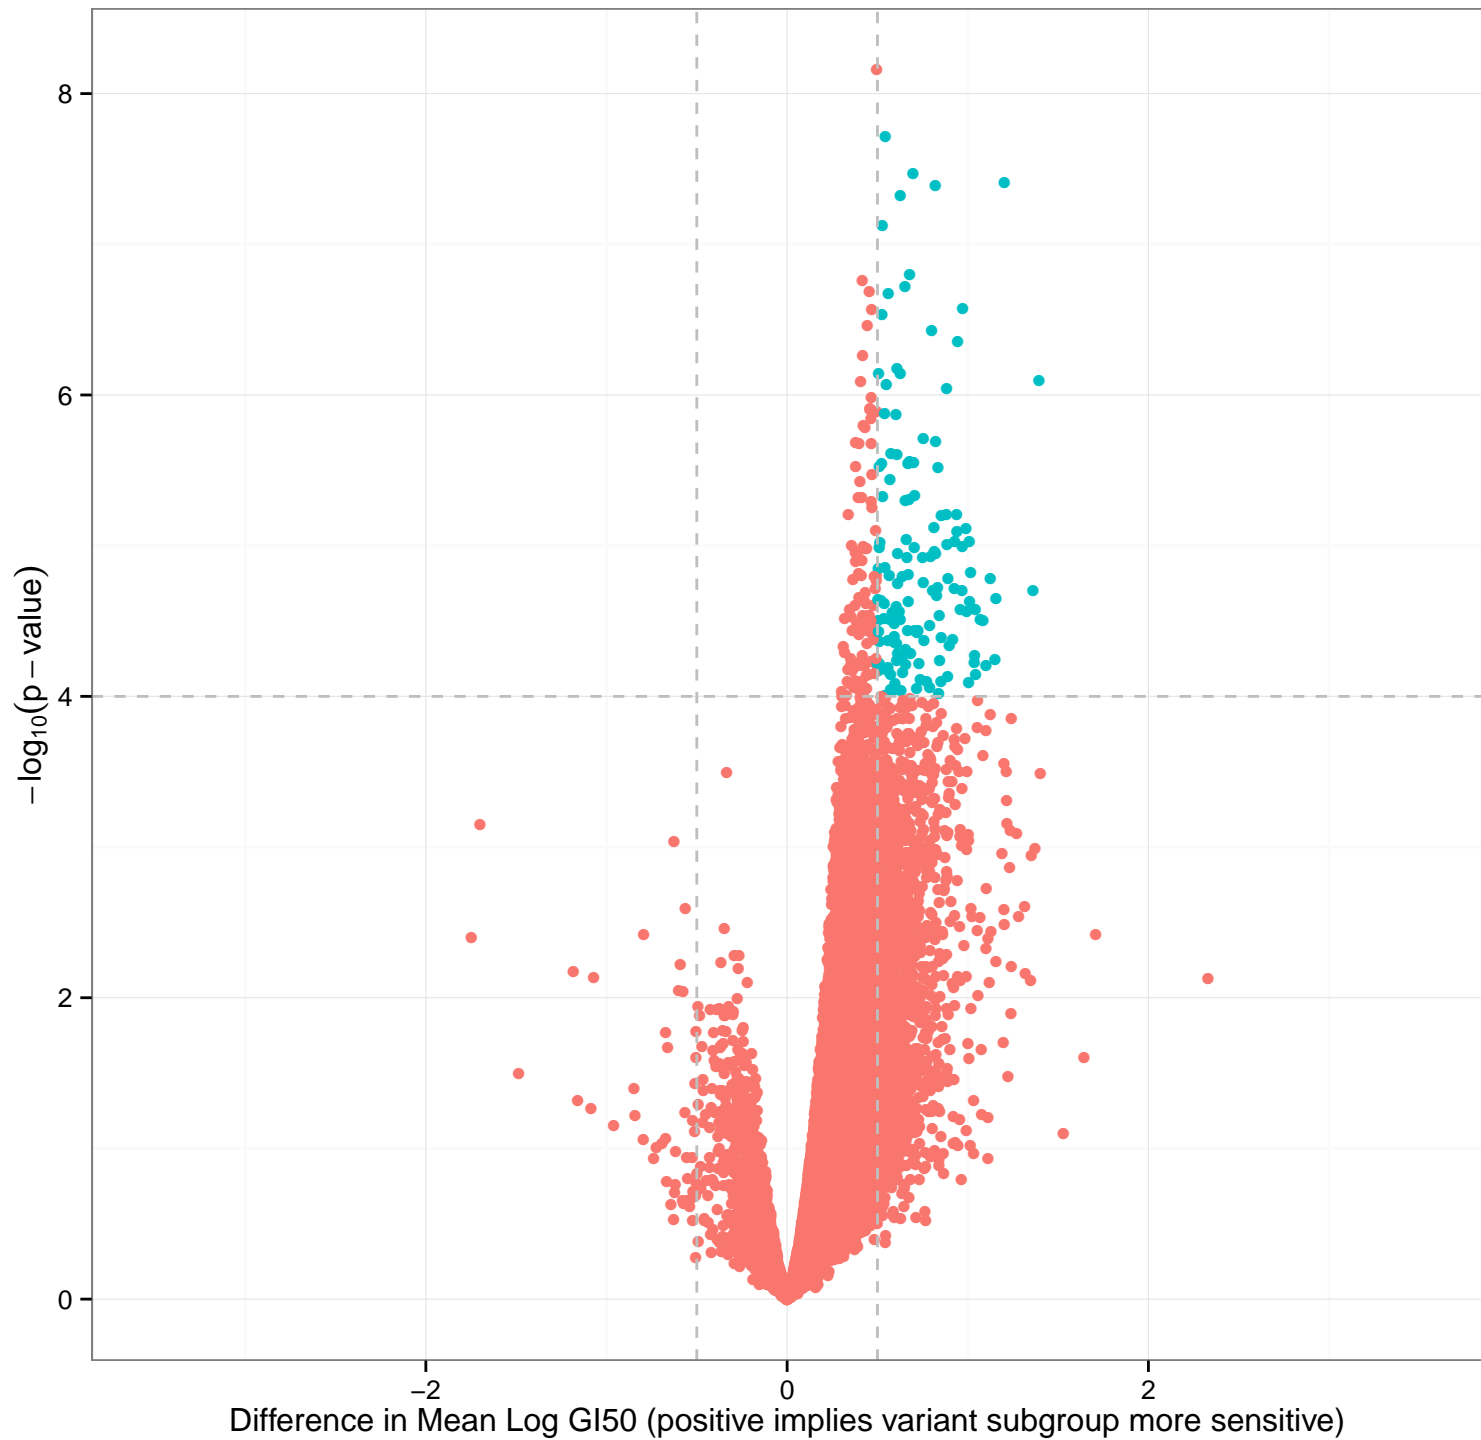

CNTRL

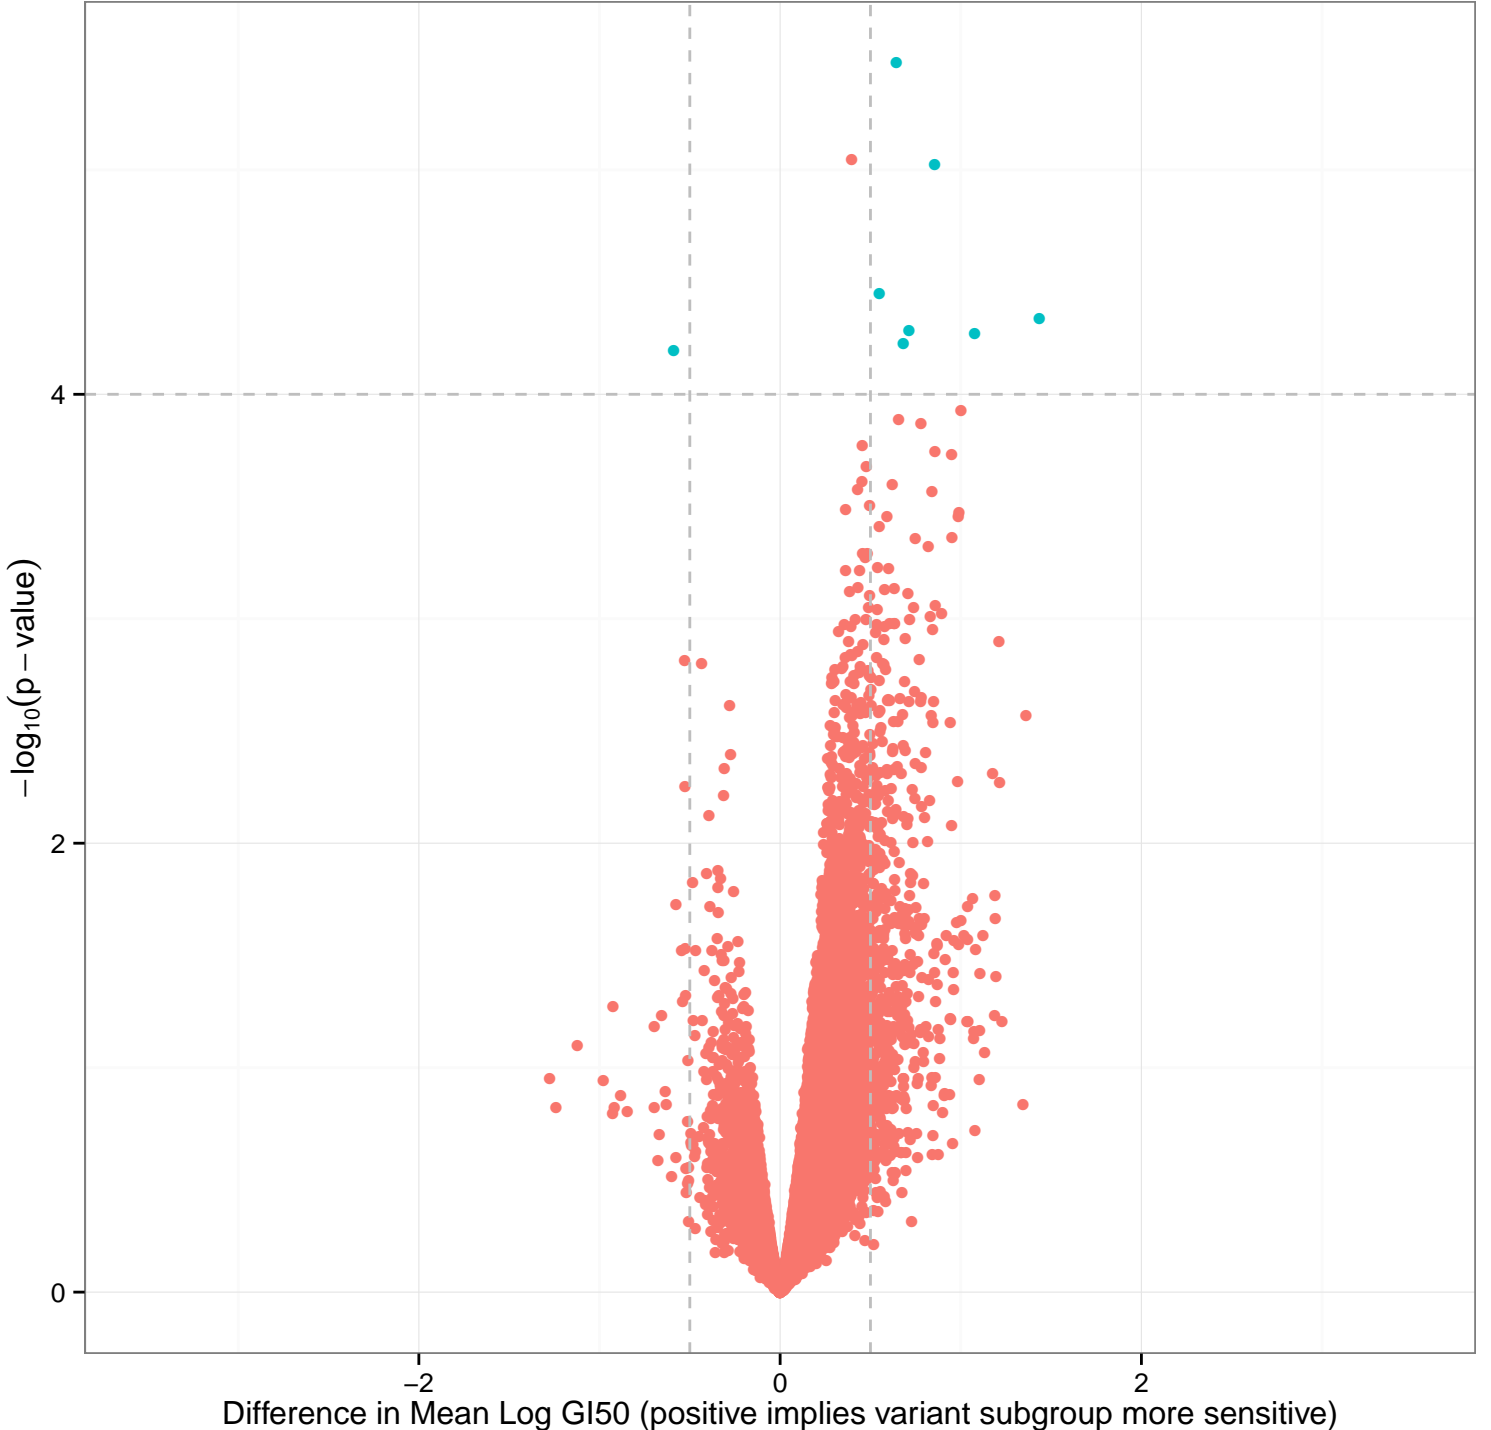

# DNMT3A

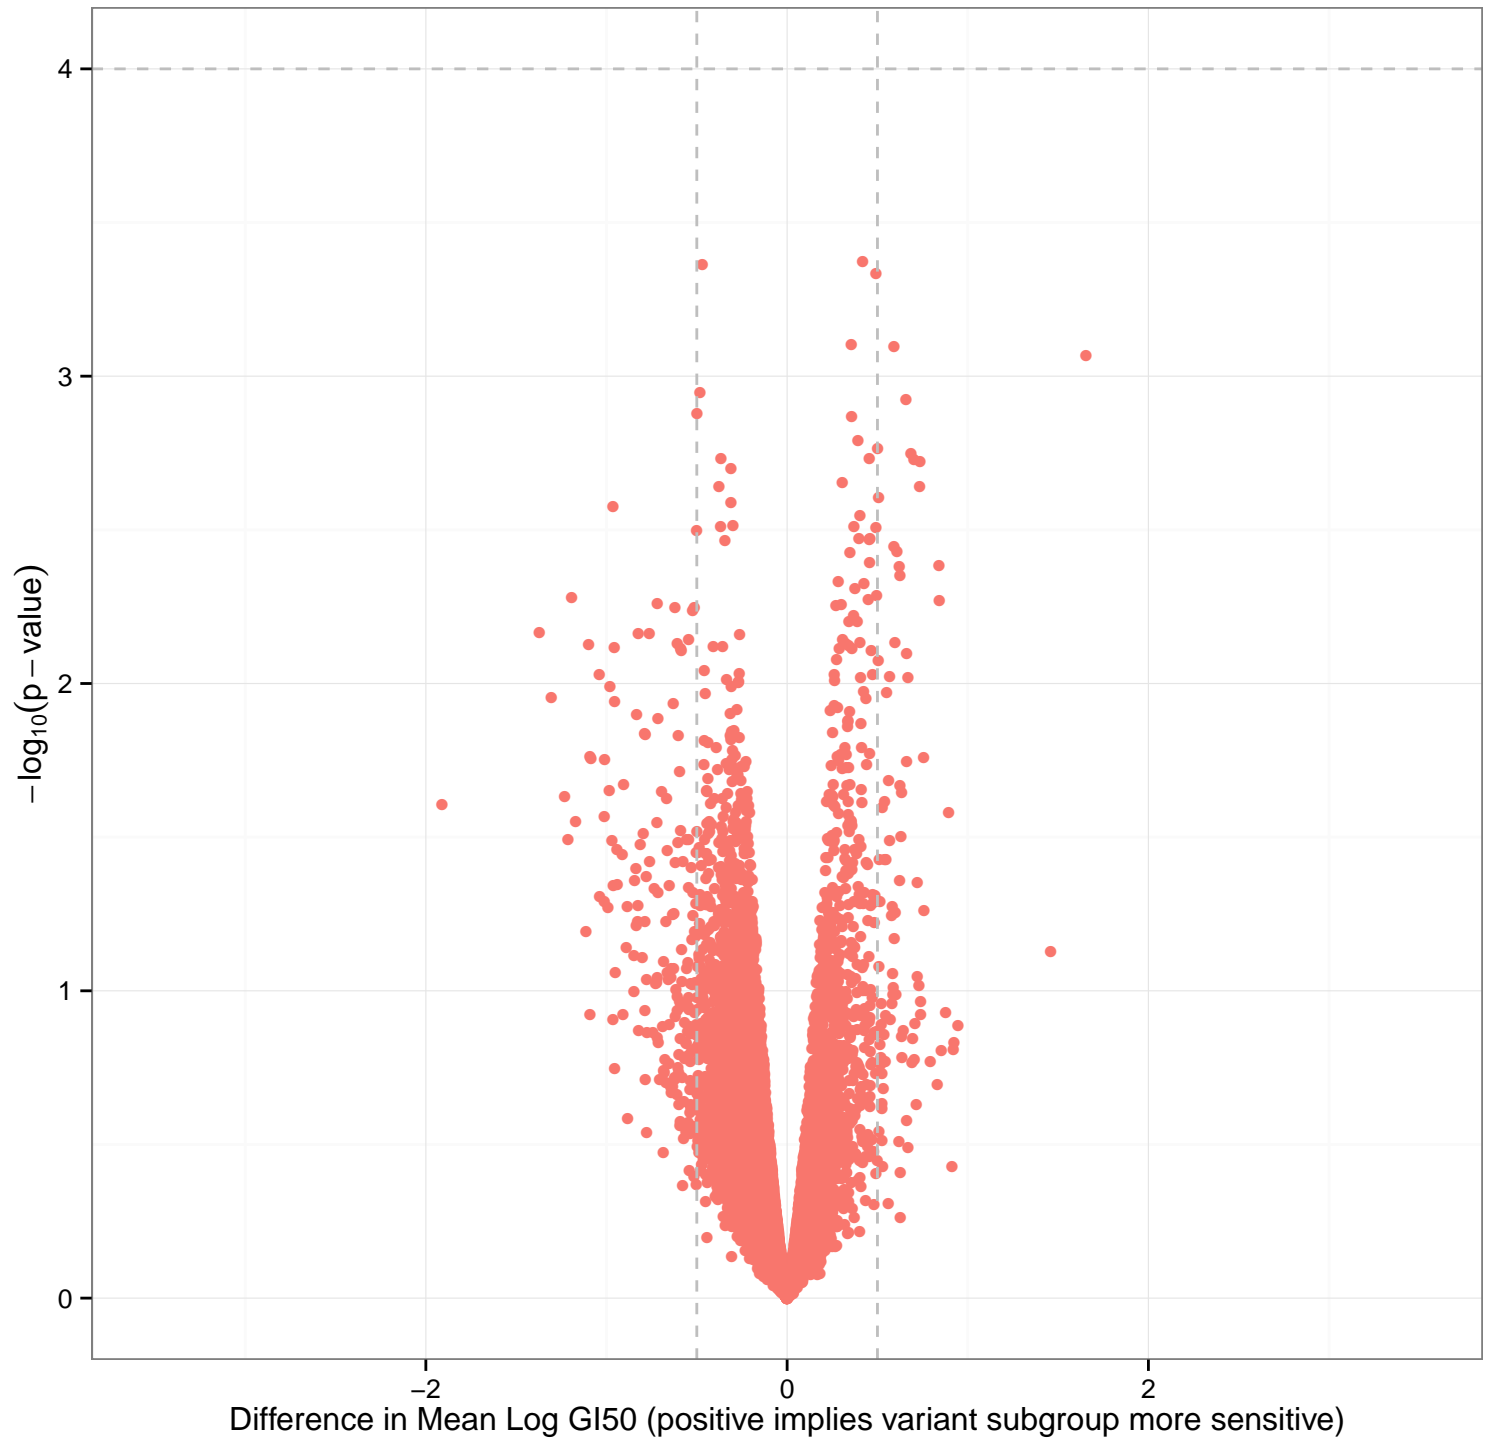

DST

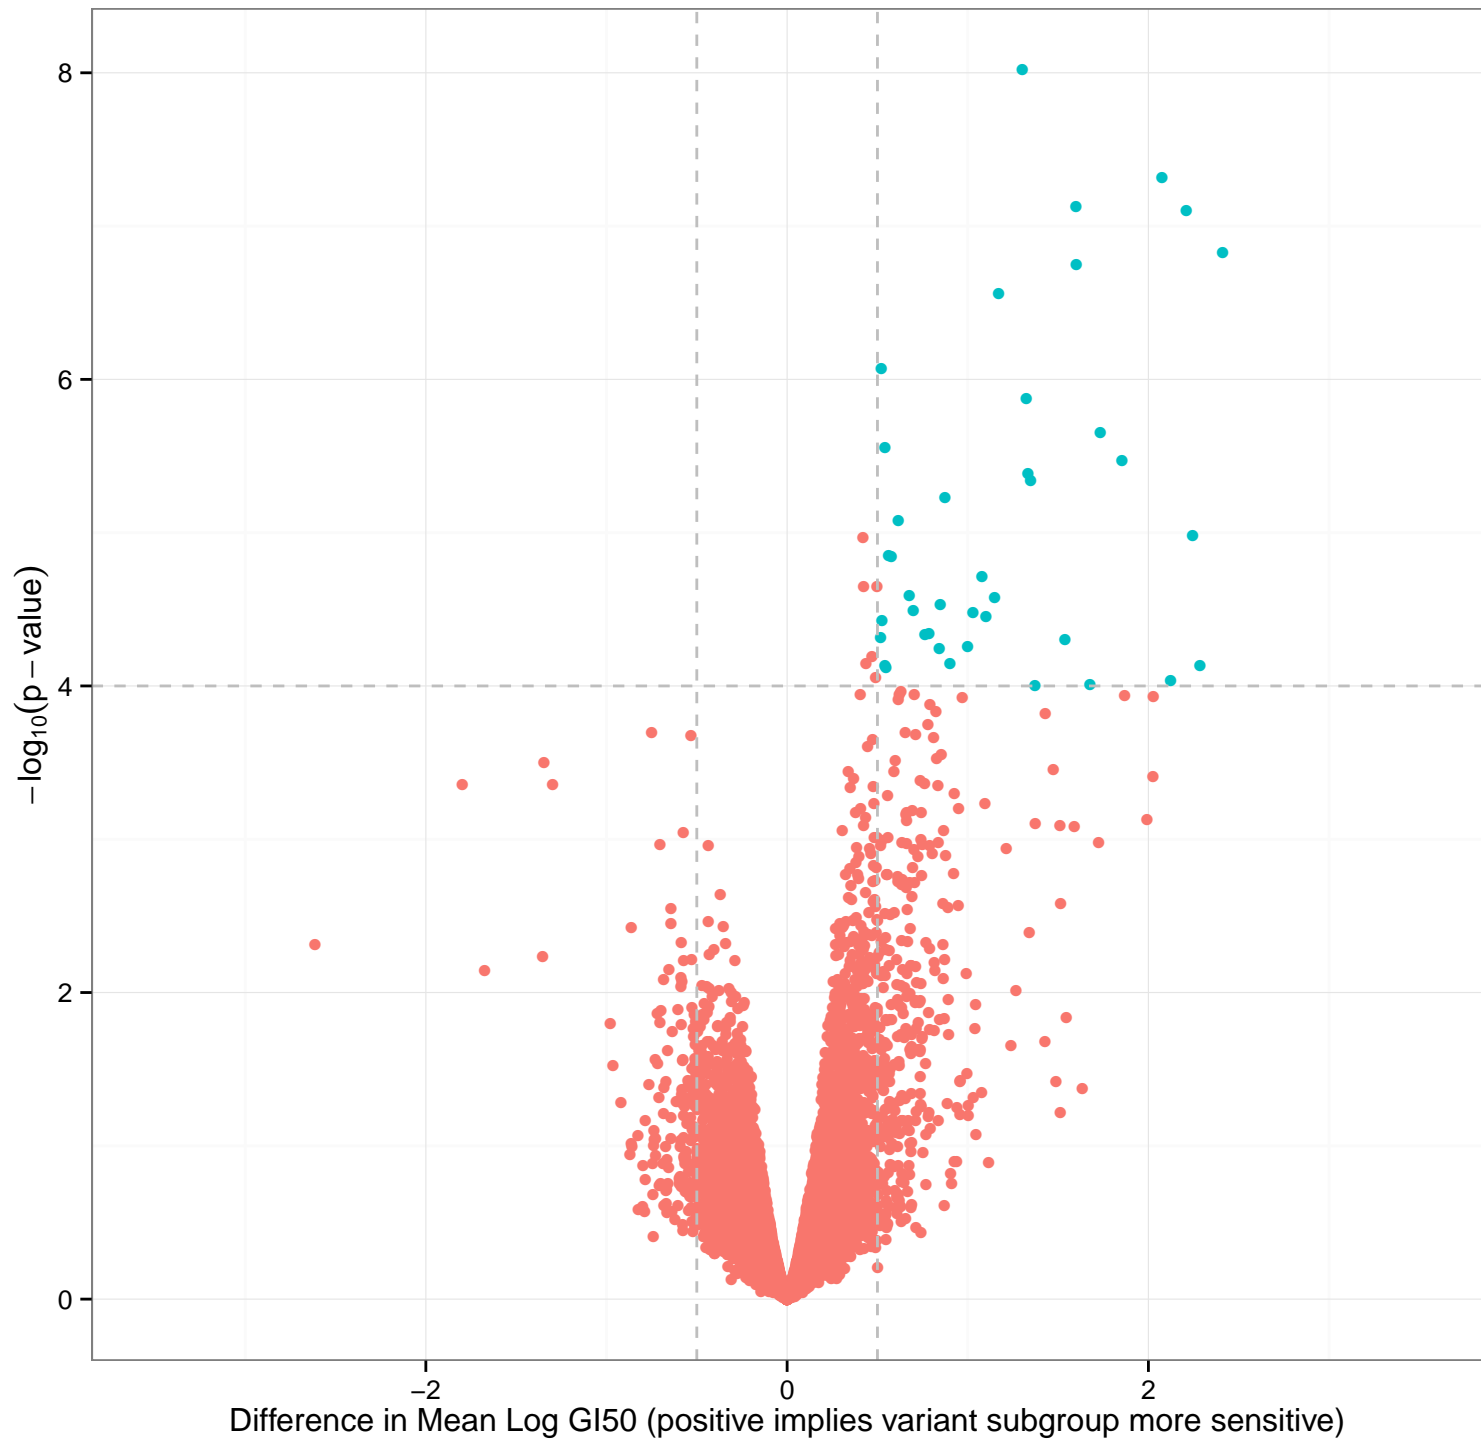



# EPHA3

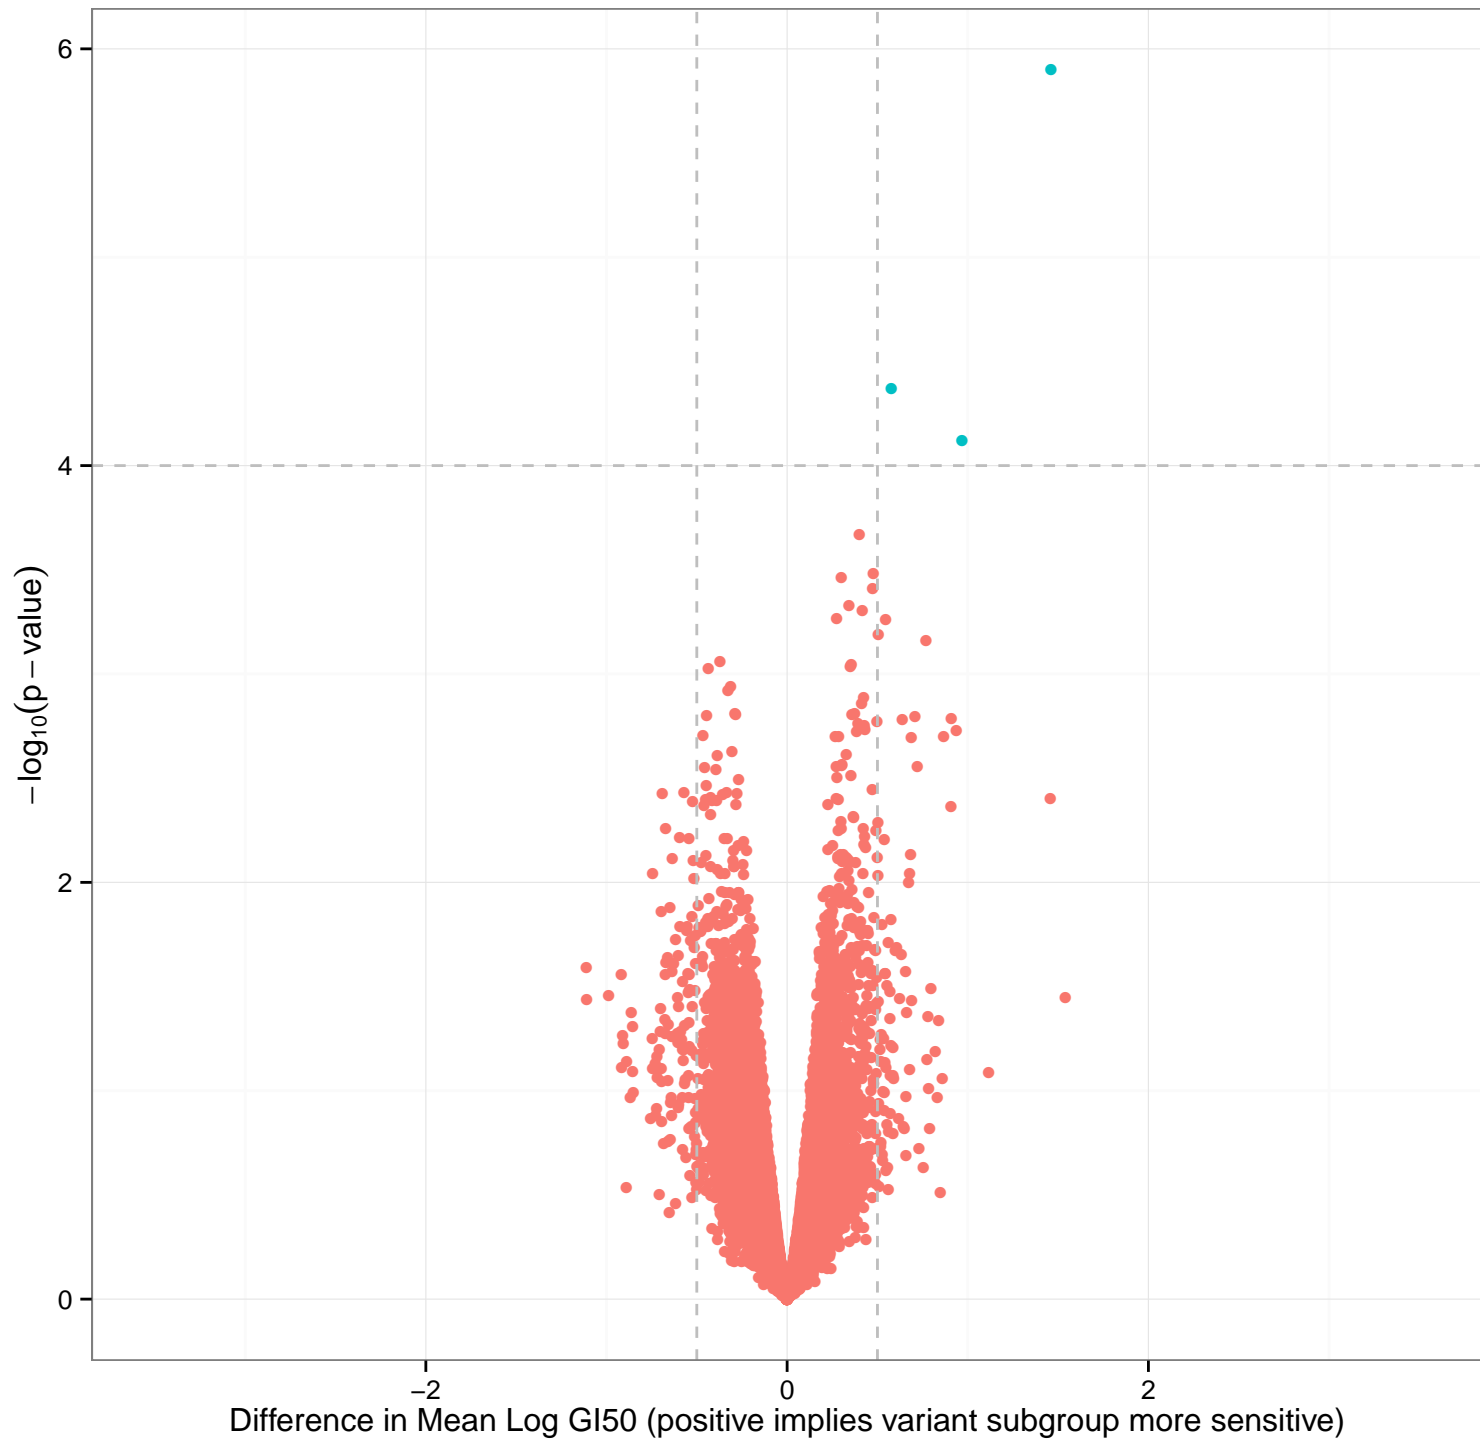



# EPHA5

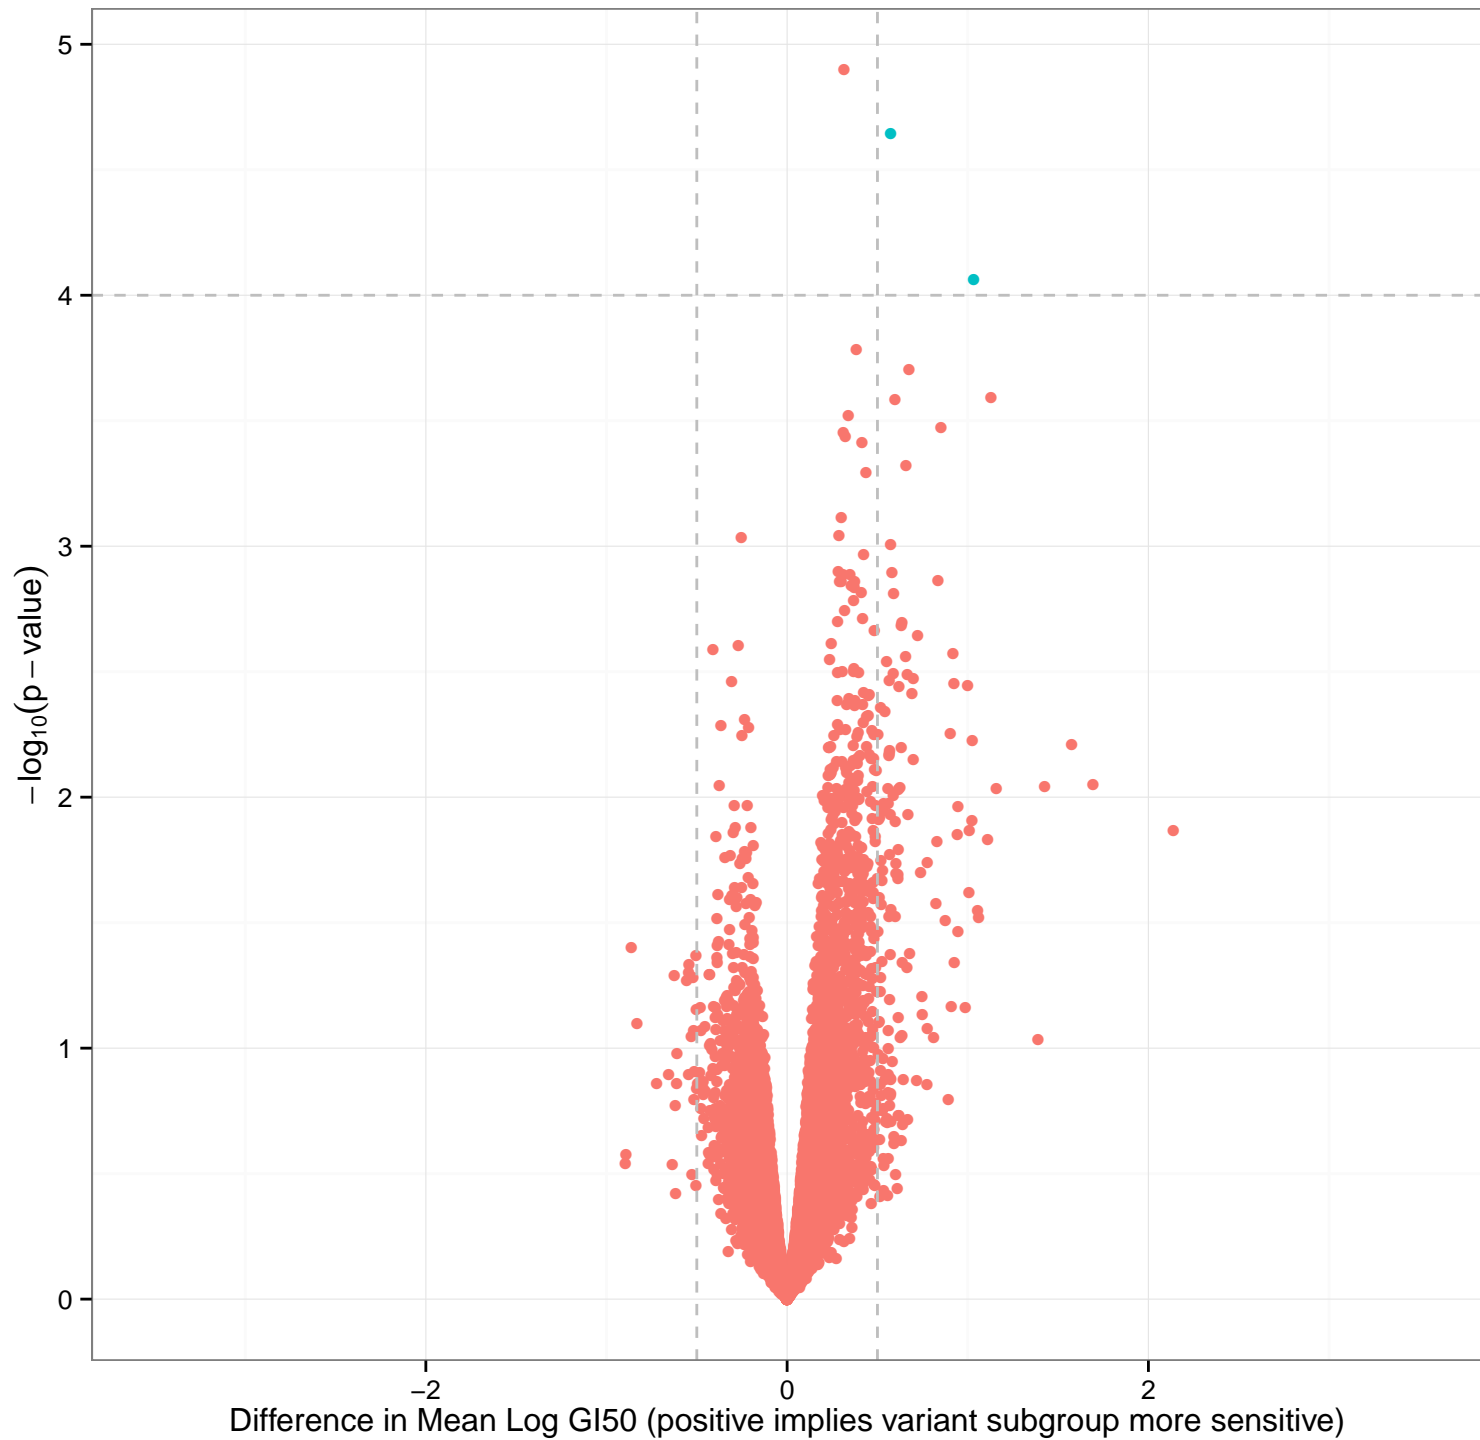



FLT1

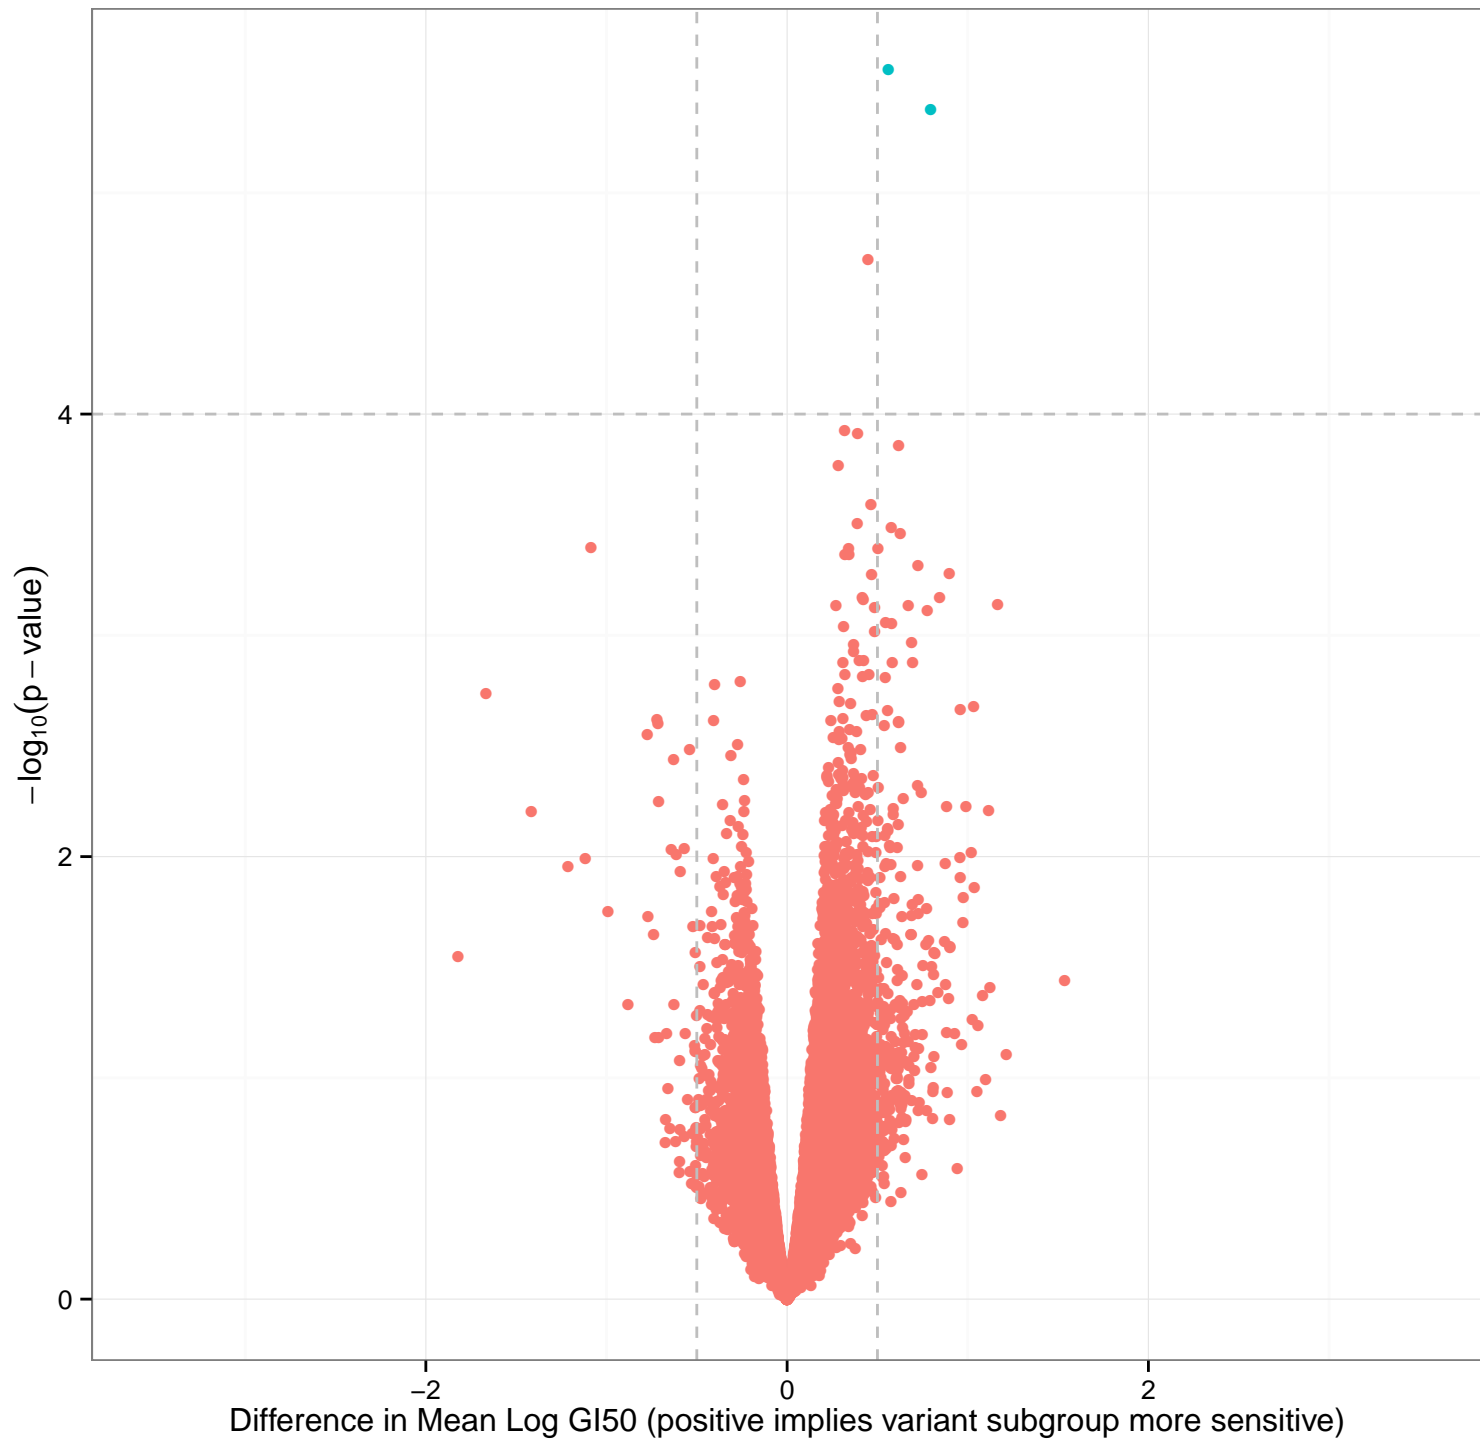

# FLT3

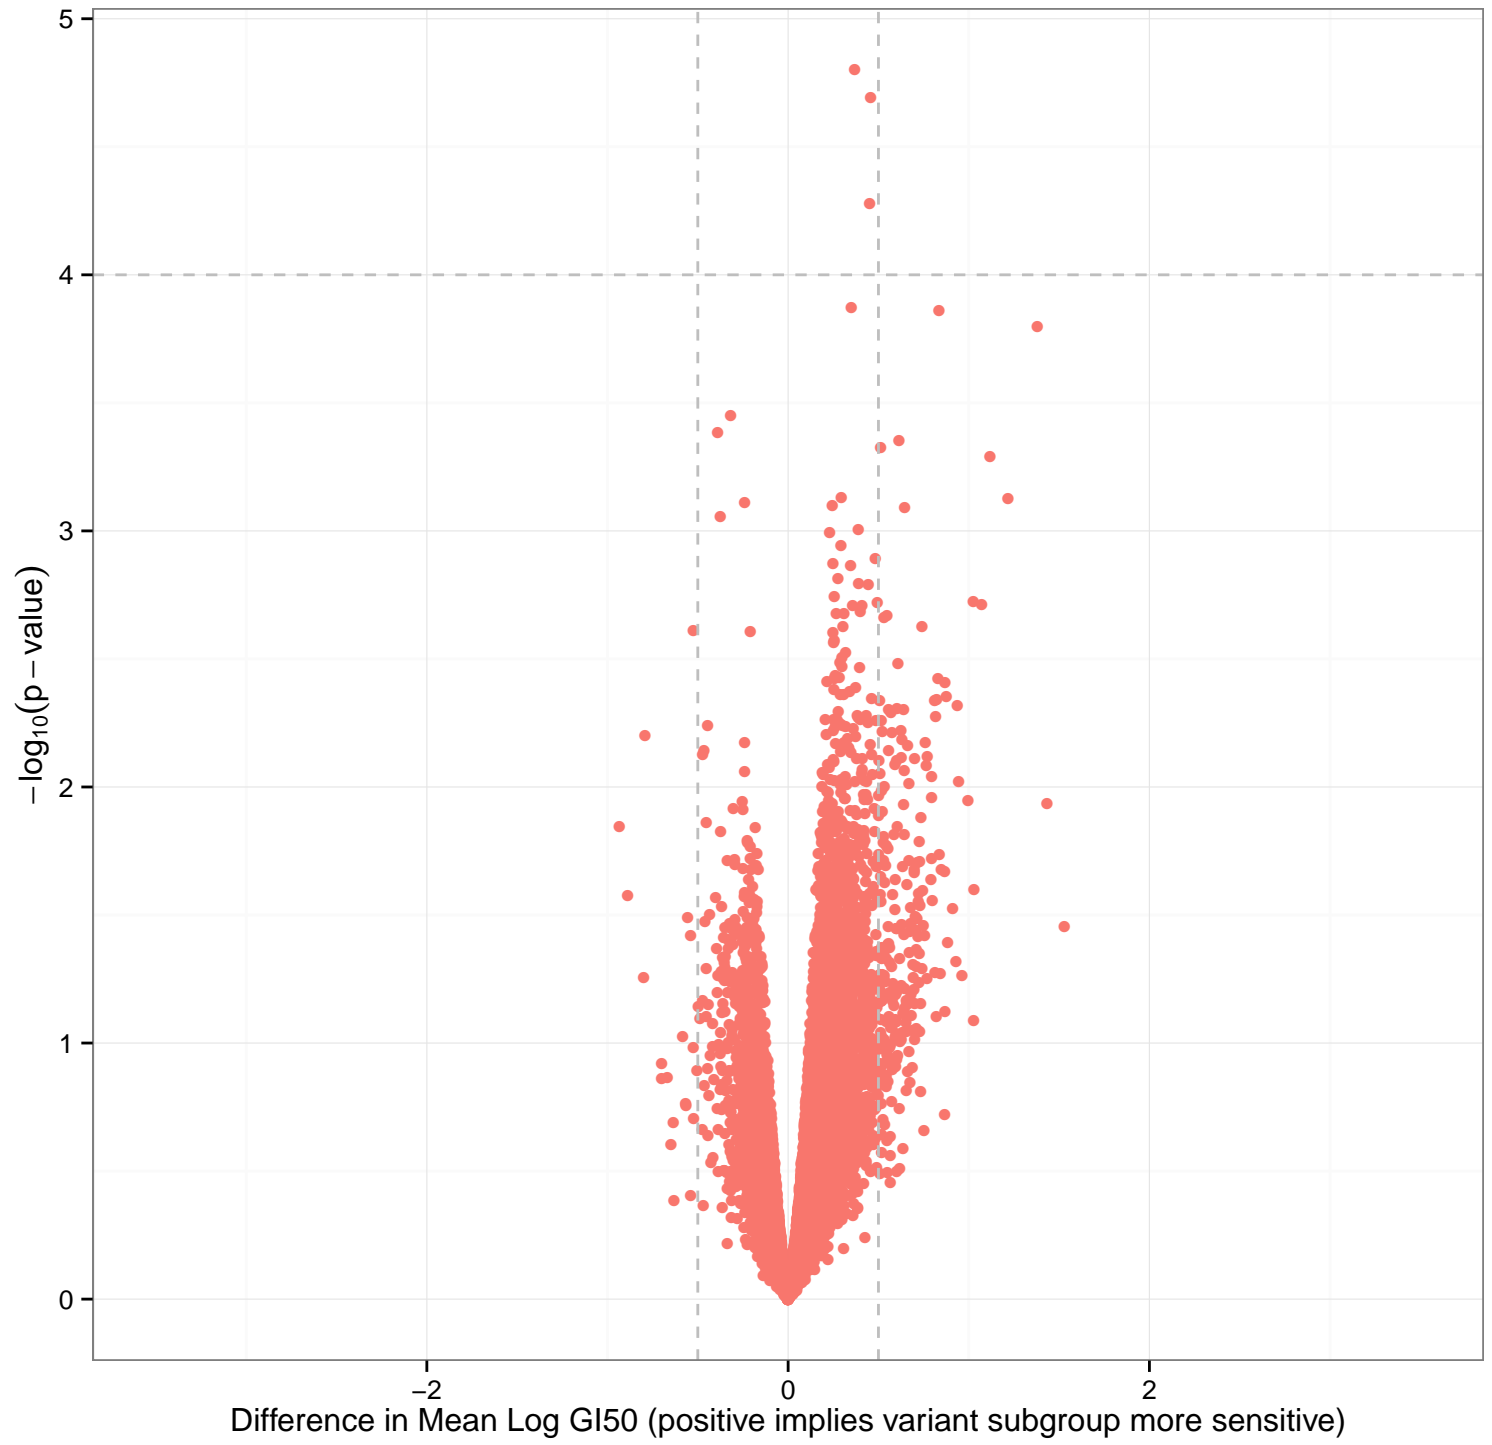

Difference in Mean Log GI50 (positive implies variant subgroup more sensitive)

# GNAS

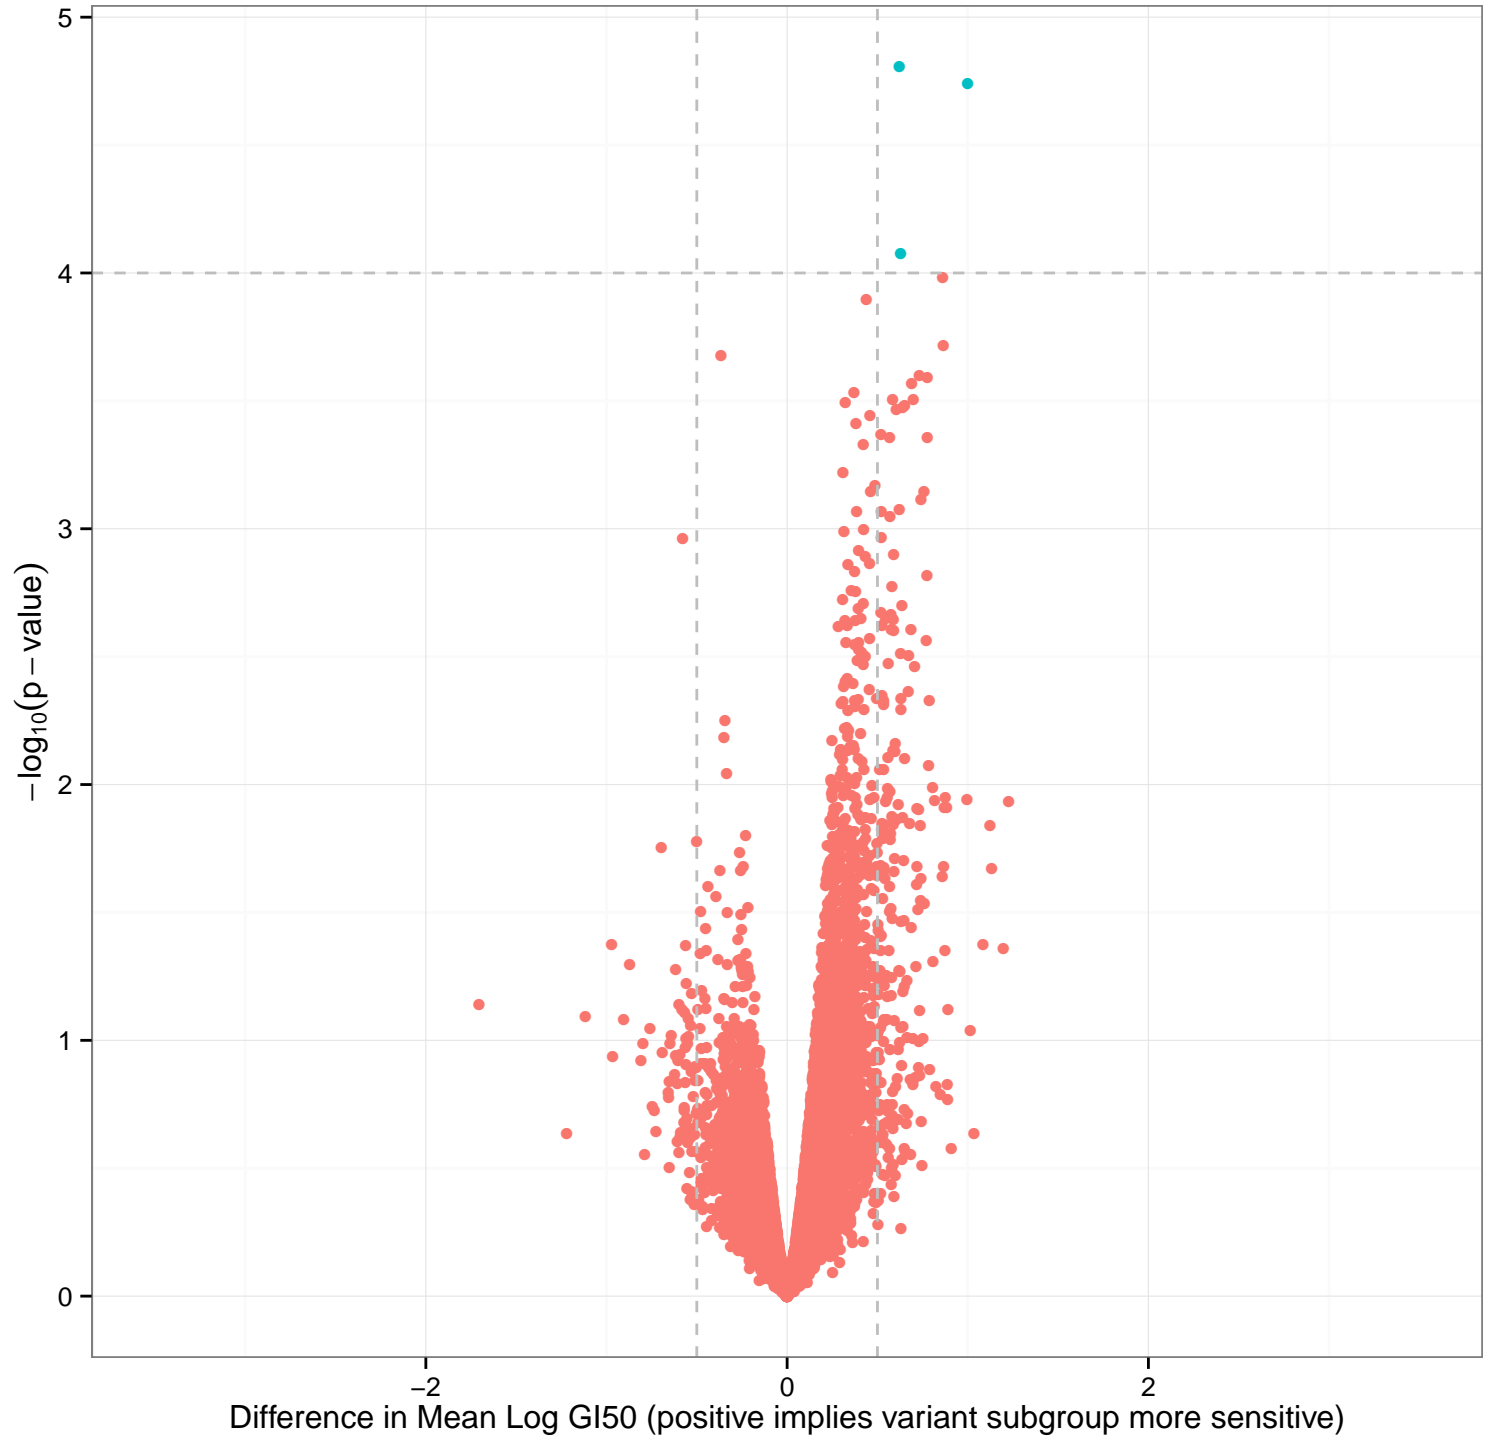

# GRIN2A

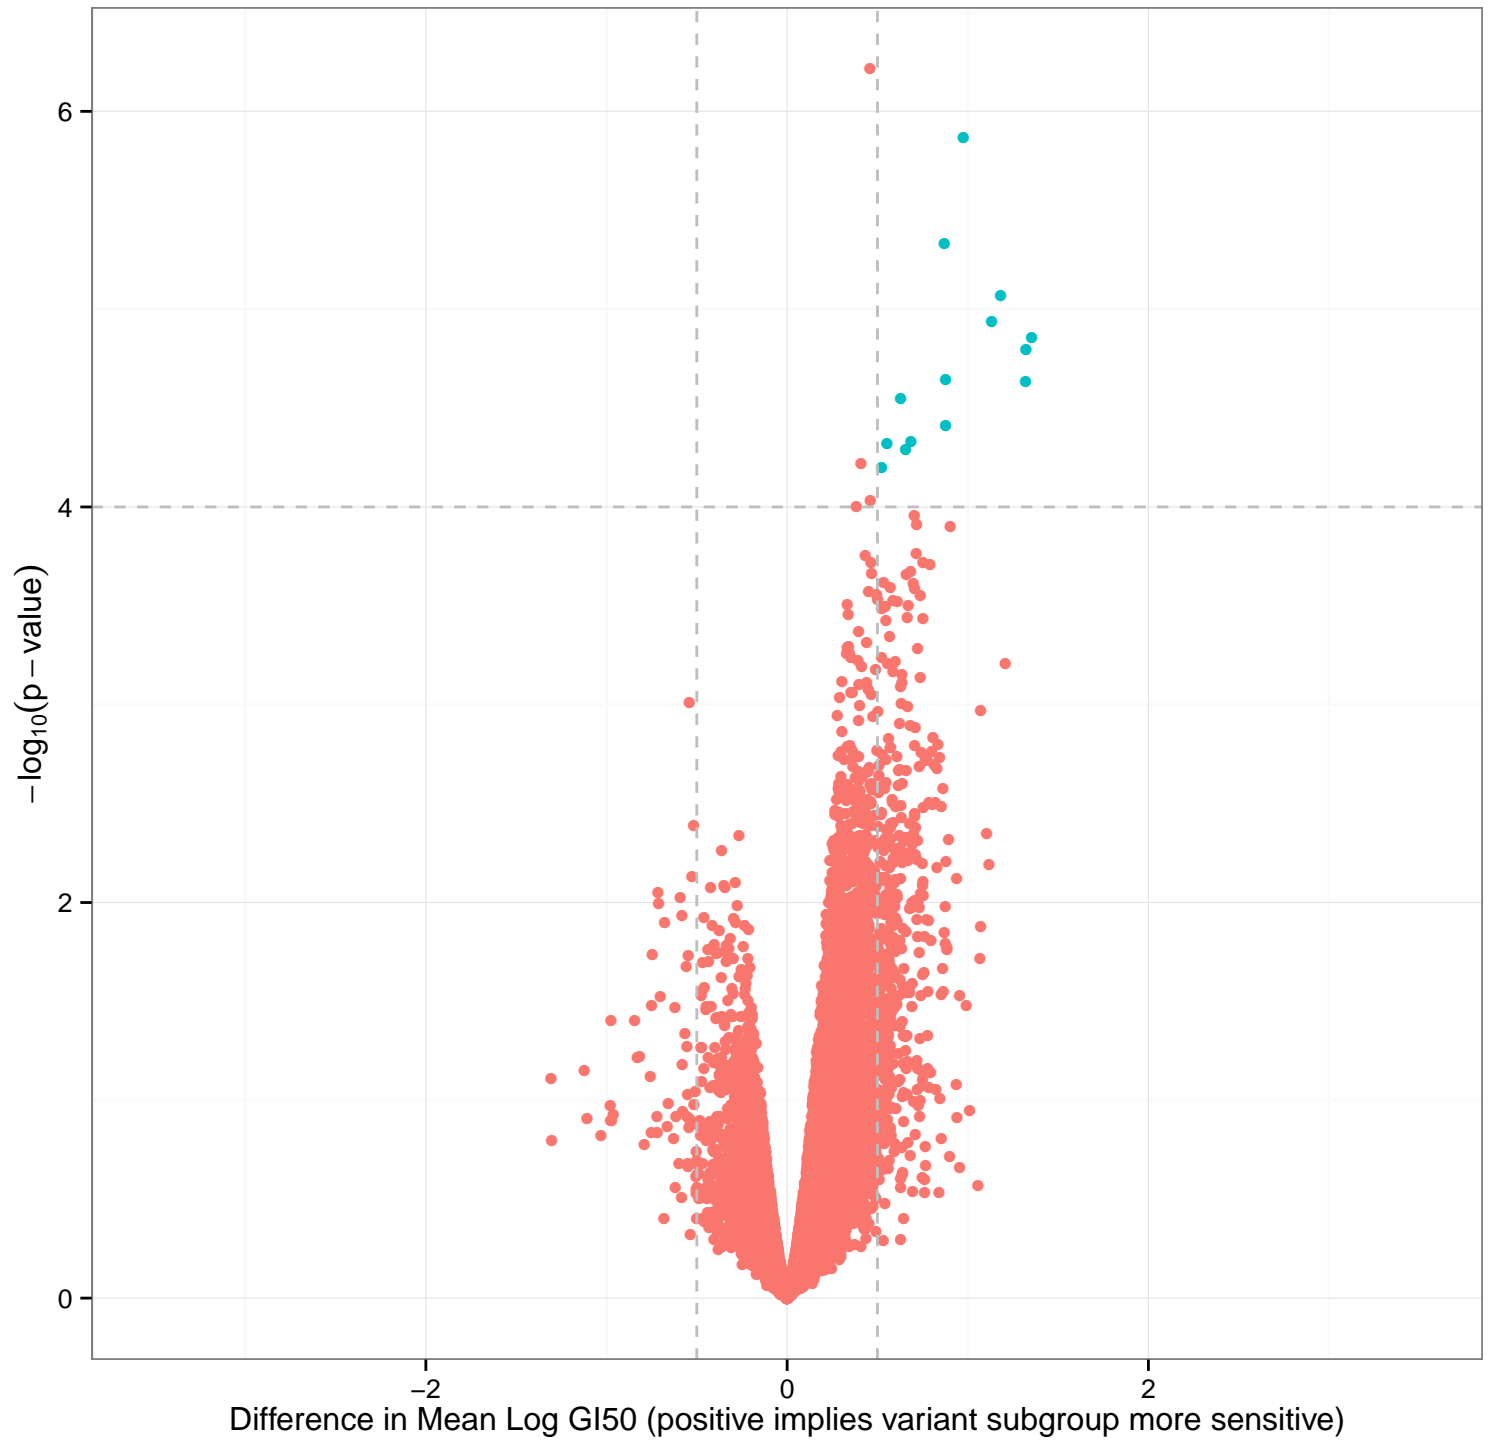

# GUCY1A2

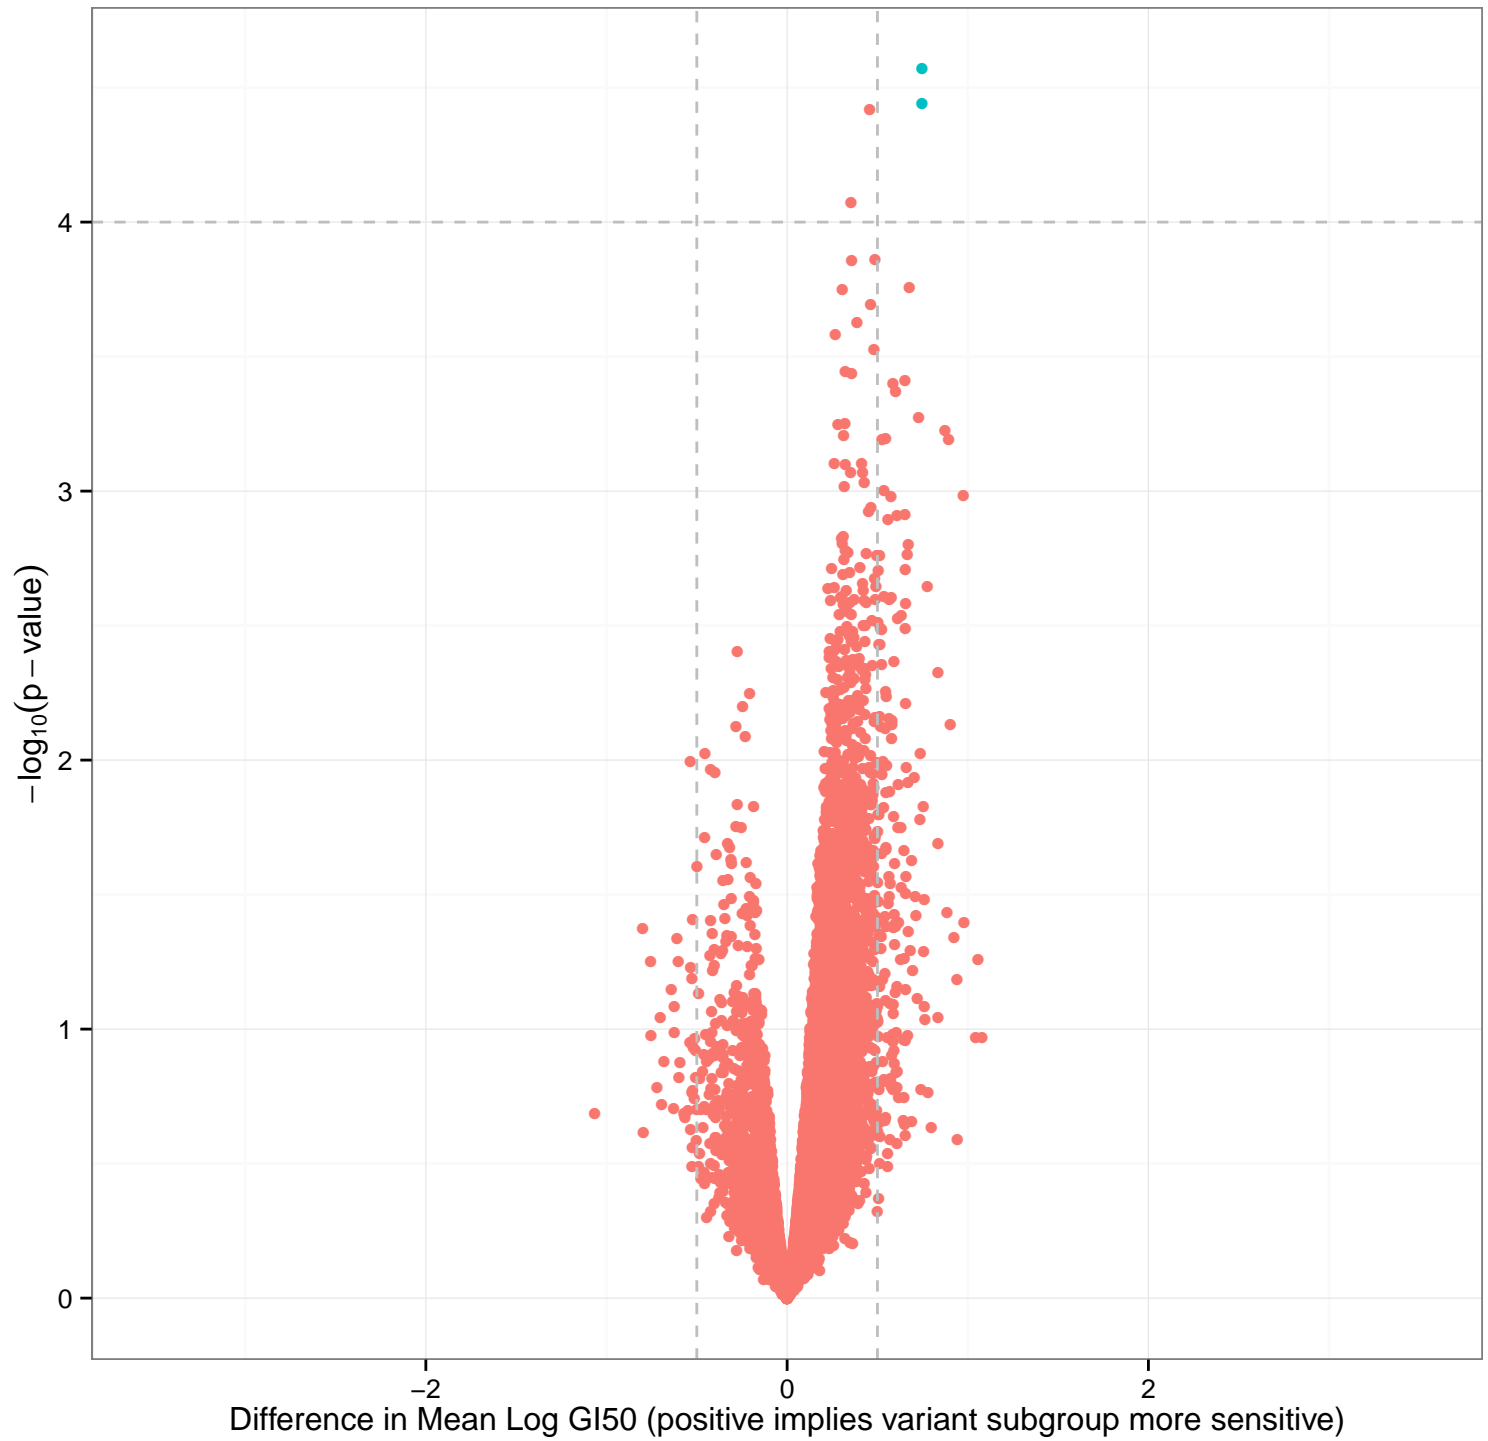

# IGF1R

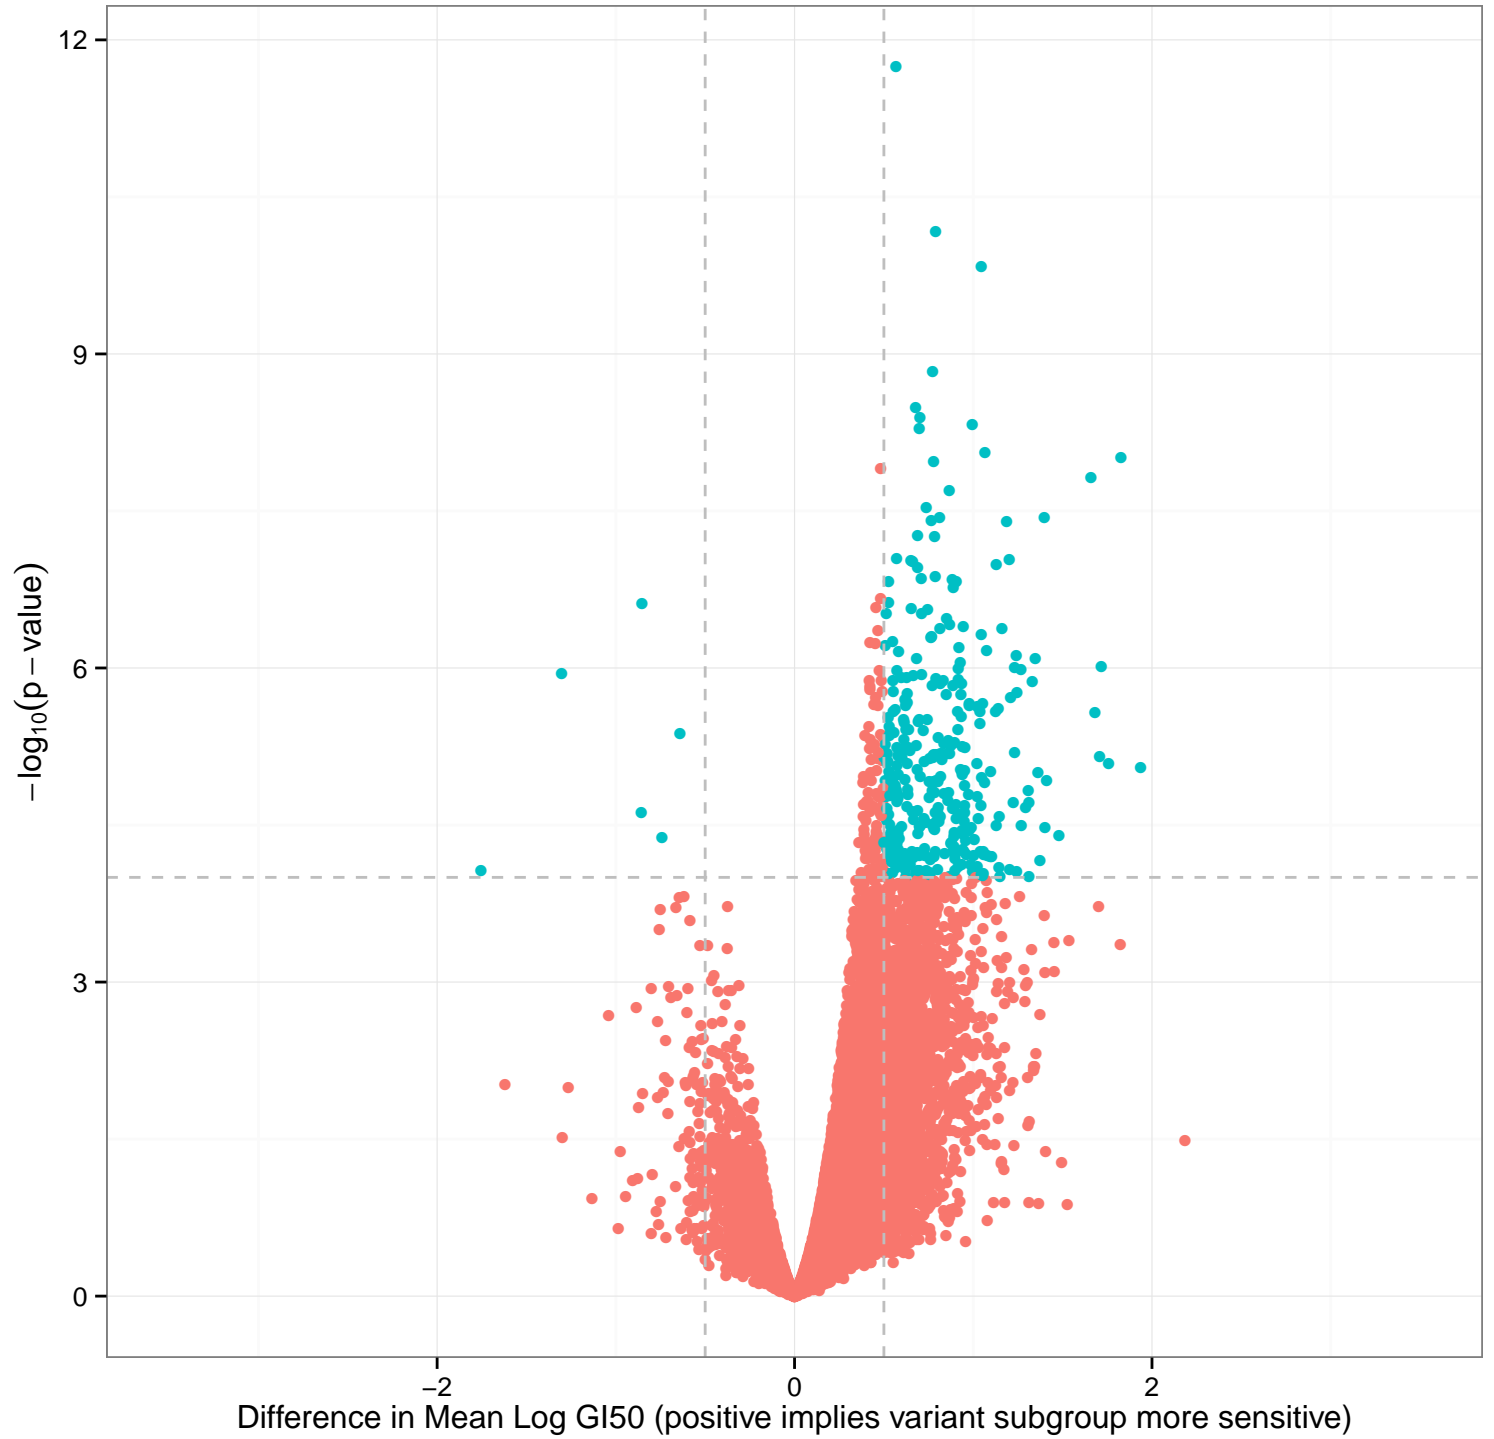



# IGF2R

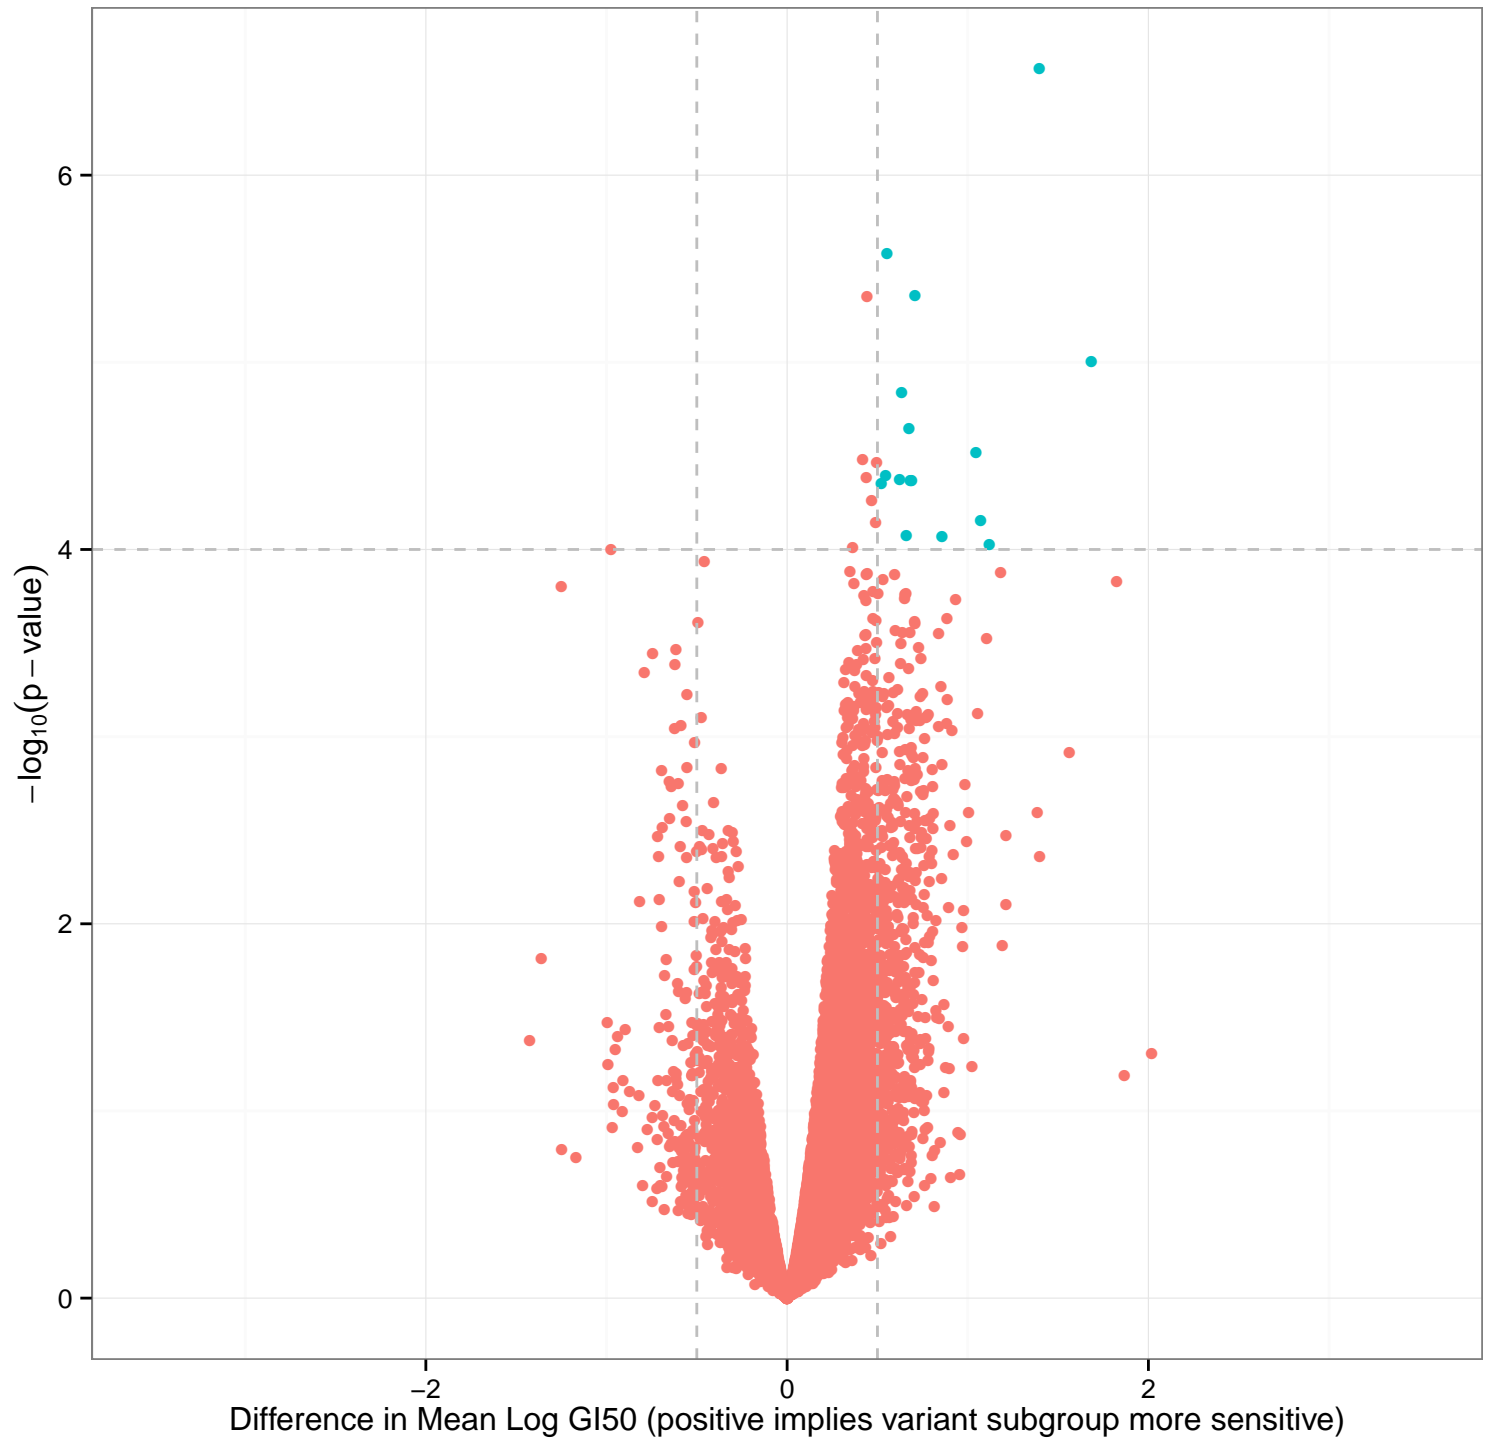

# IL4R

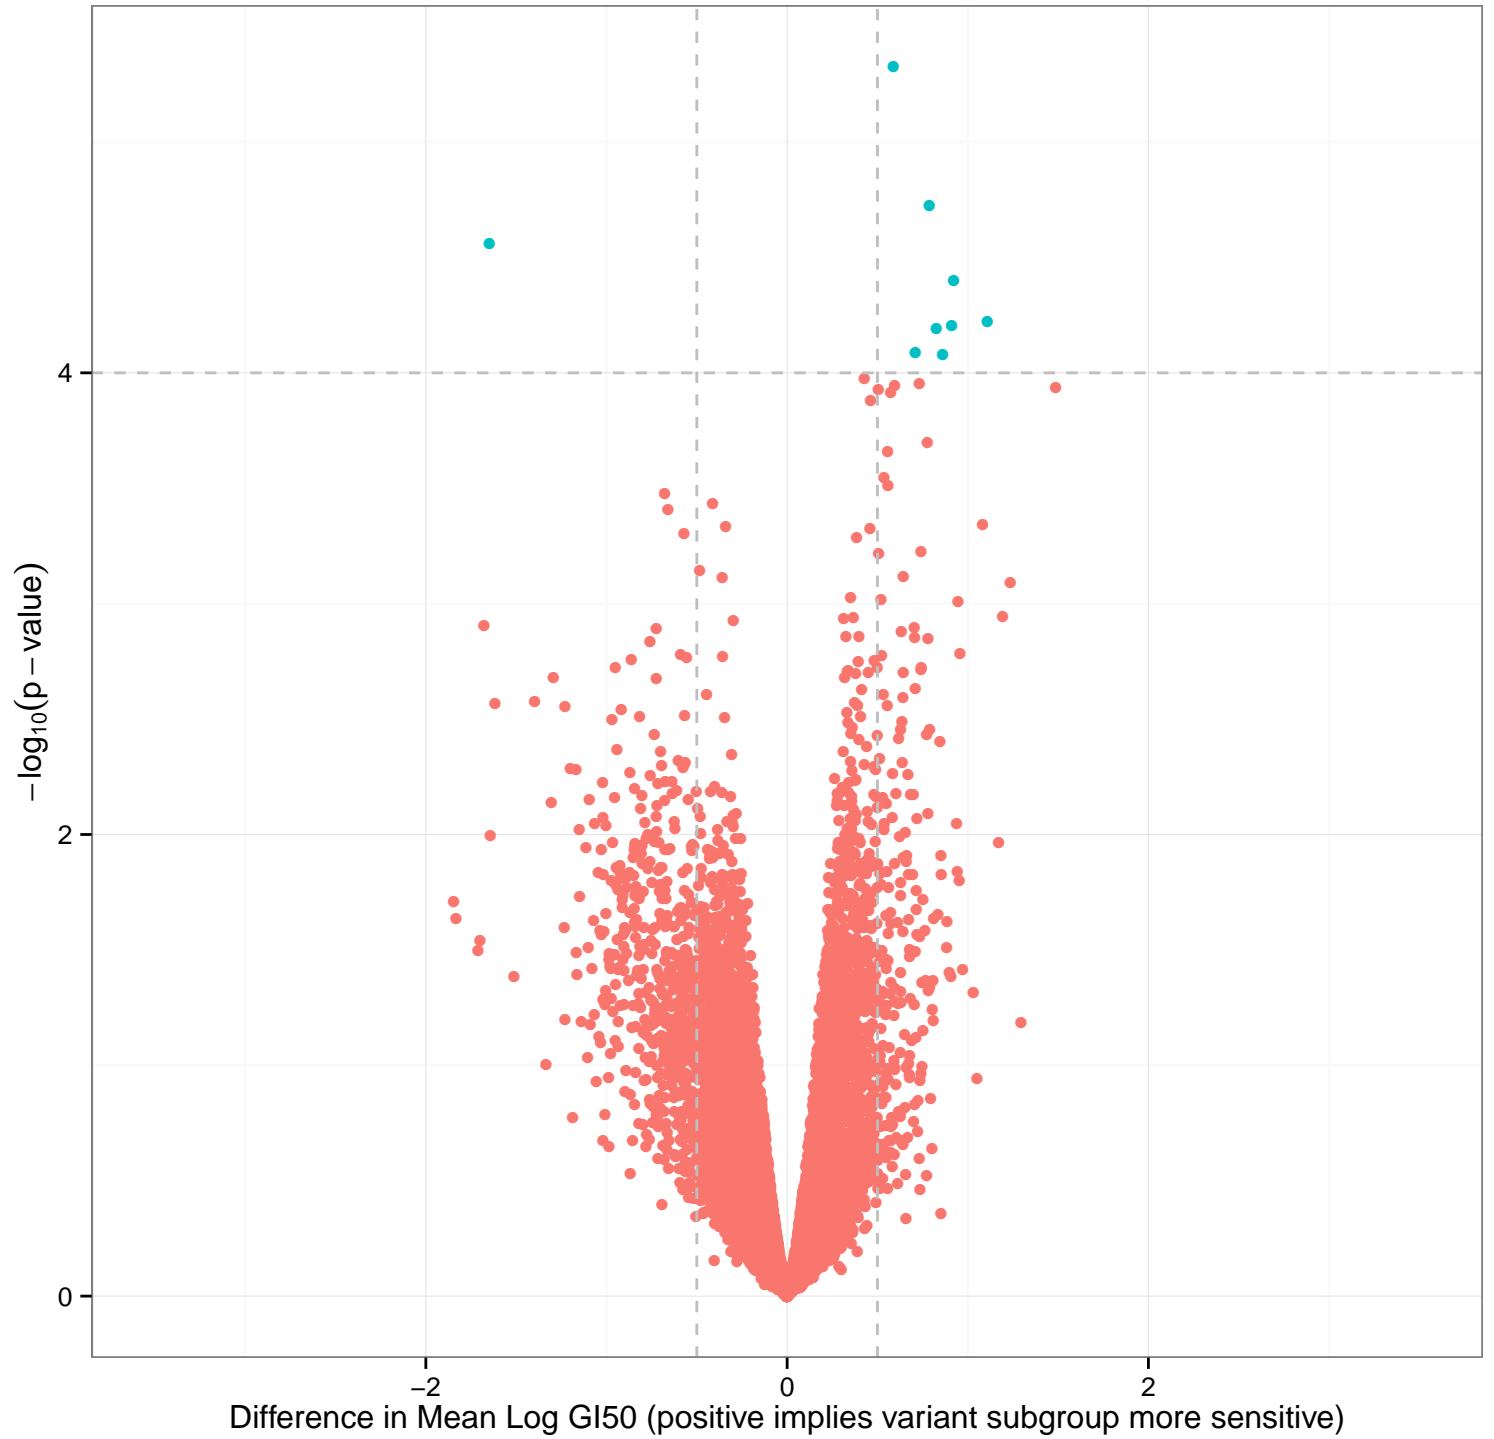

# KDR

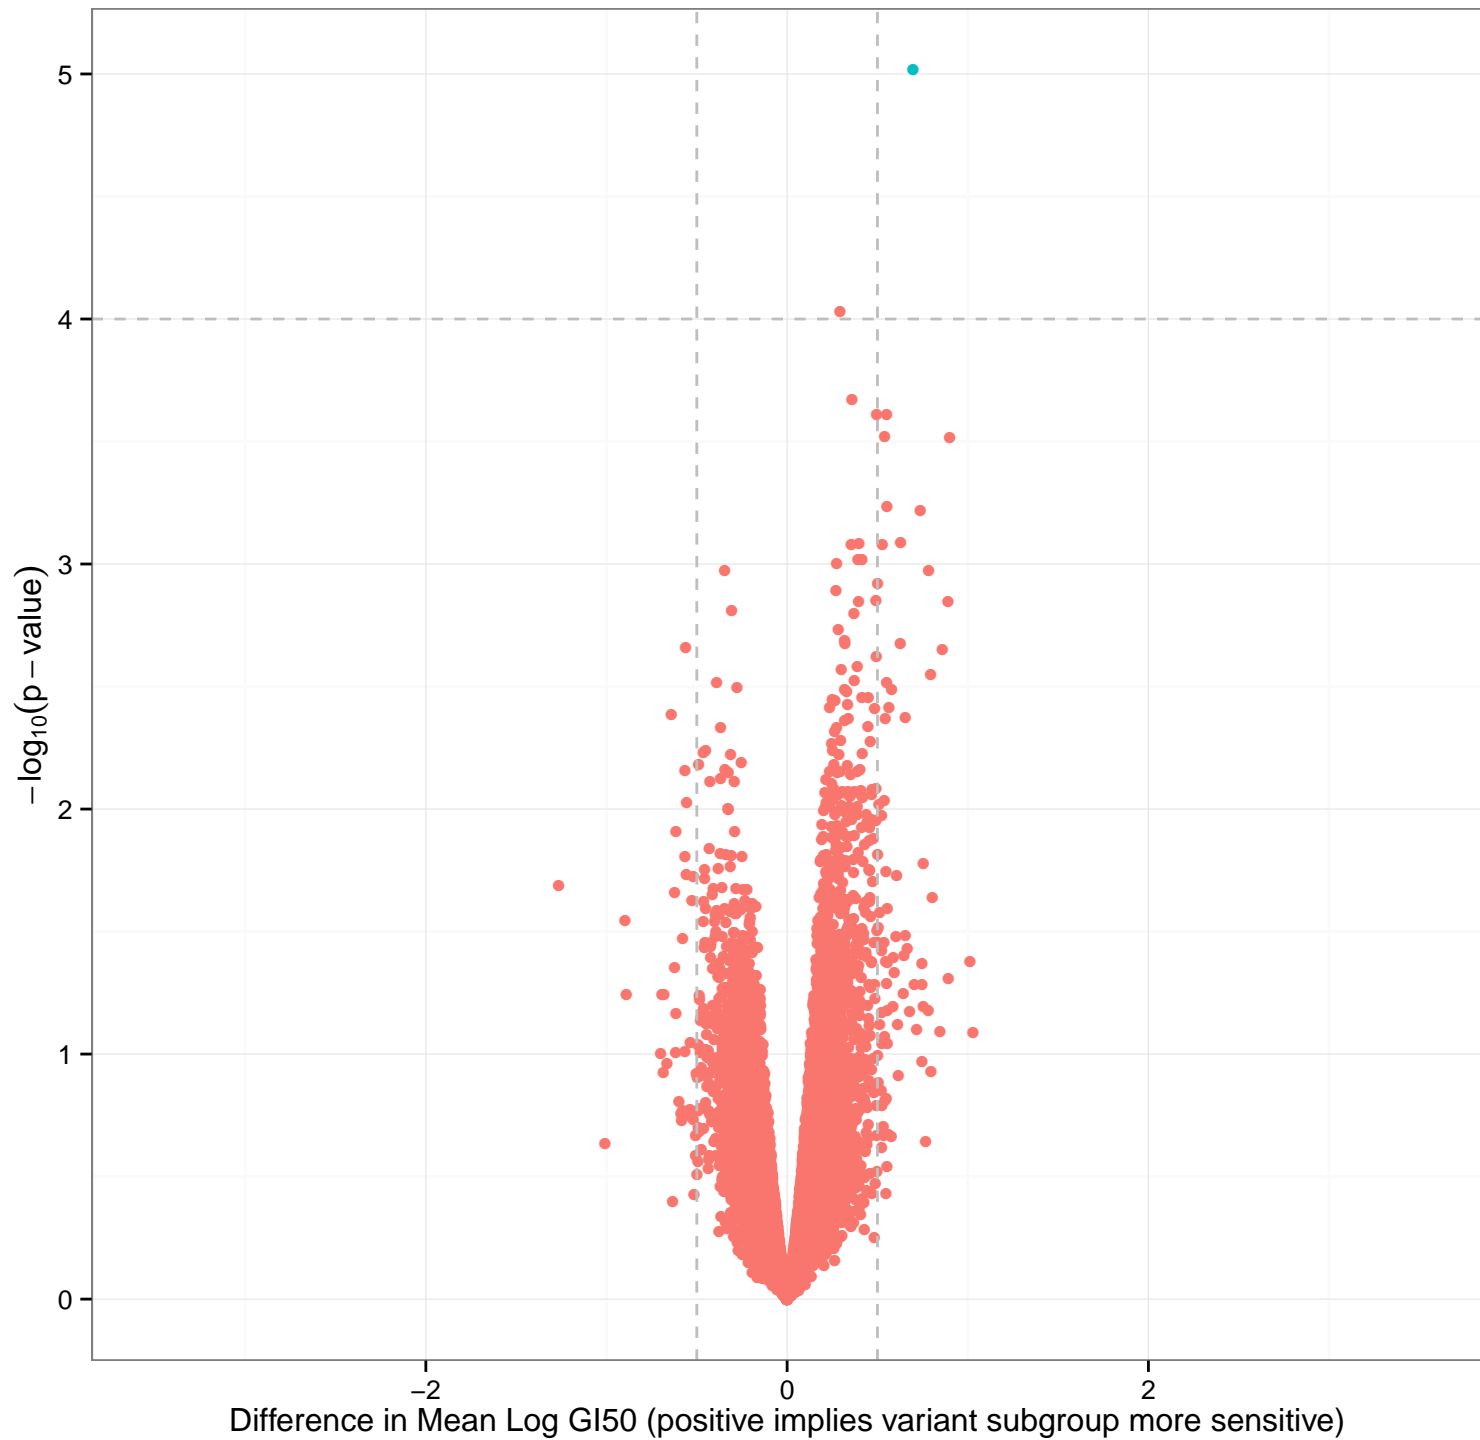

# KRAS

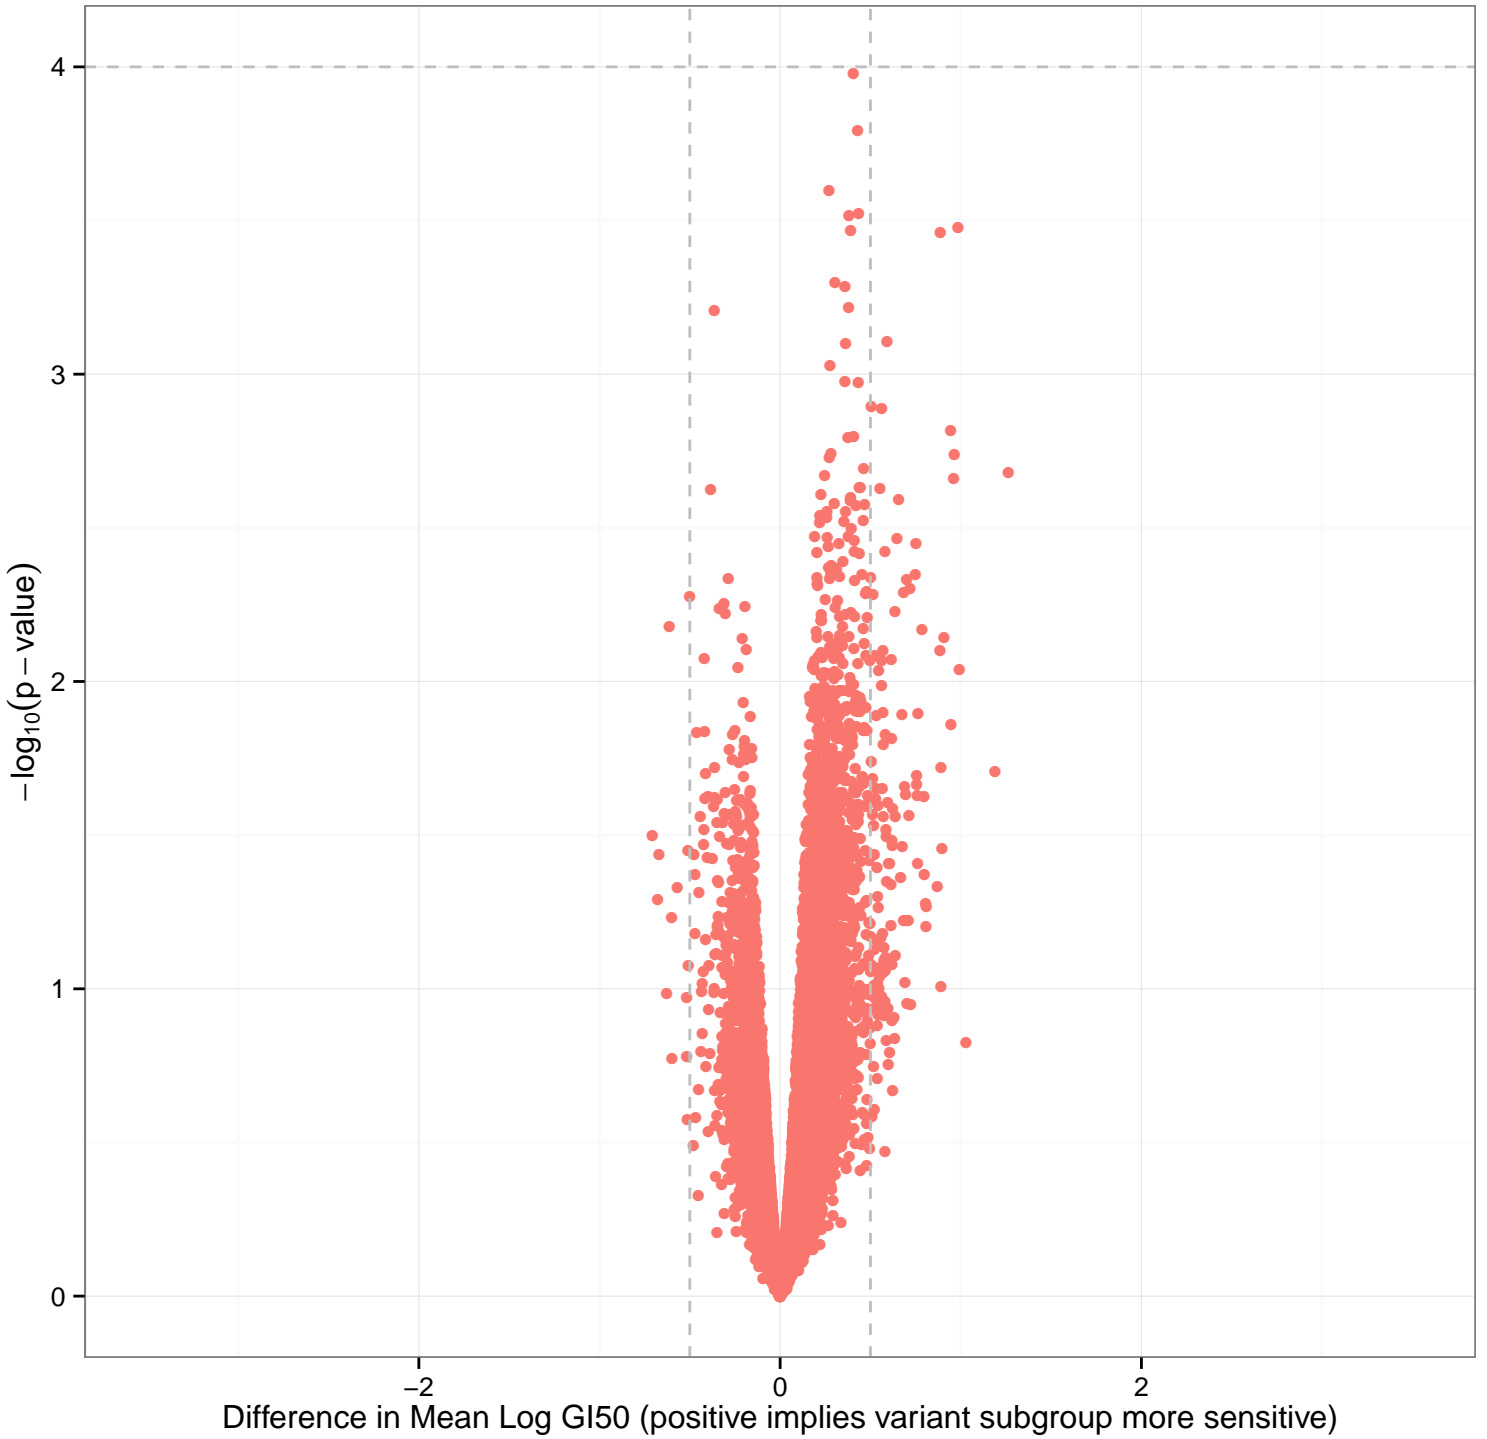

# LRP1B

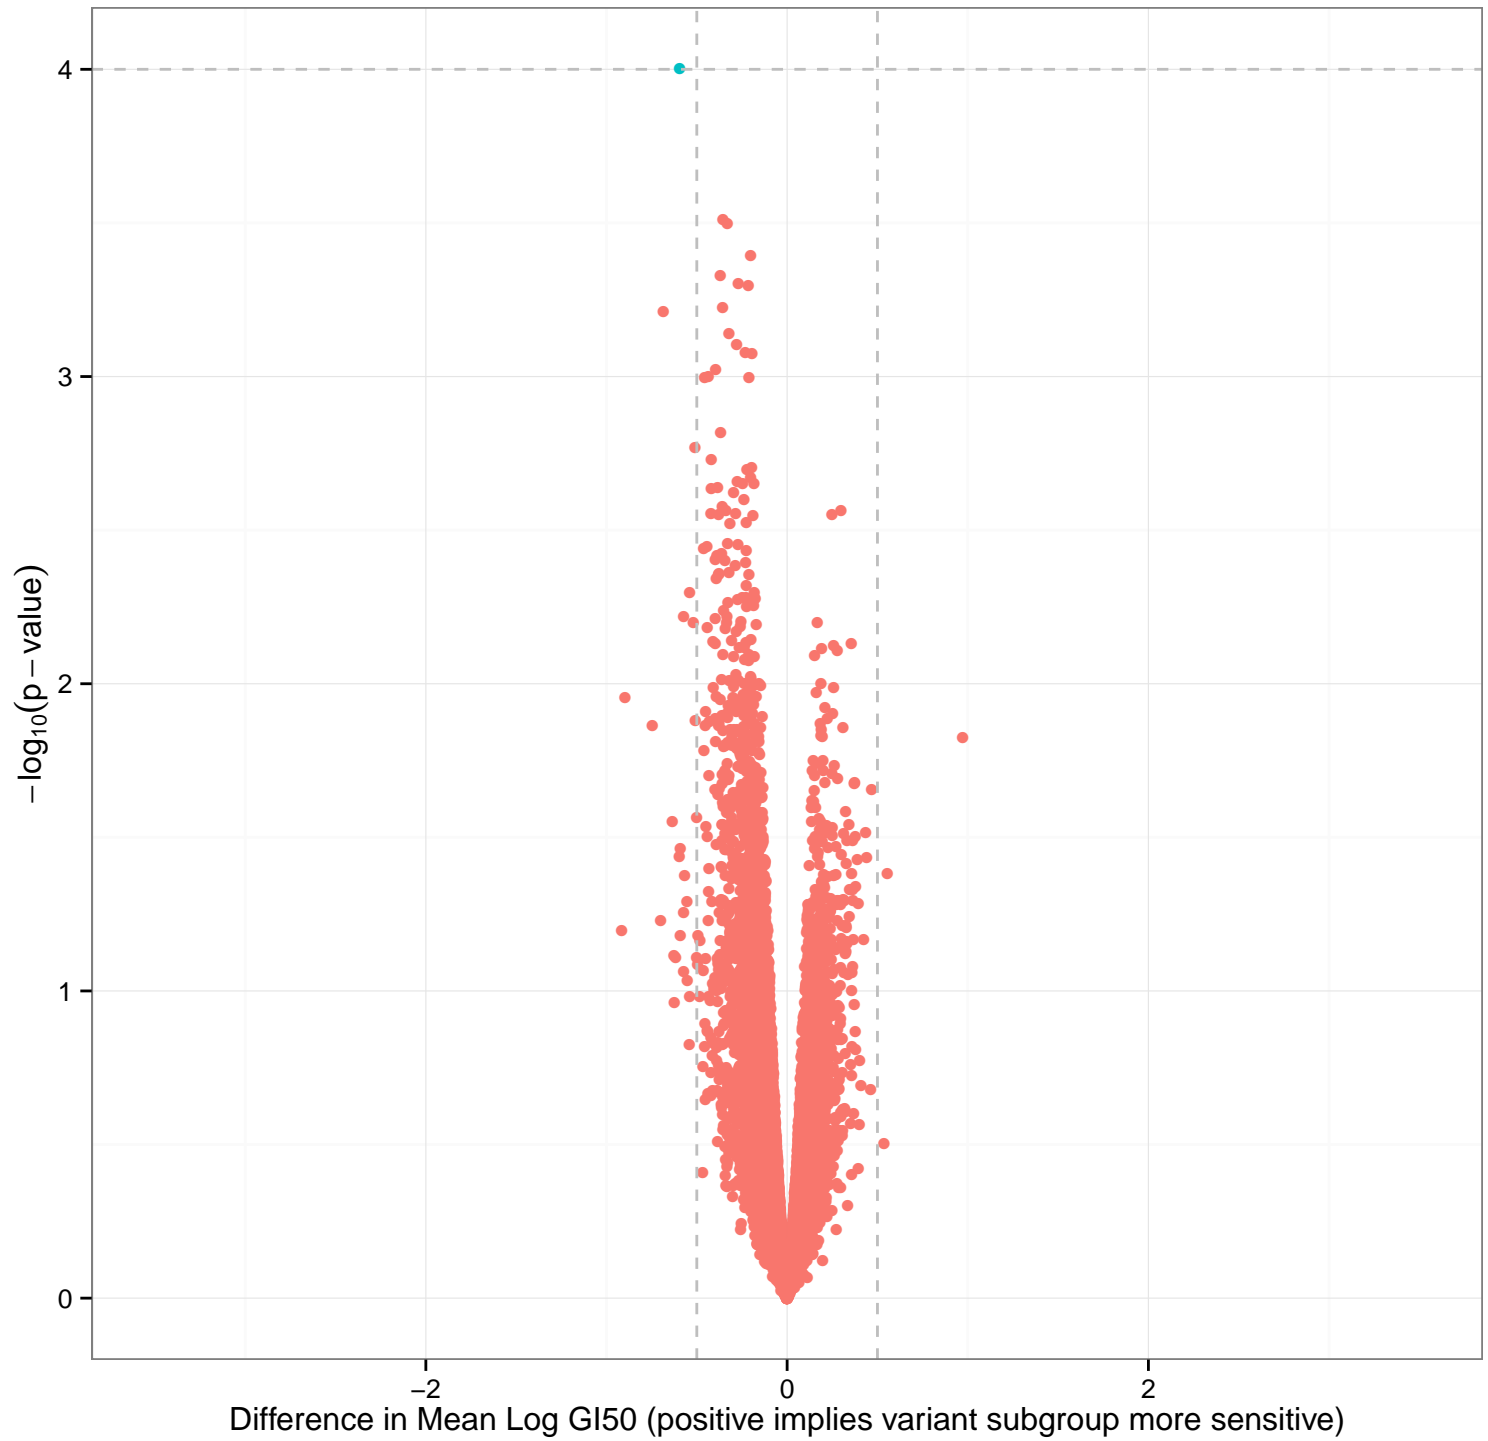

# MLH1

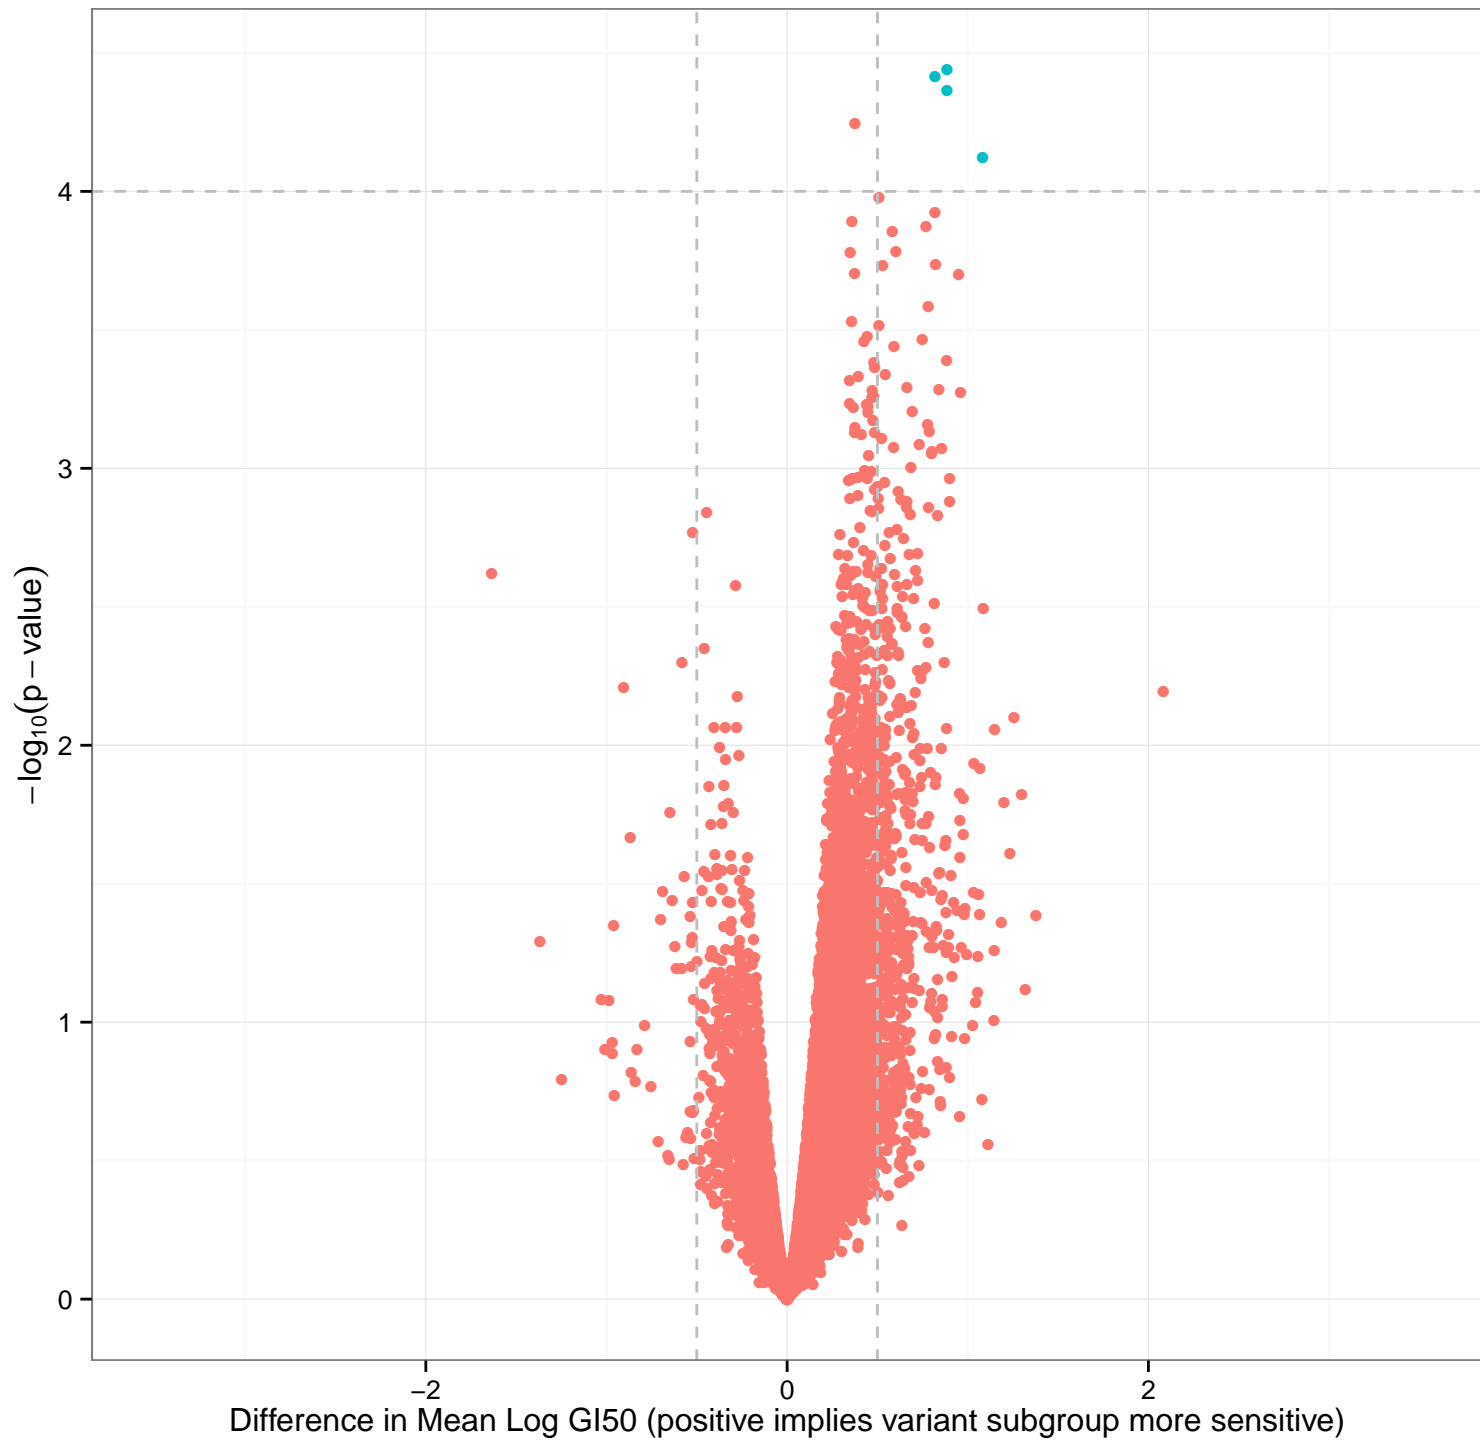

# MSH2

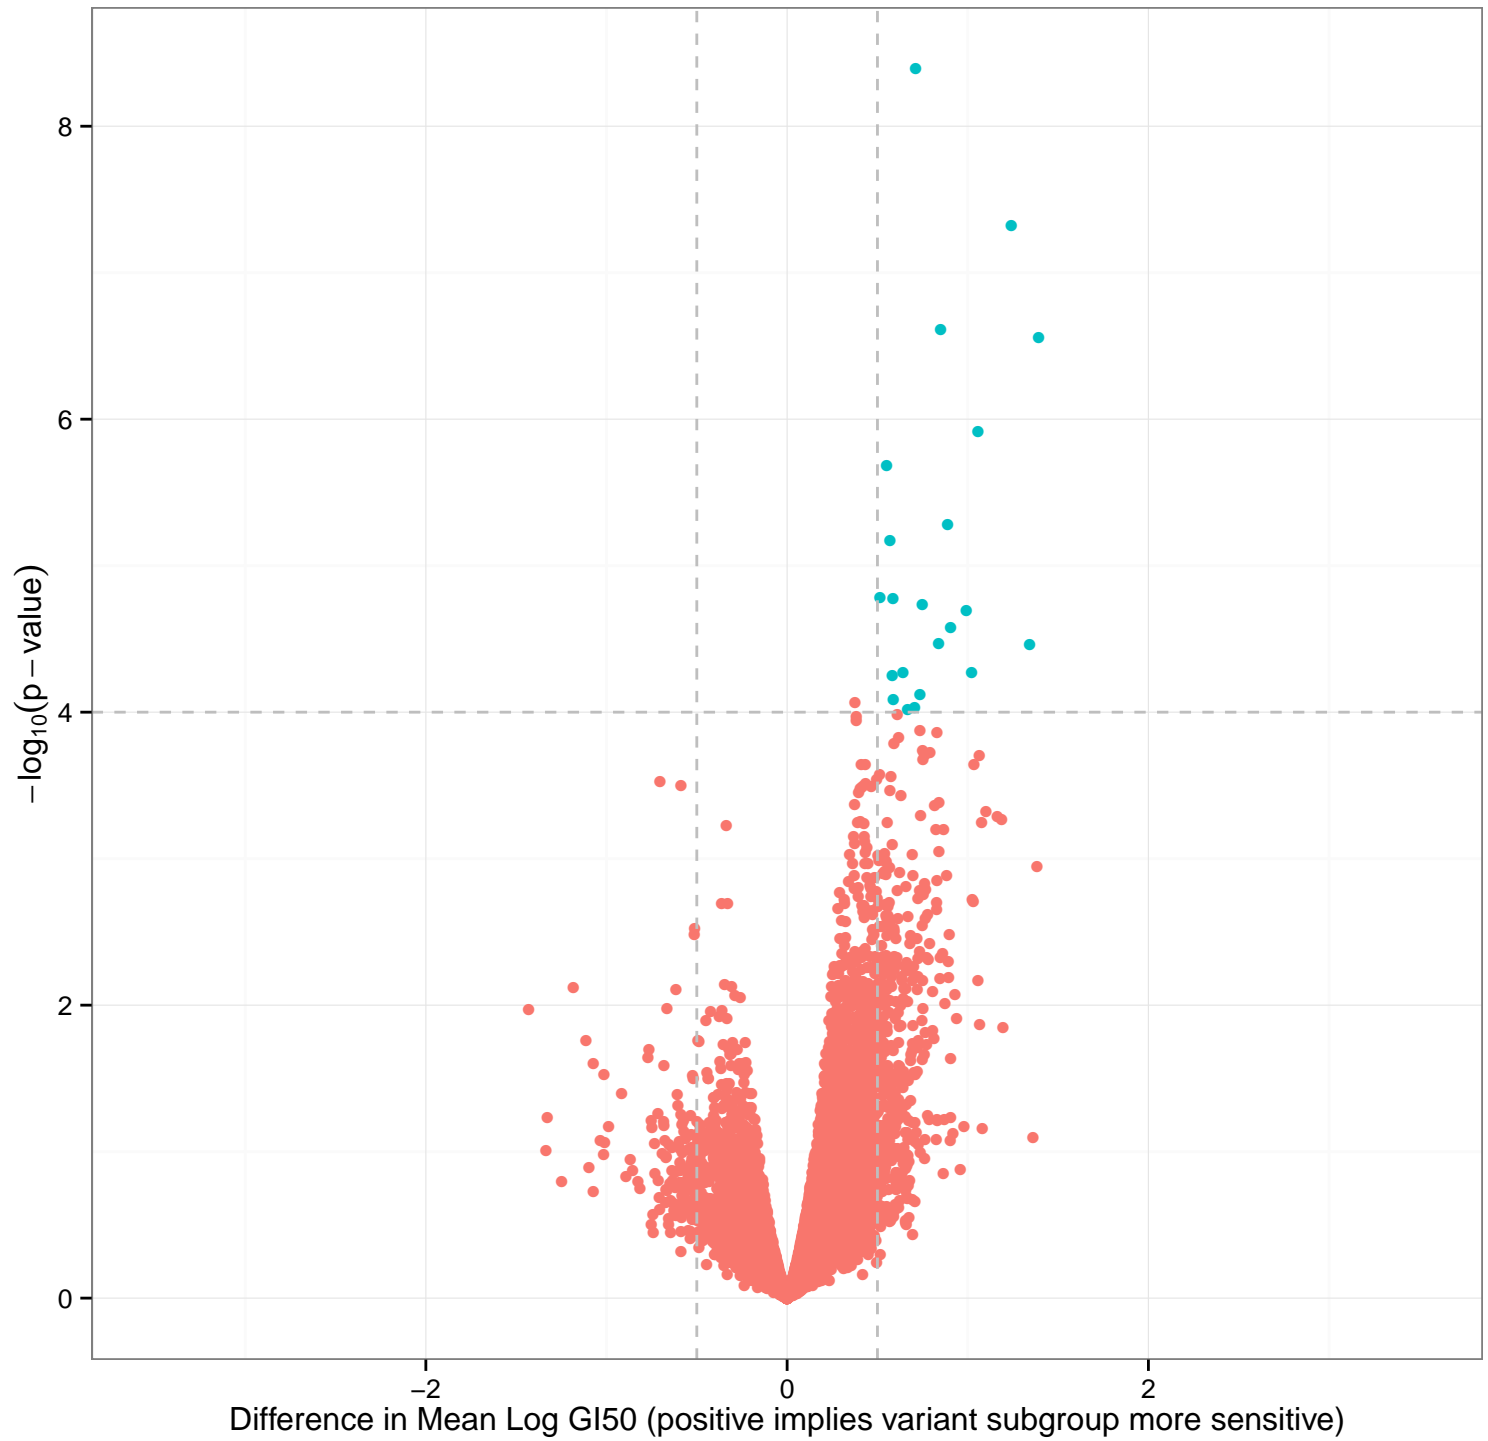

NF1

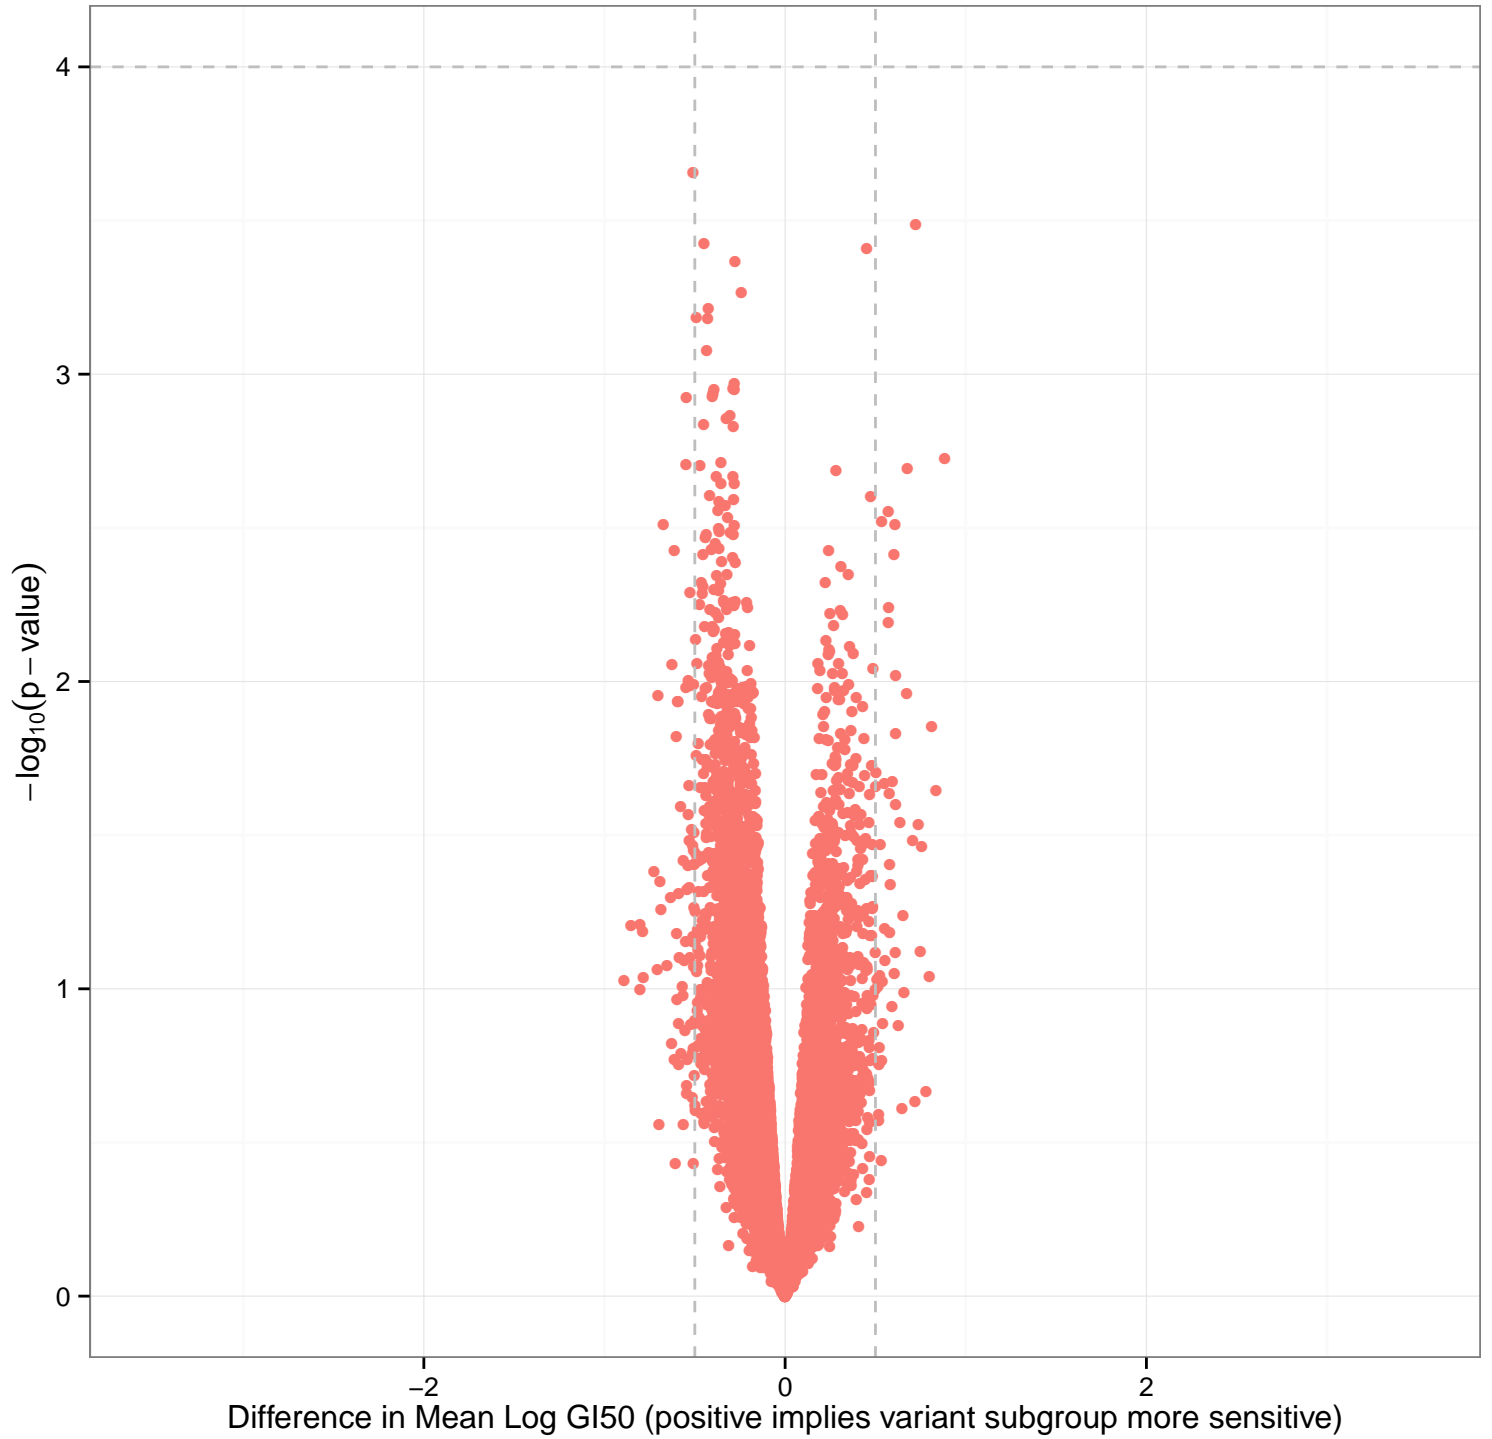



# NOTCH1

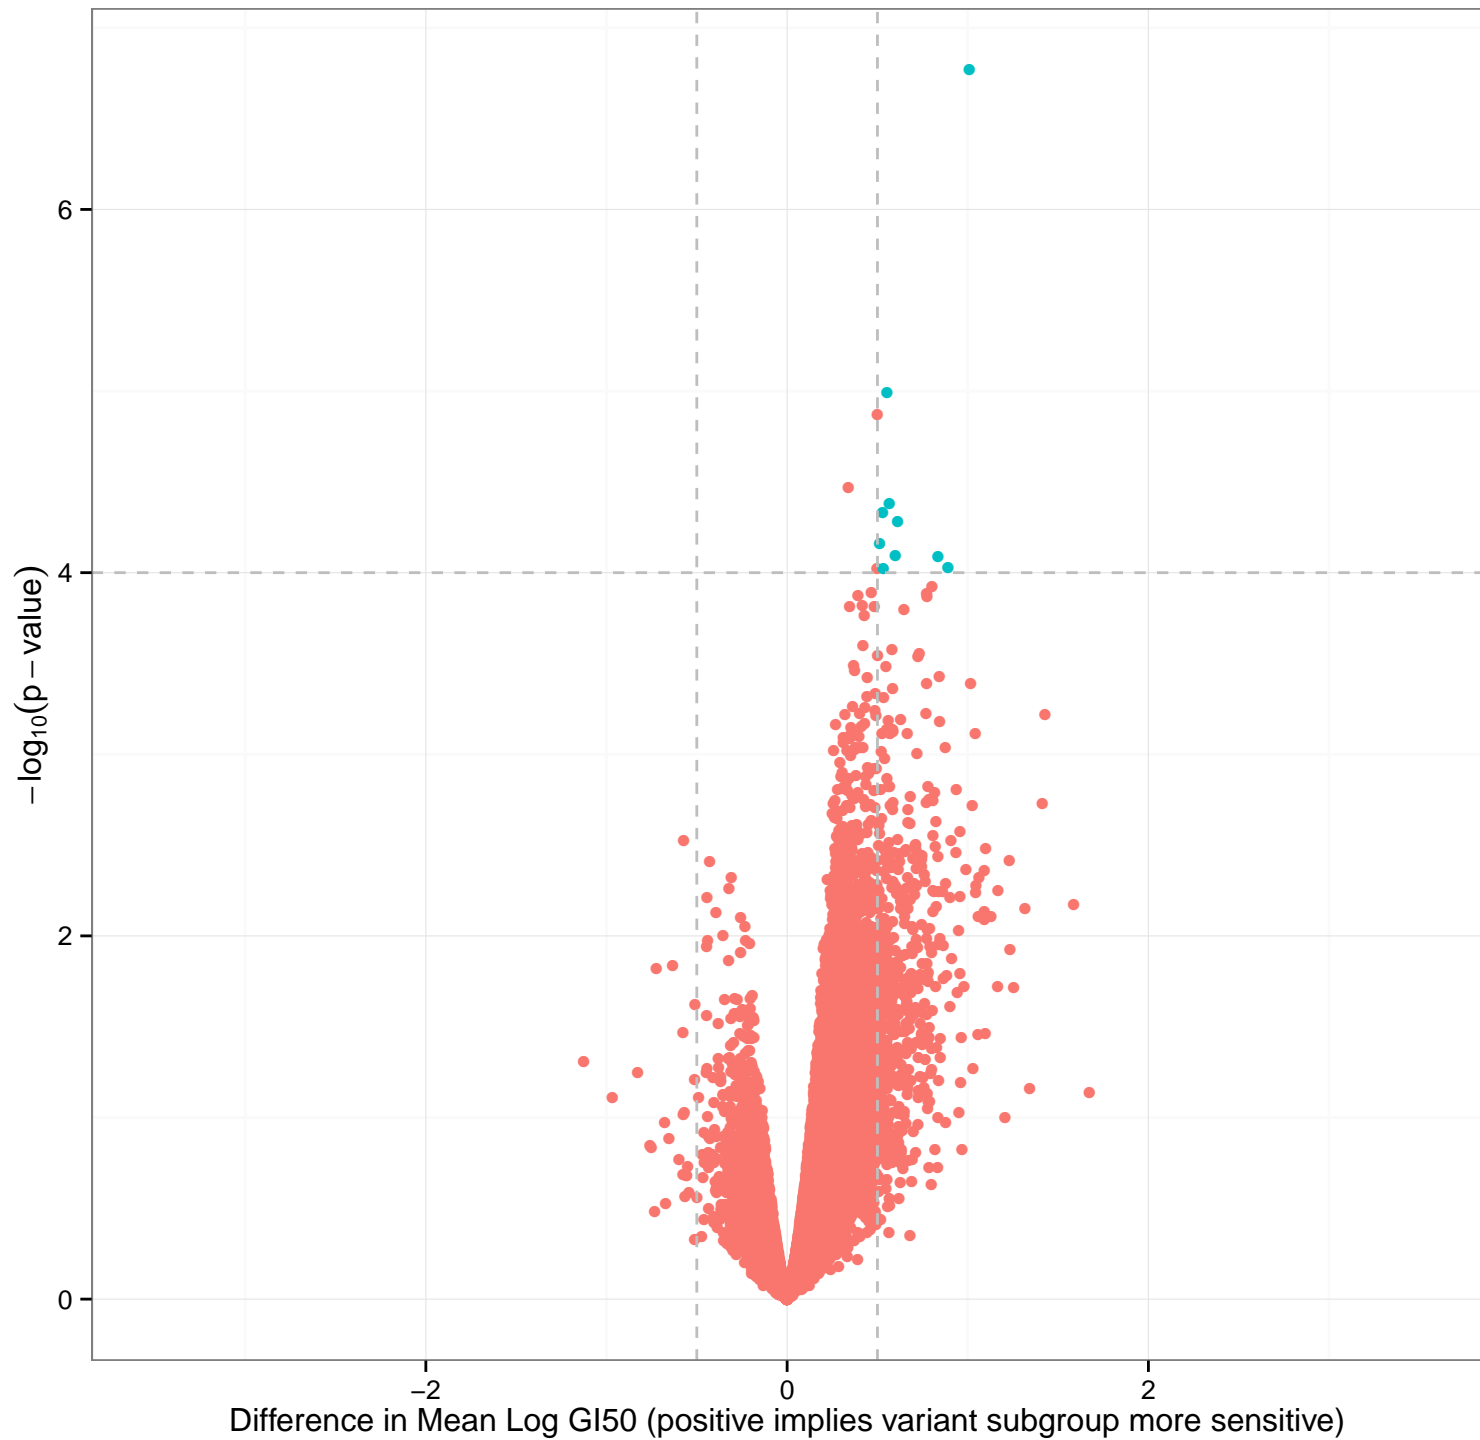

# NOTCH3

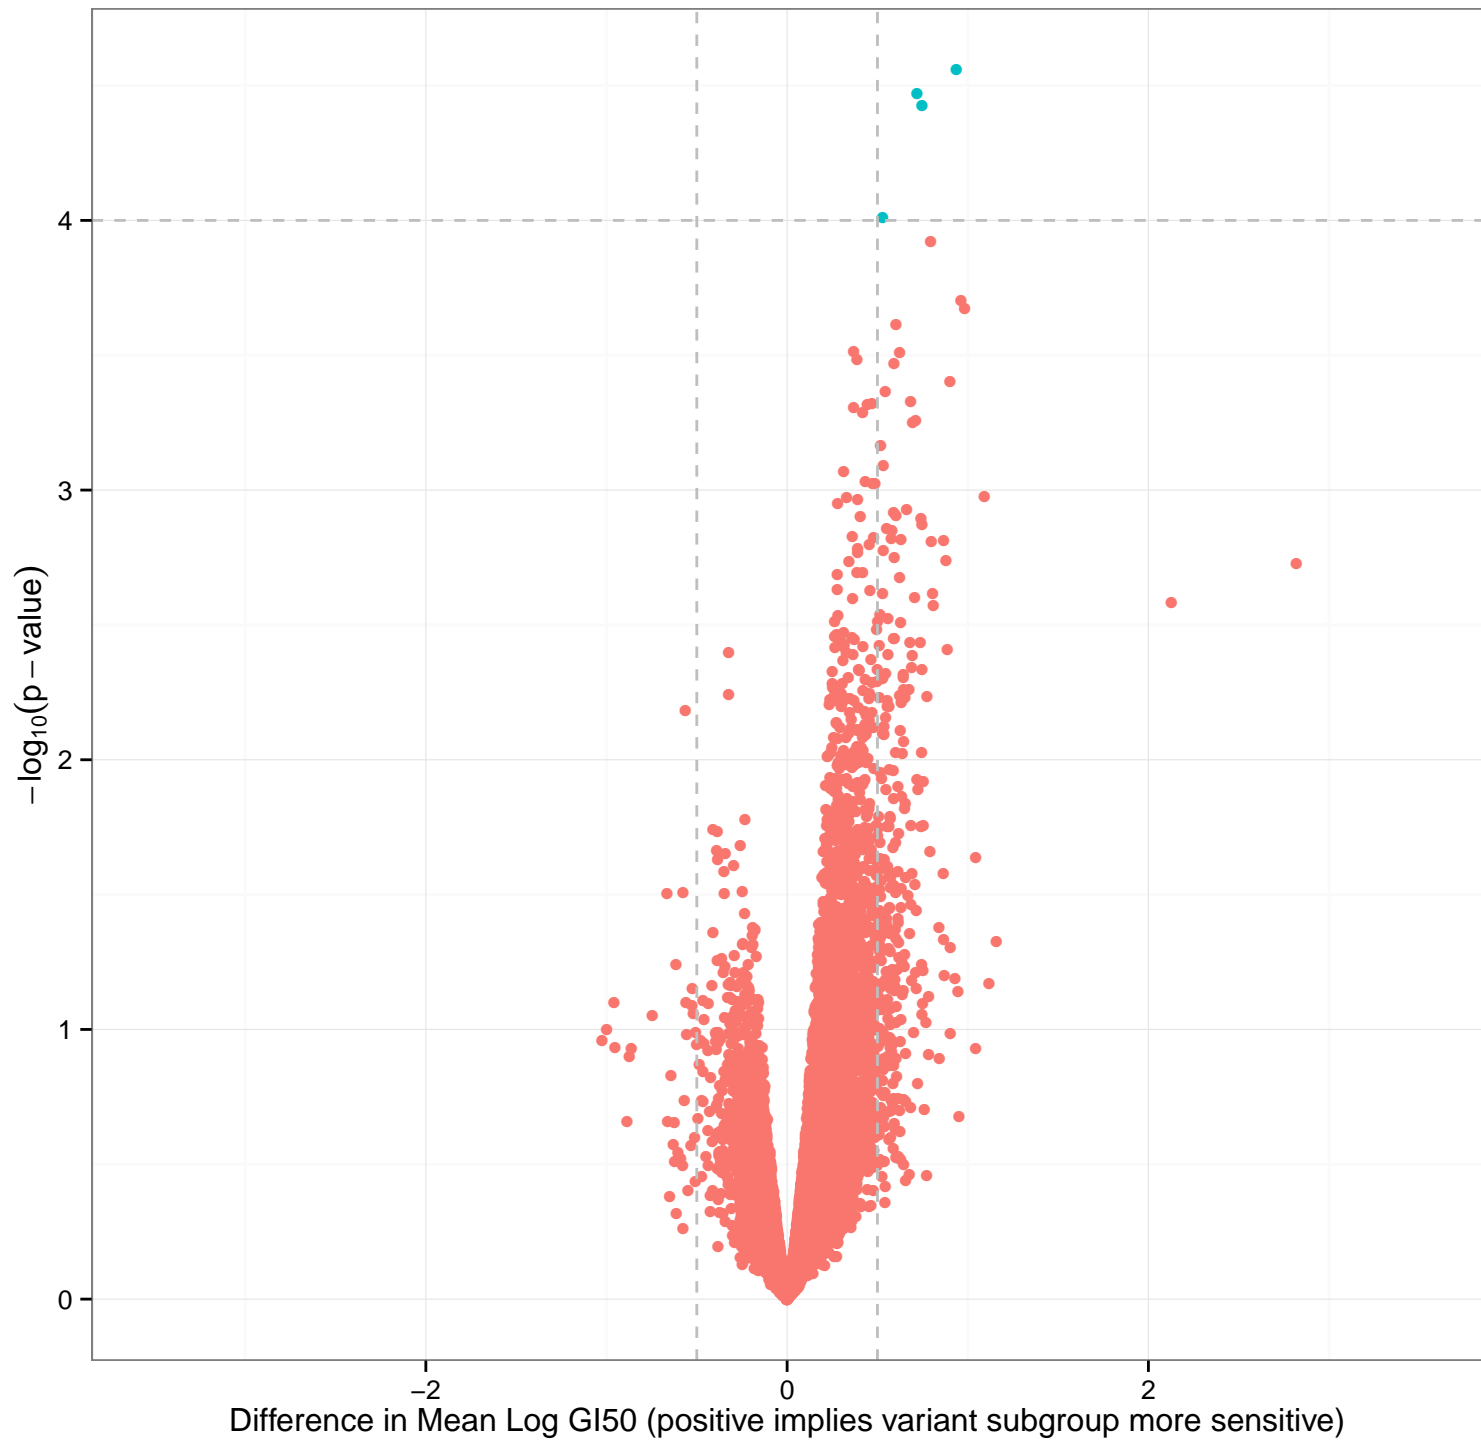

# NTRK2

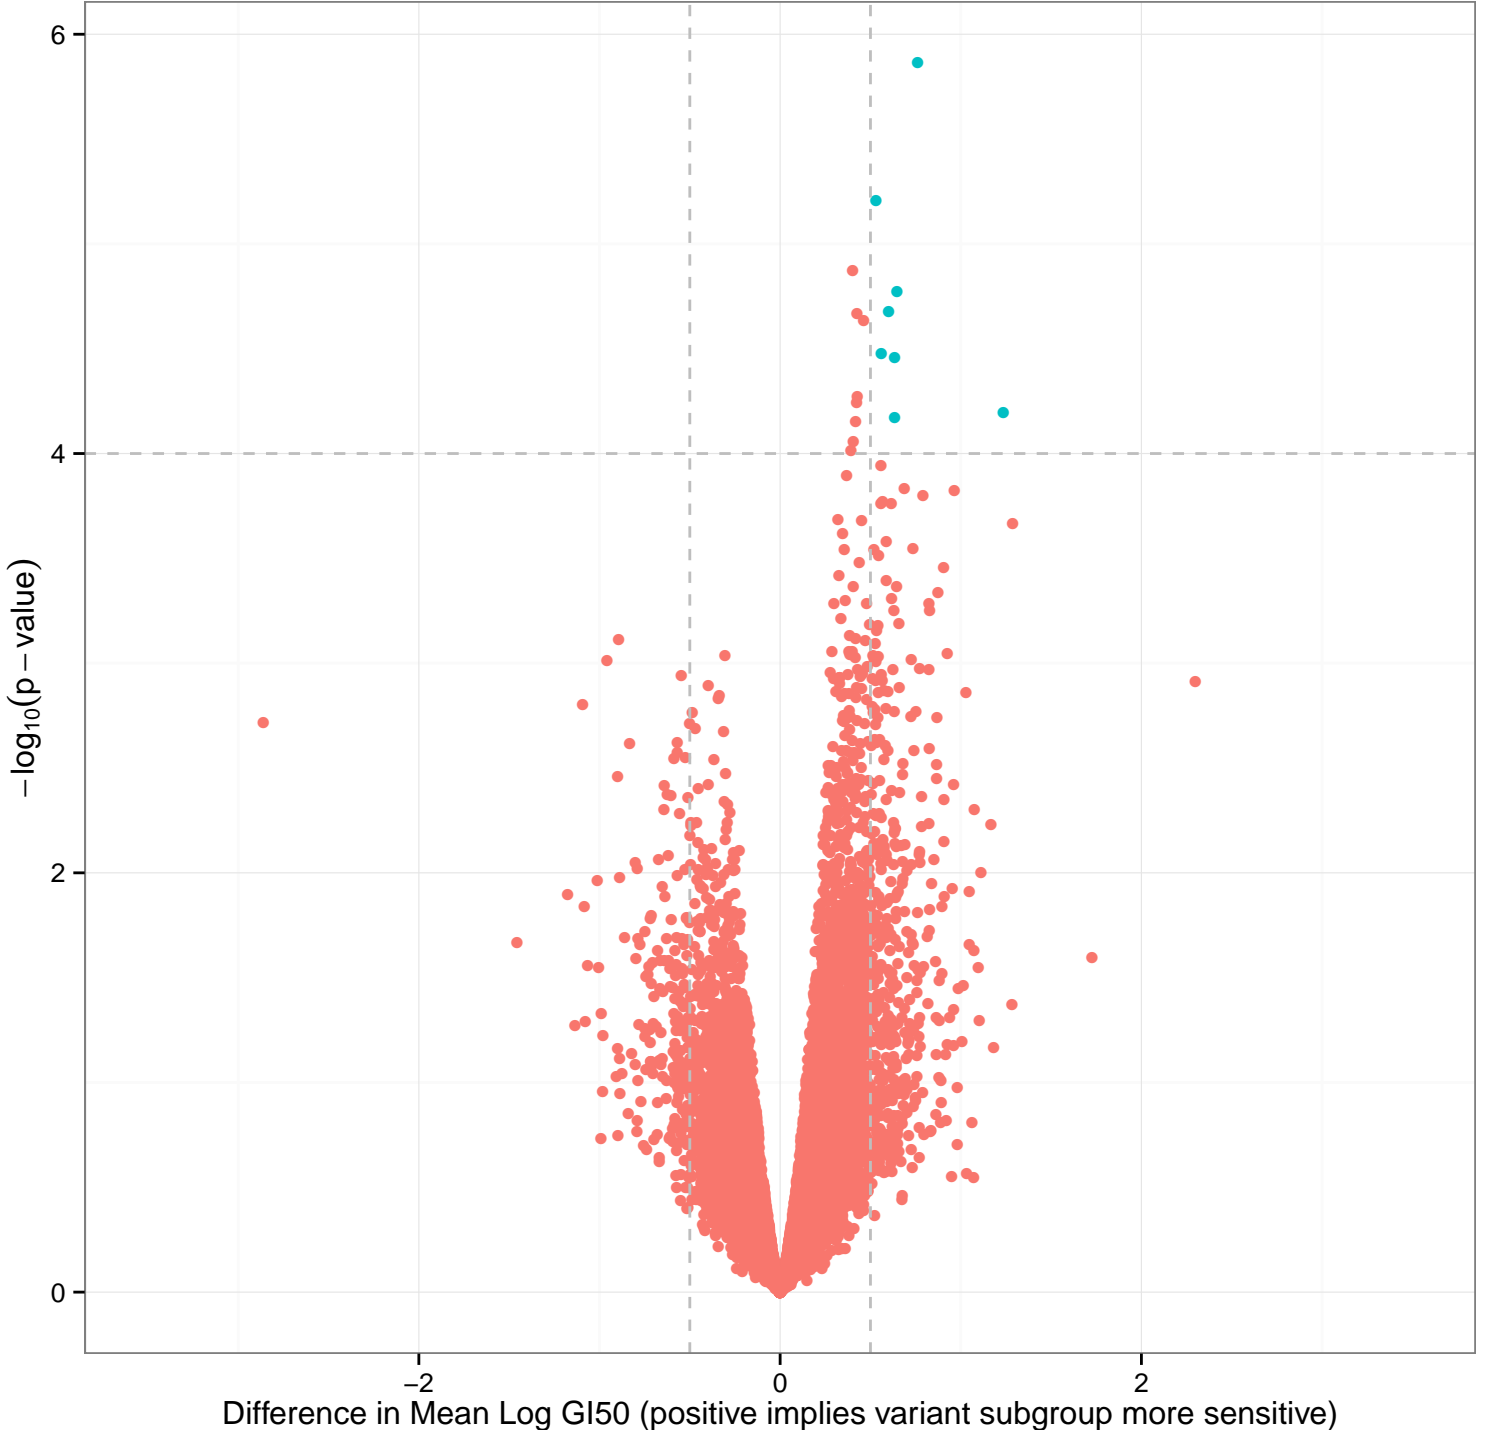

# PDGFRA

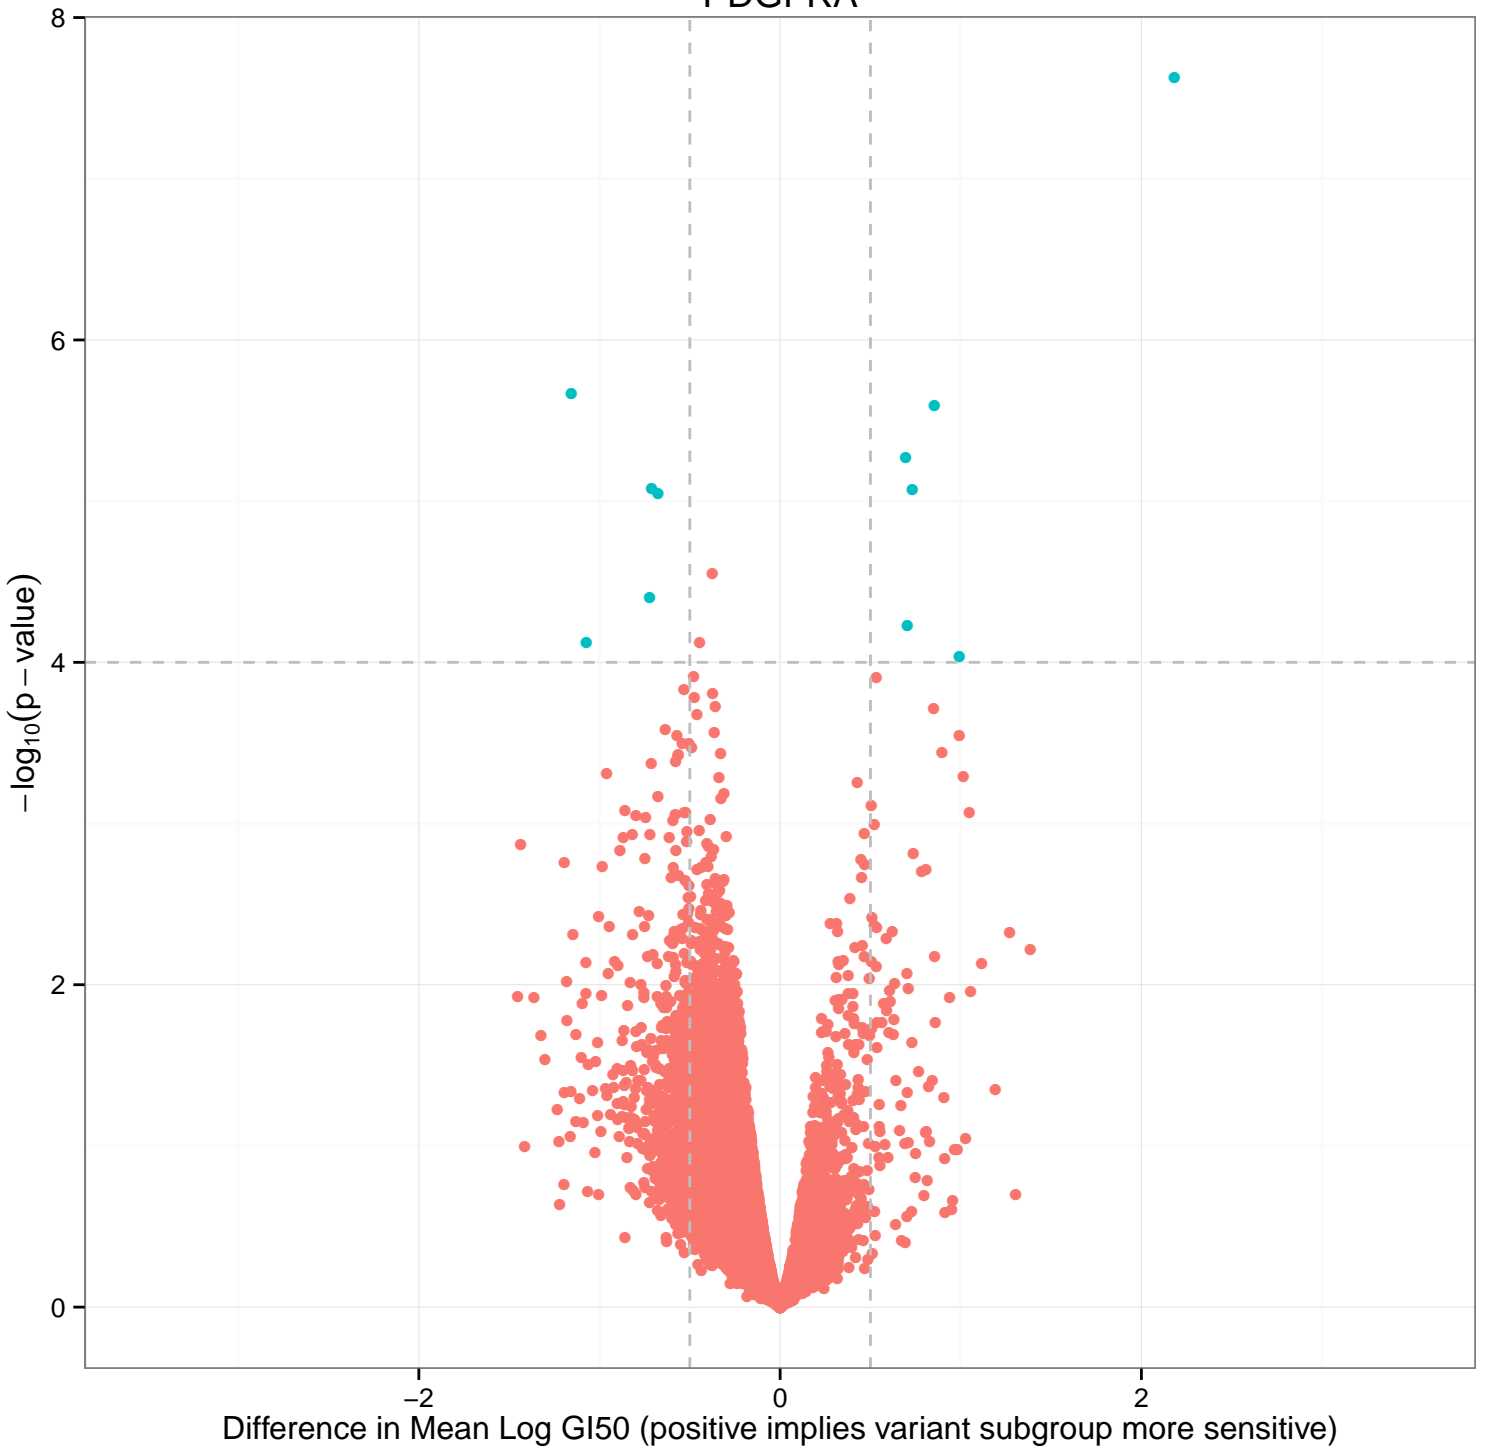

# PIK3CA

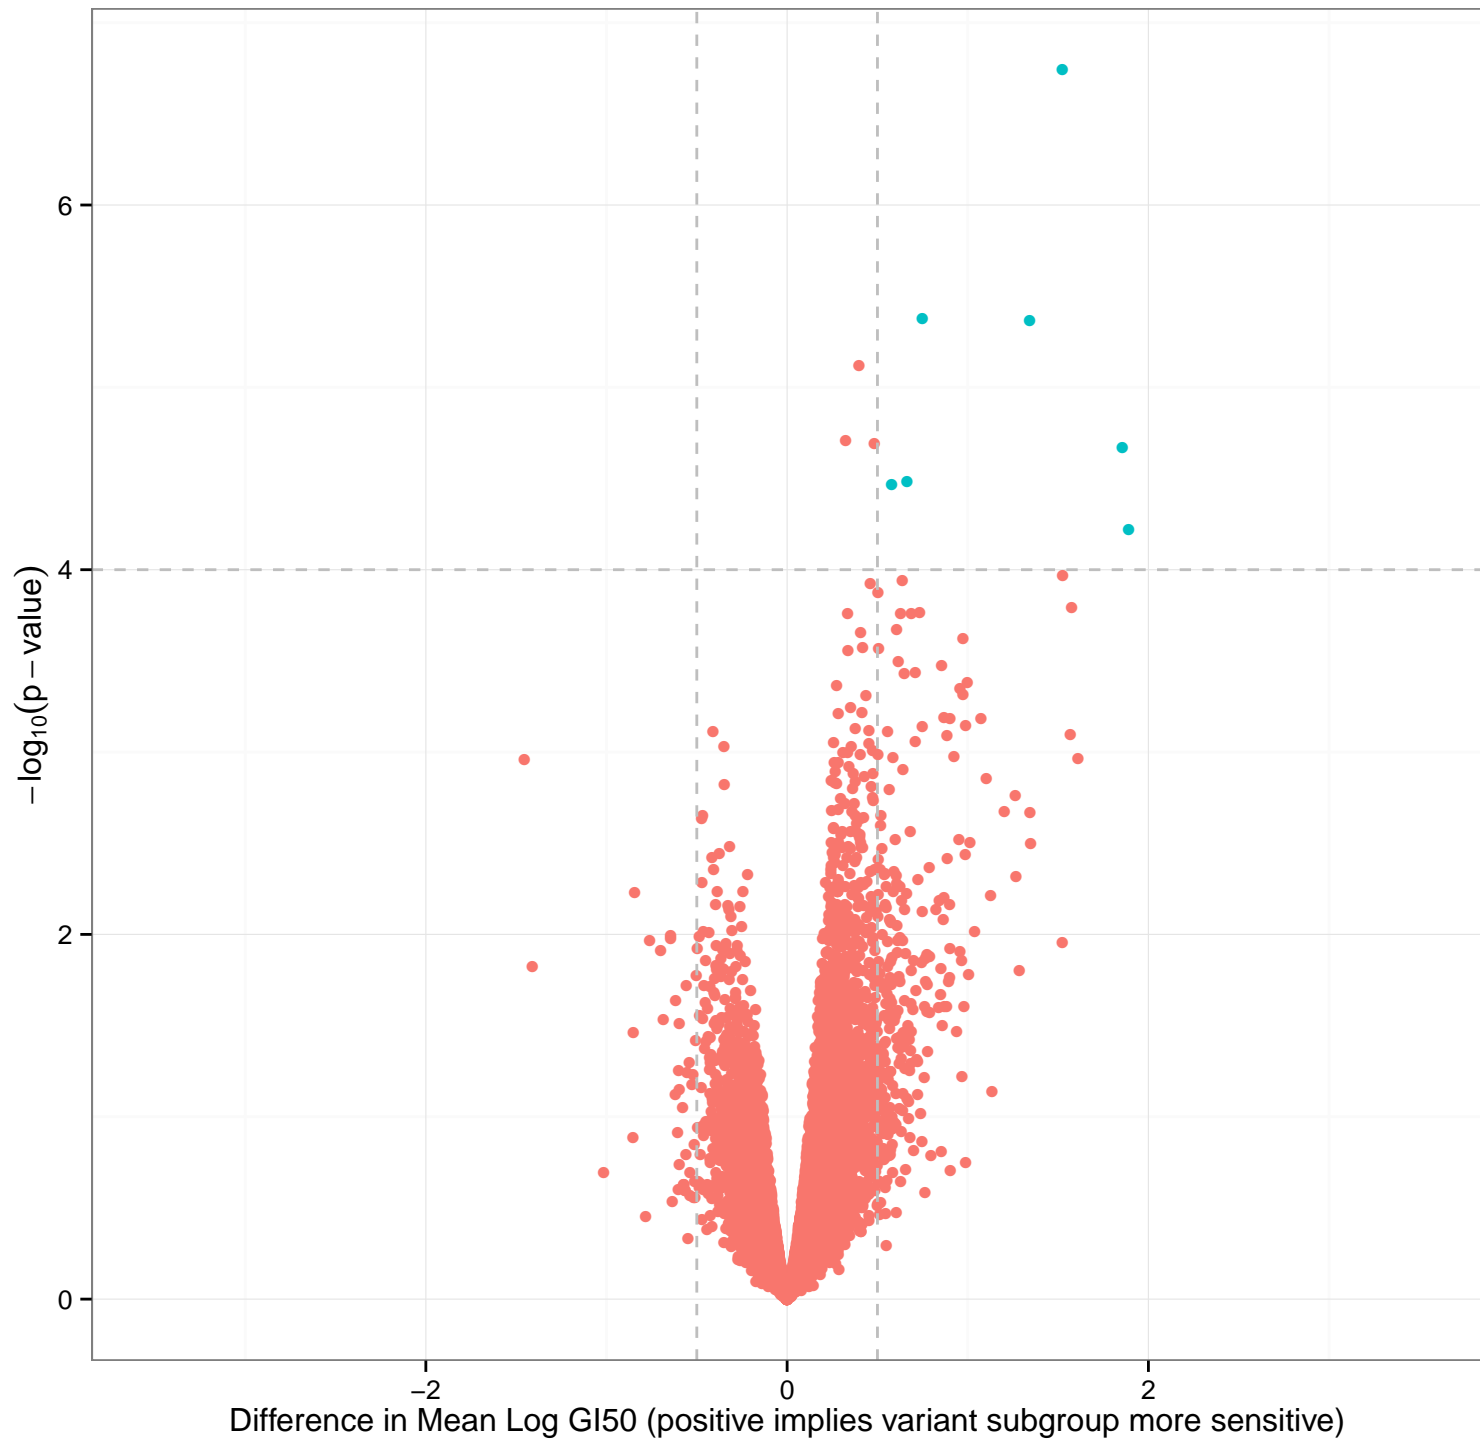

# PIK3CB

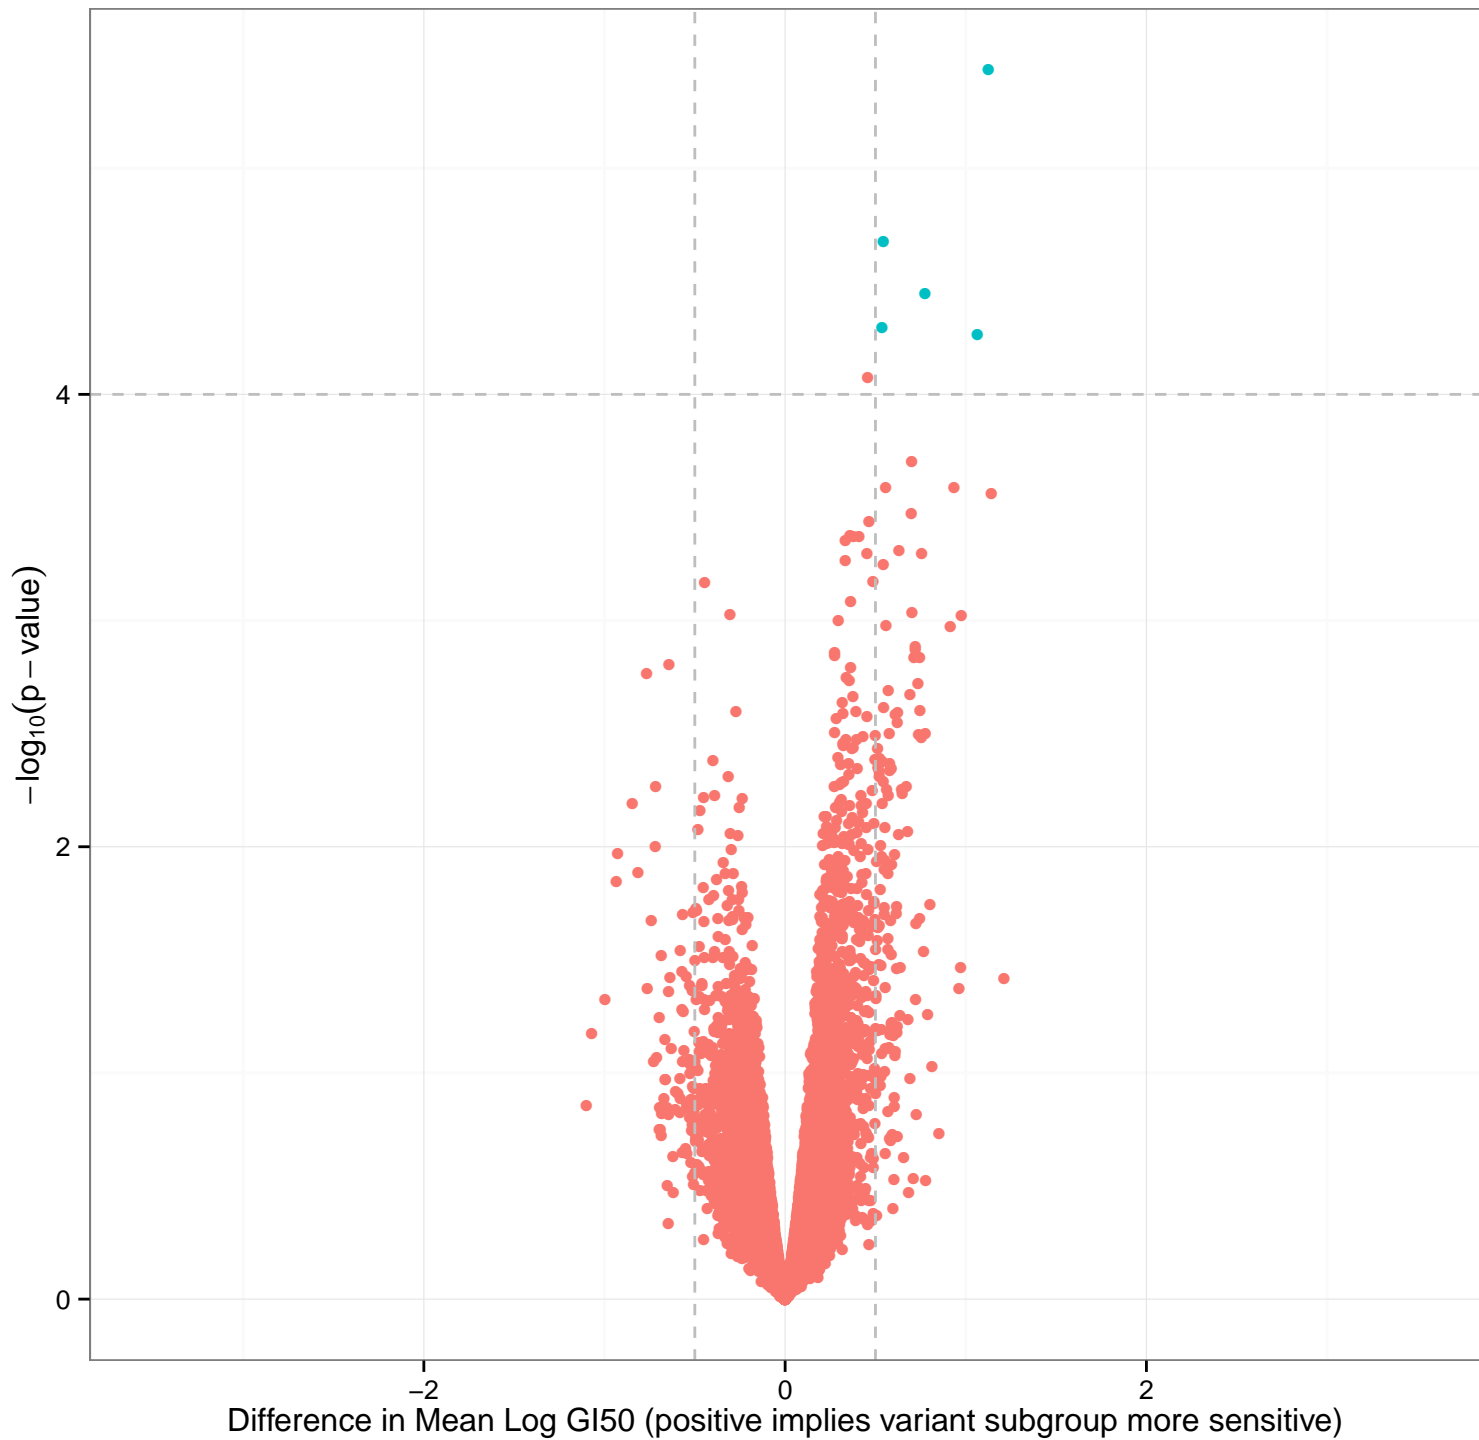

# PKHD1

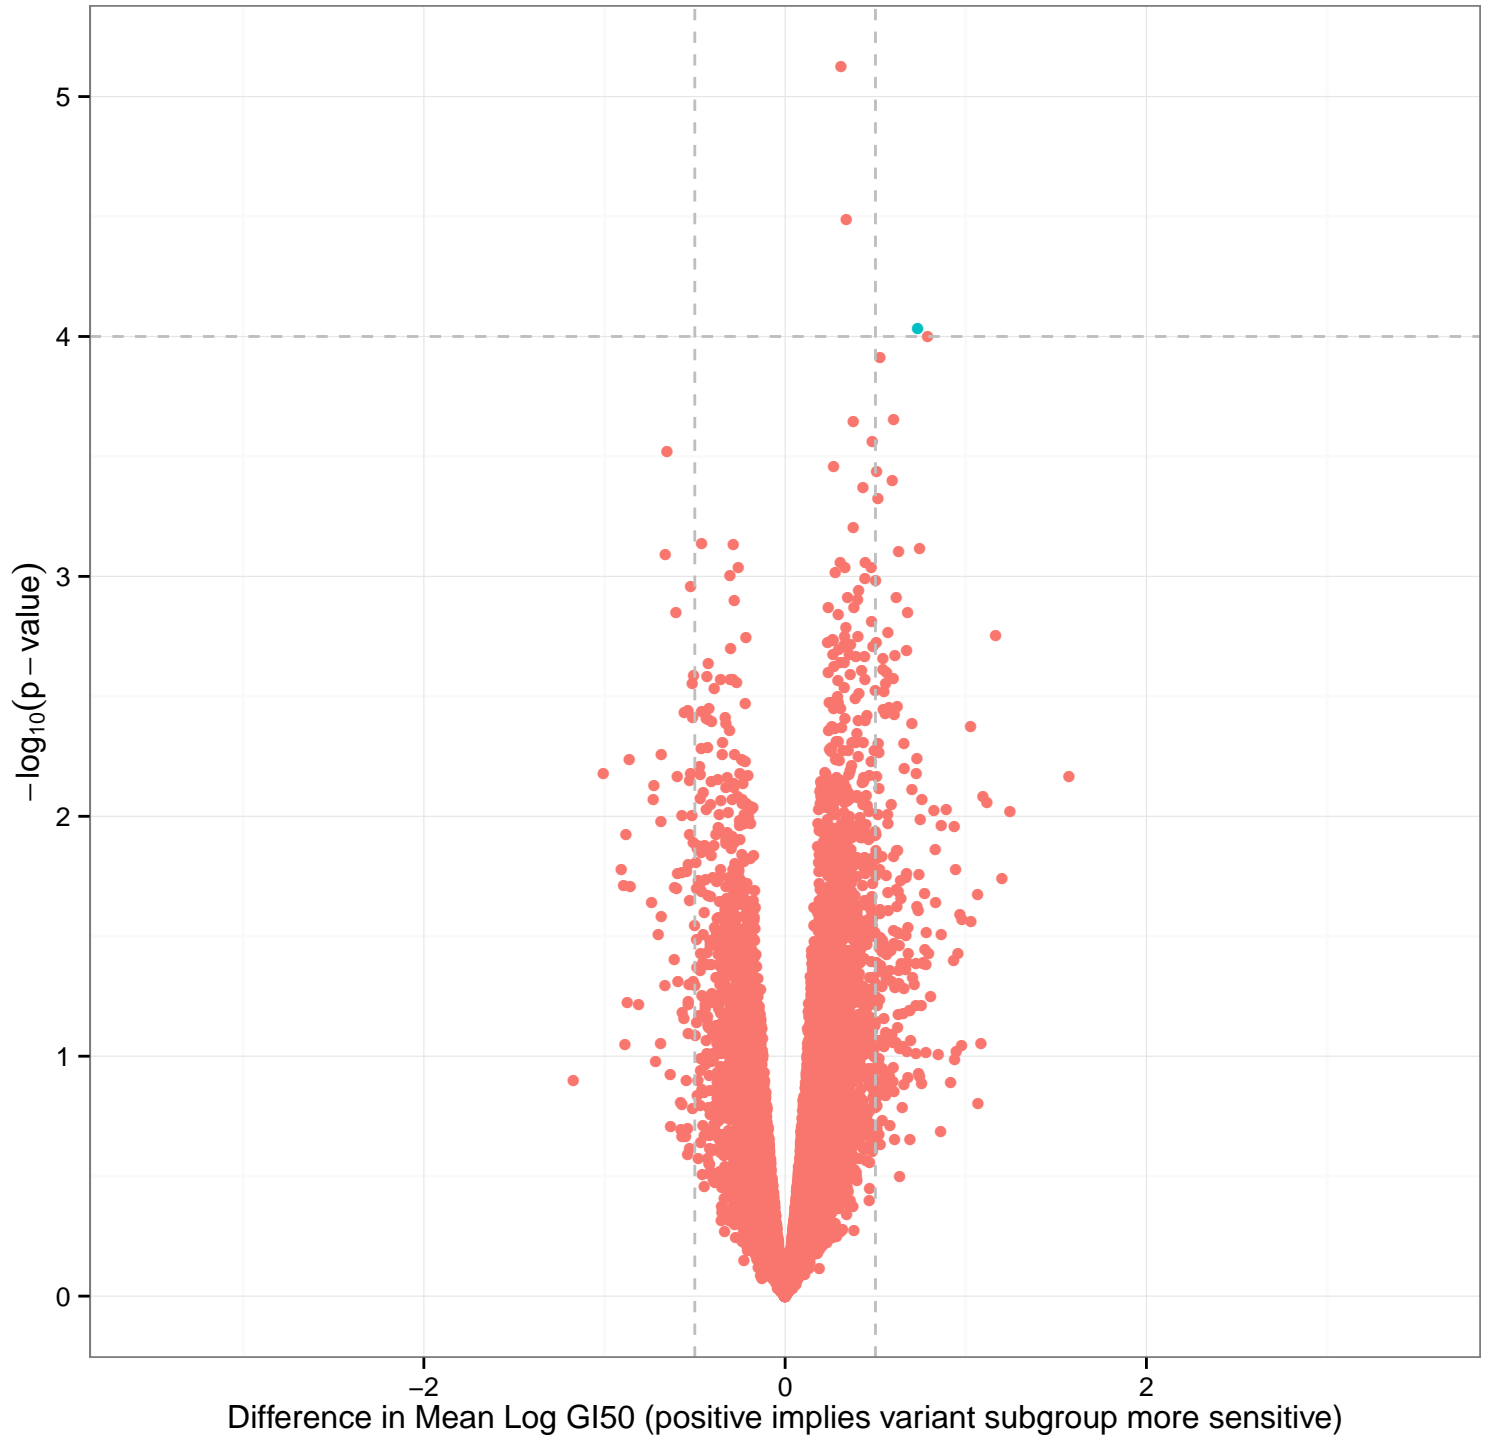

# POLE

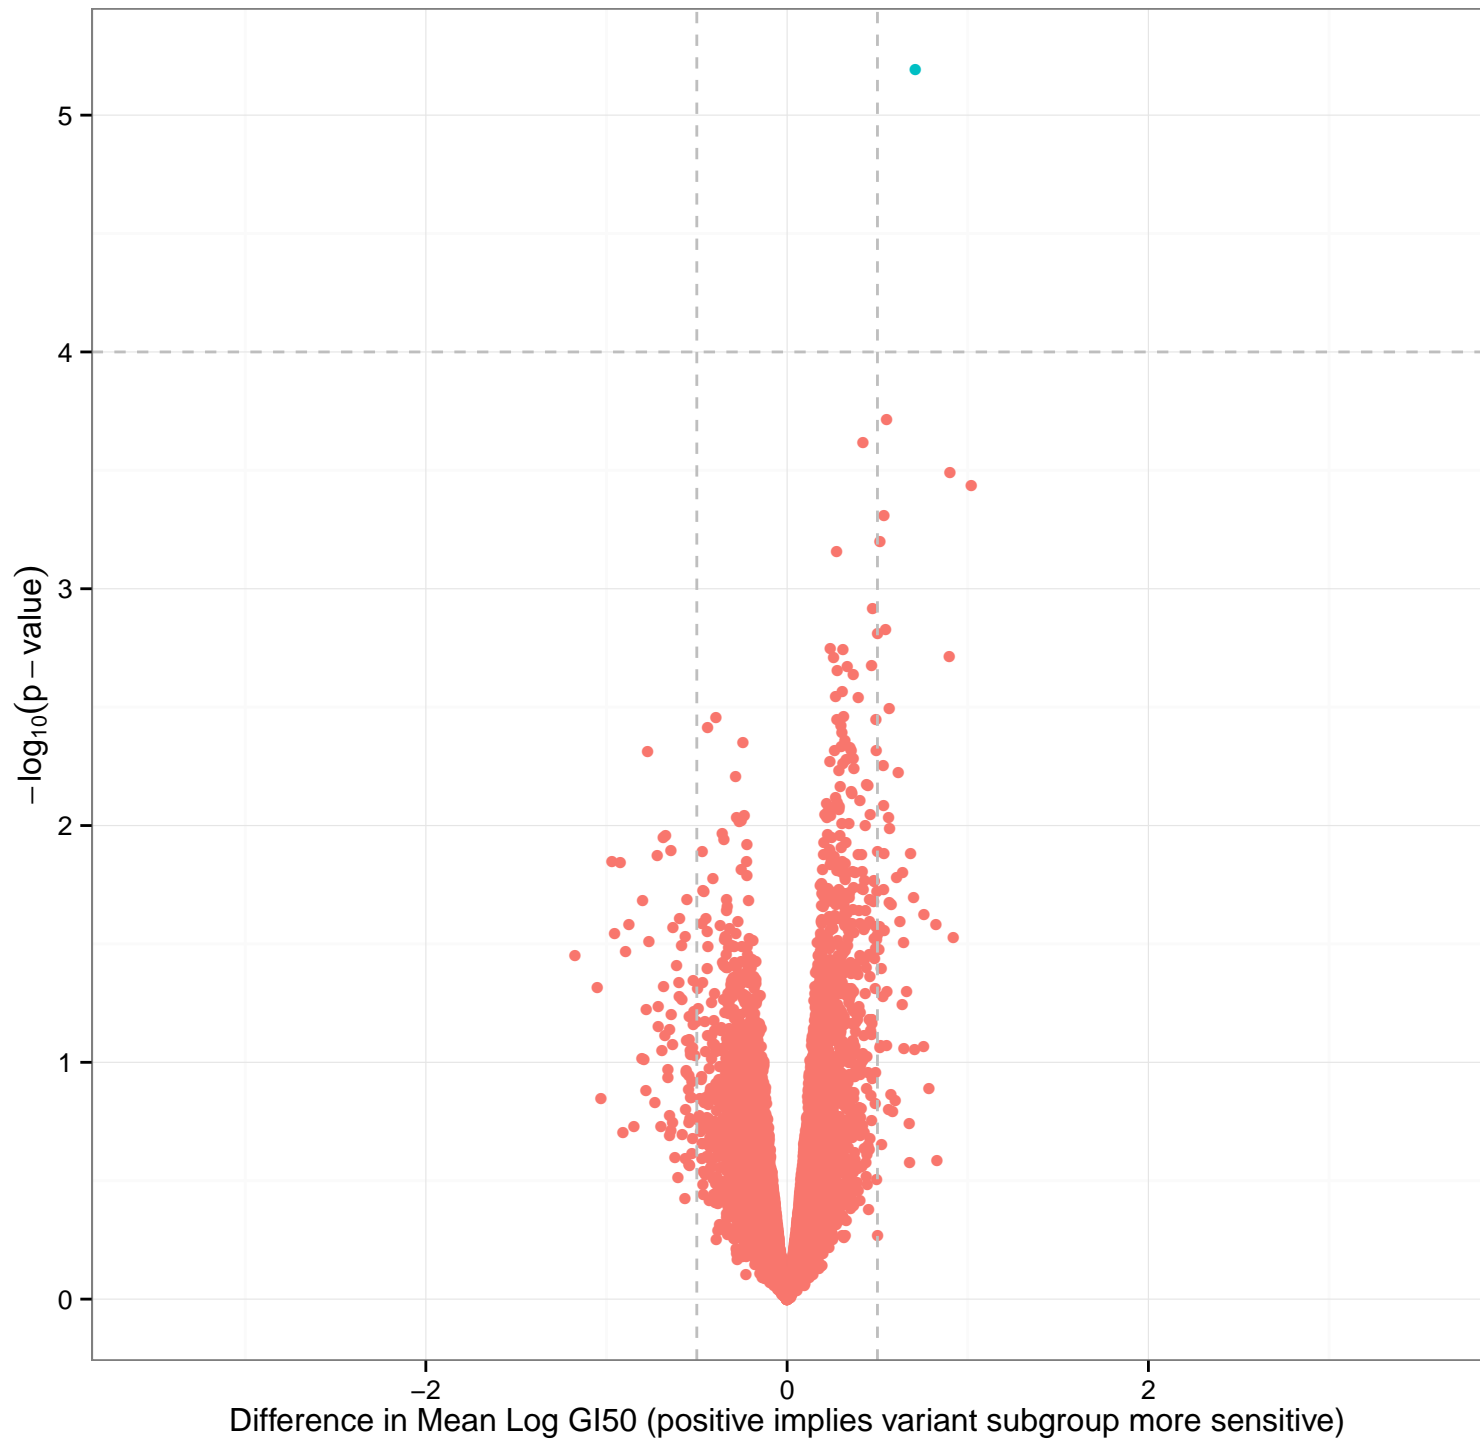





RET

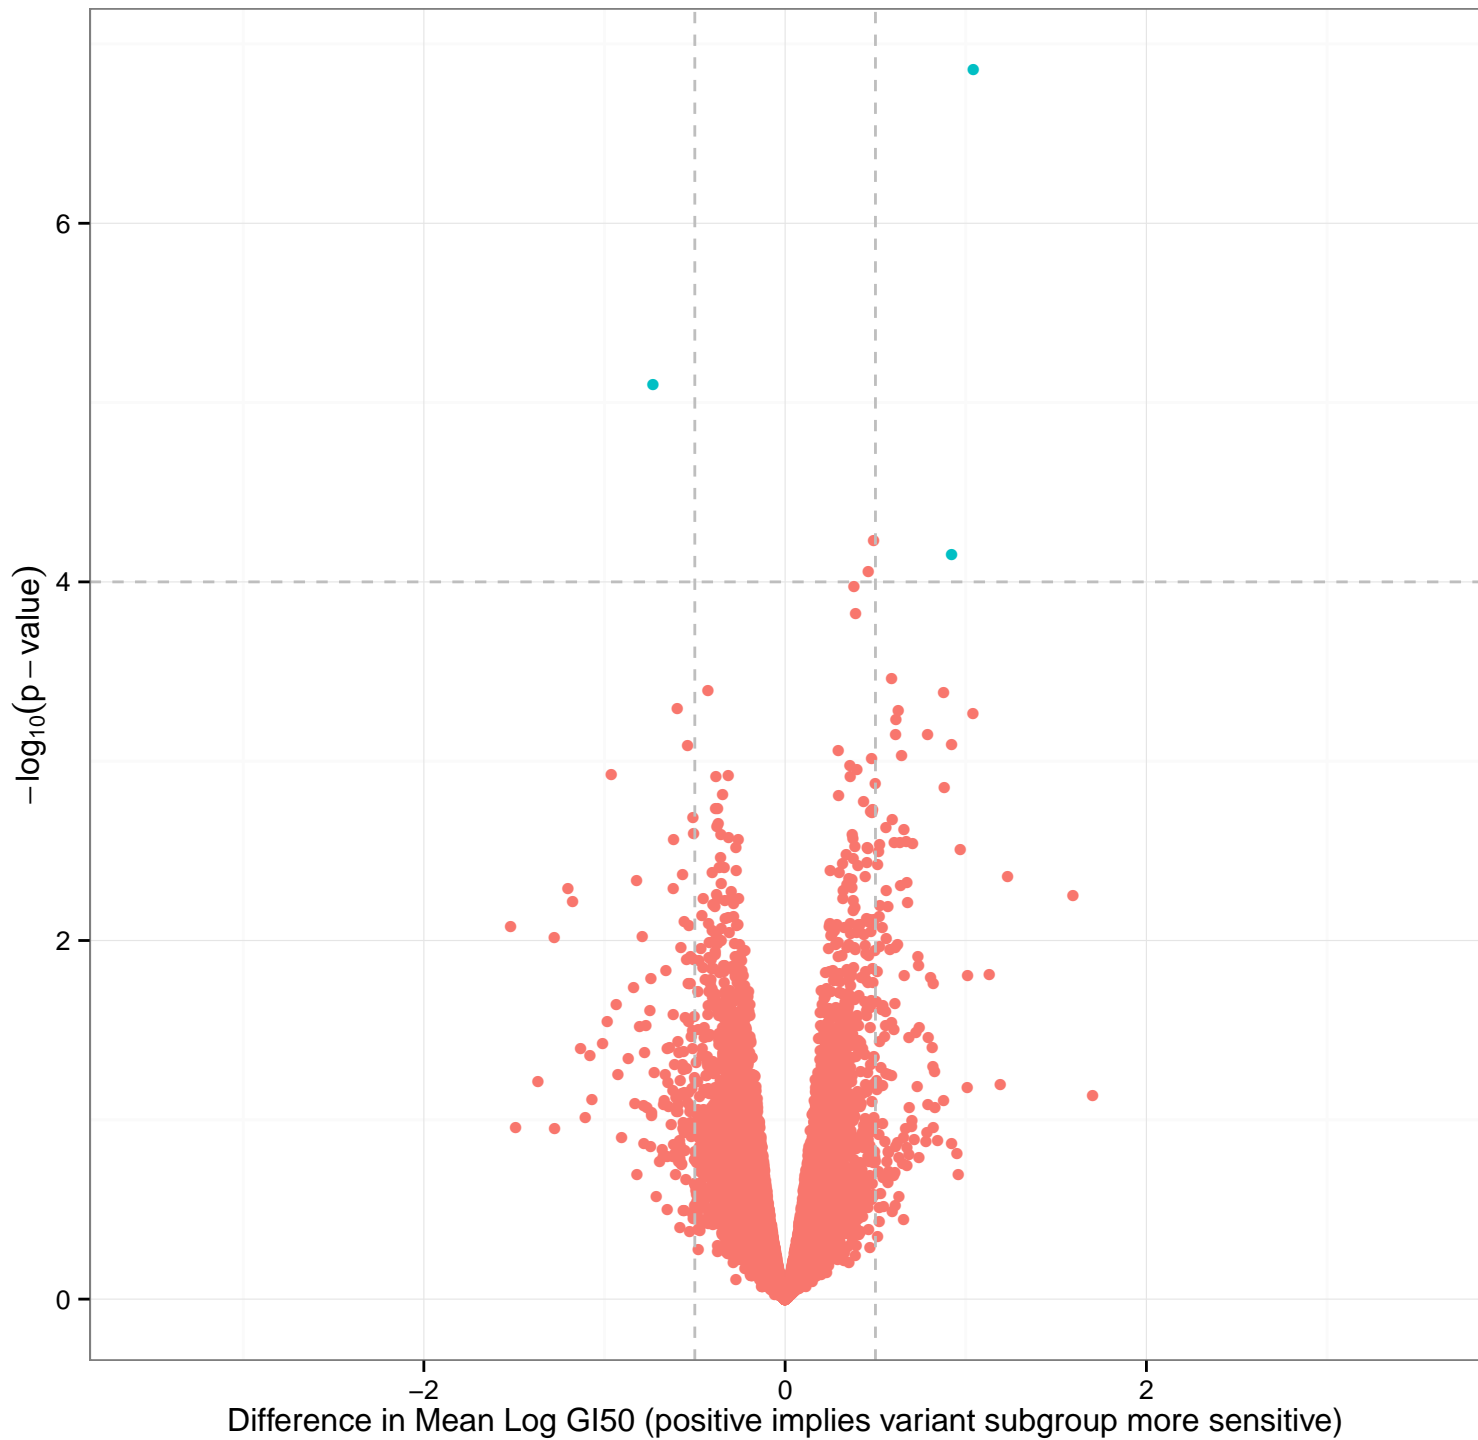

# RETNLB

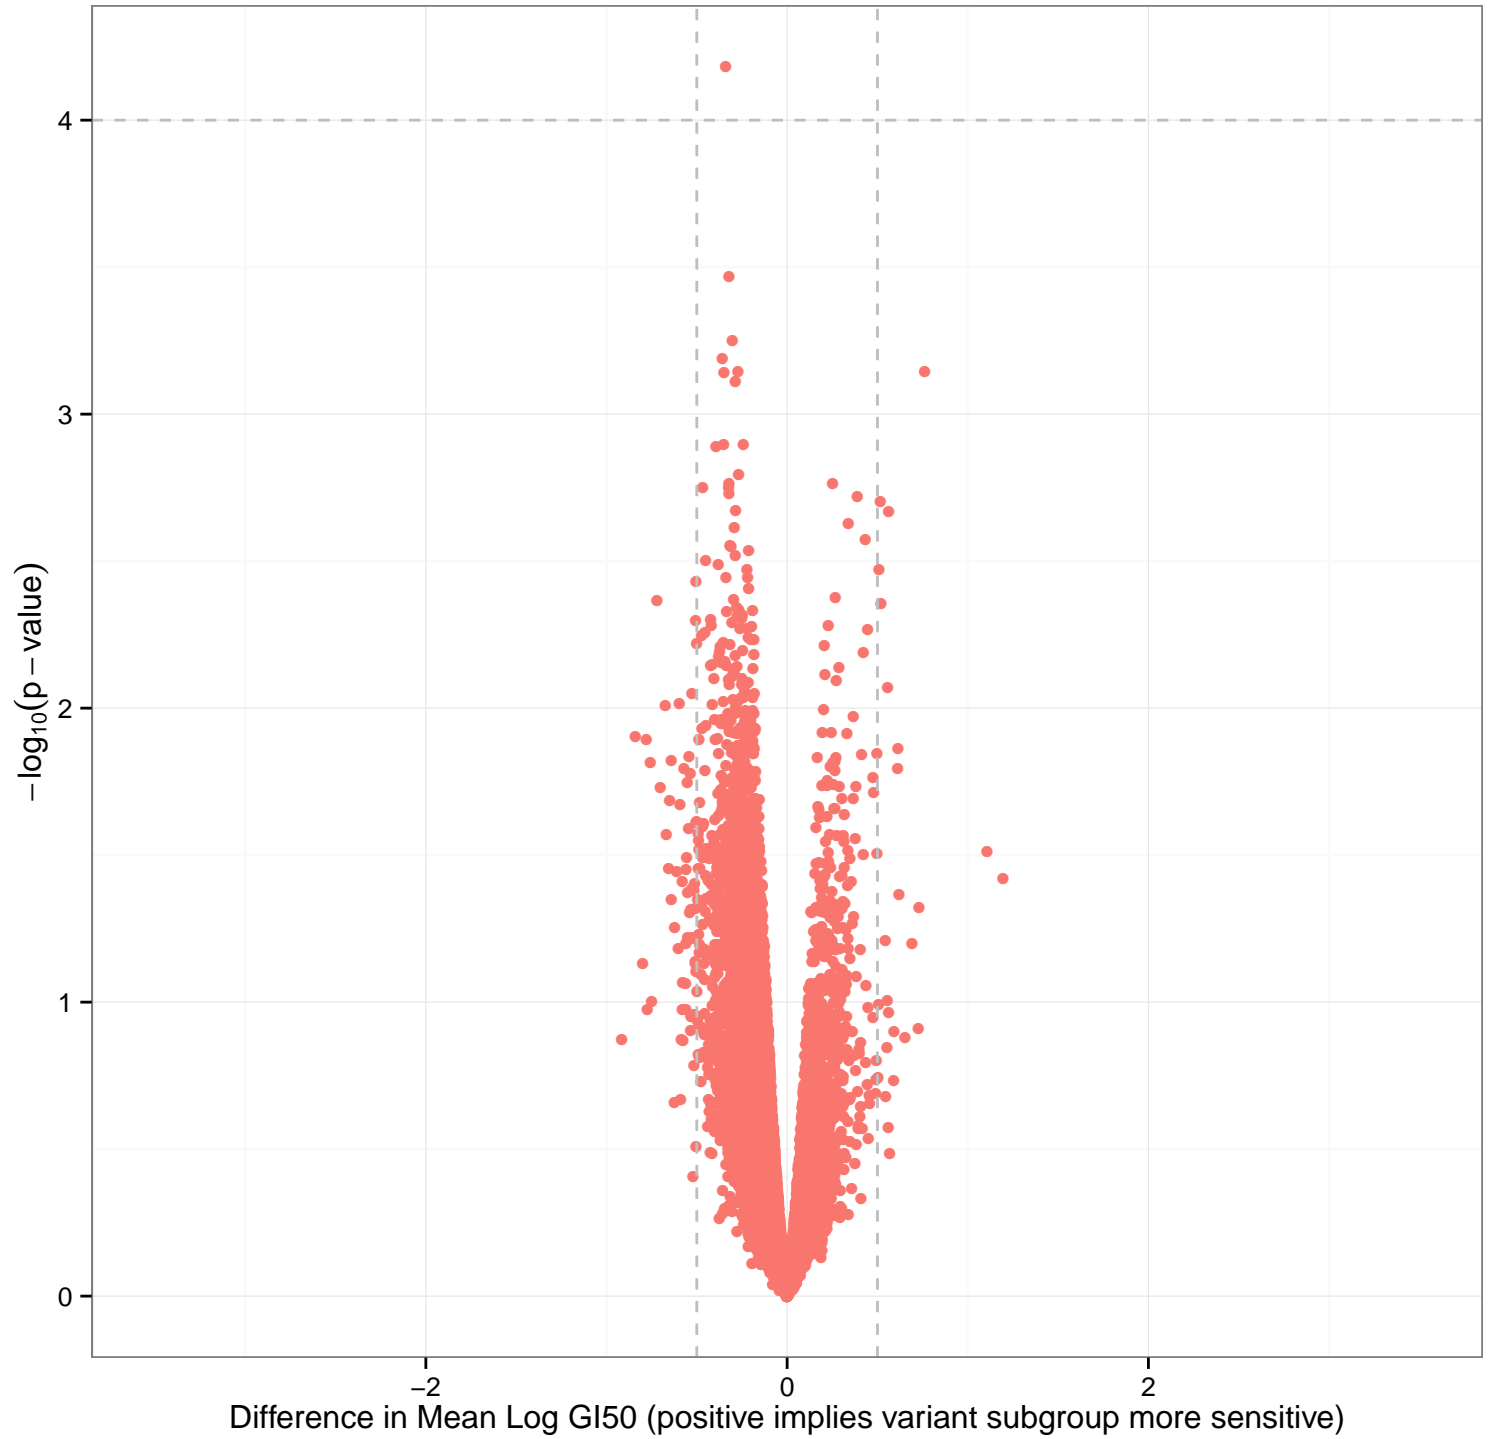

# SMARCA4

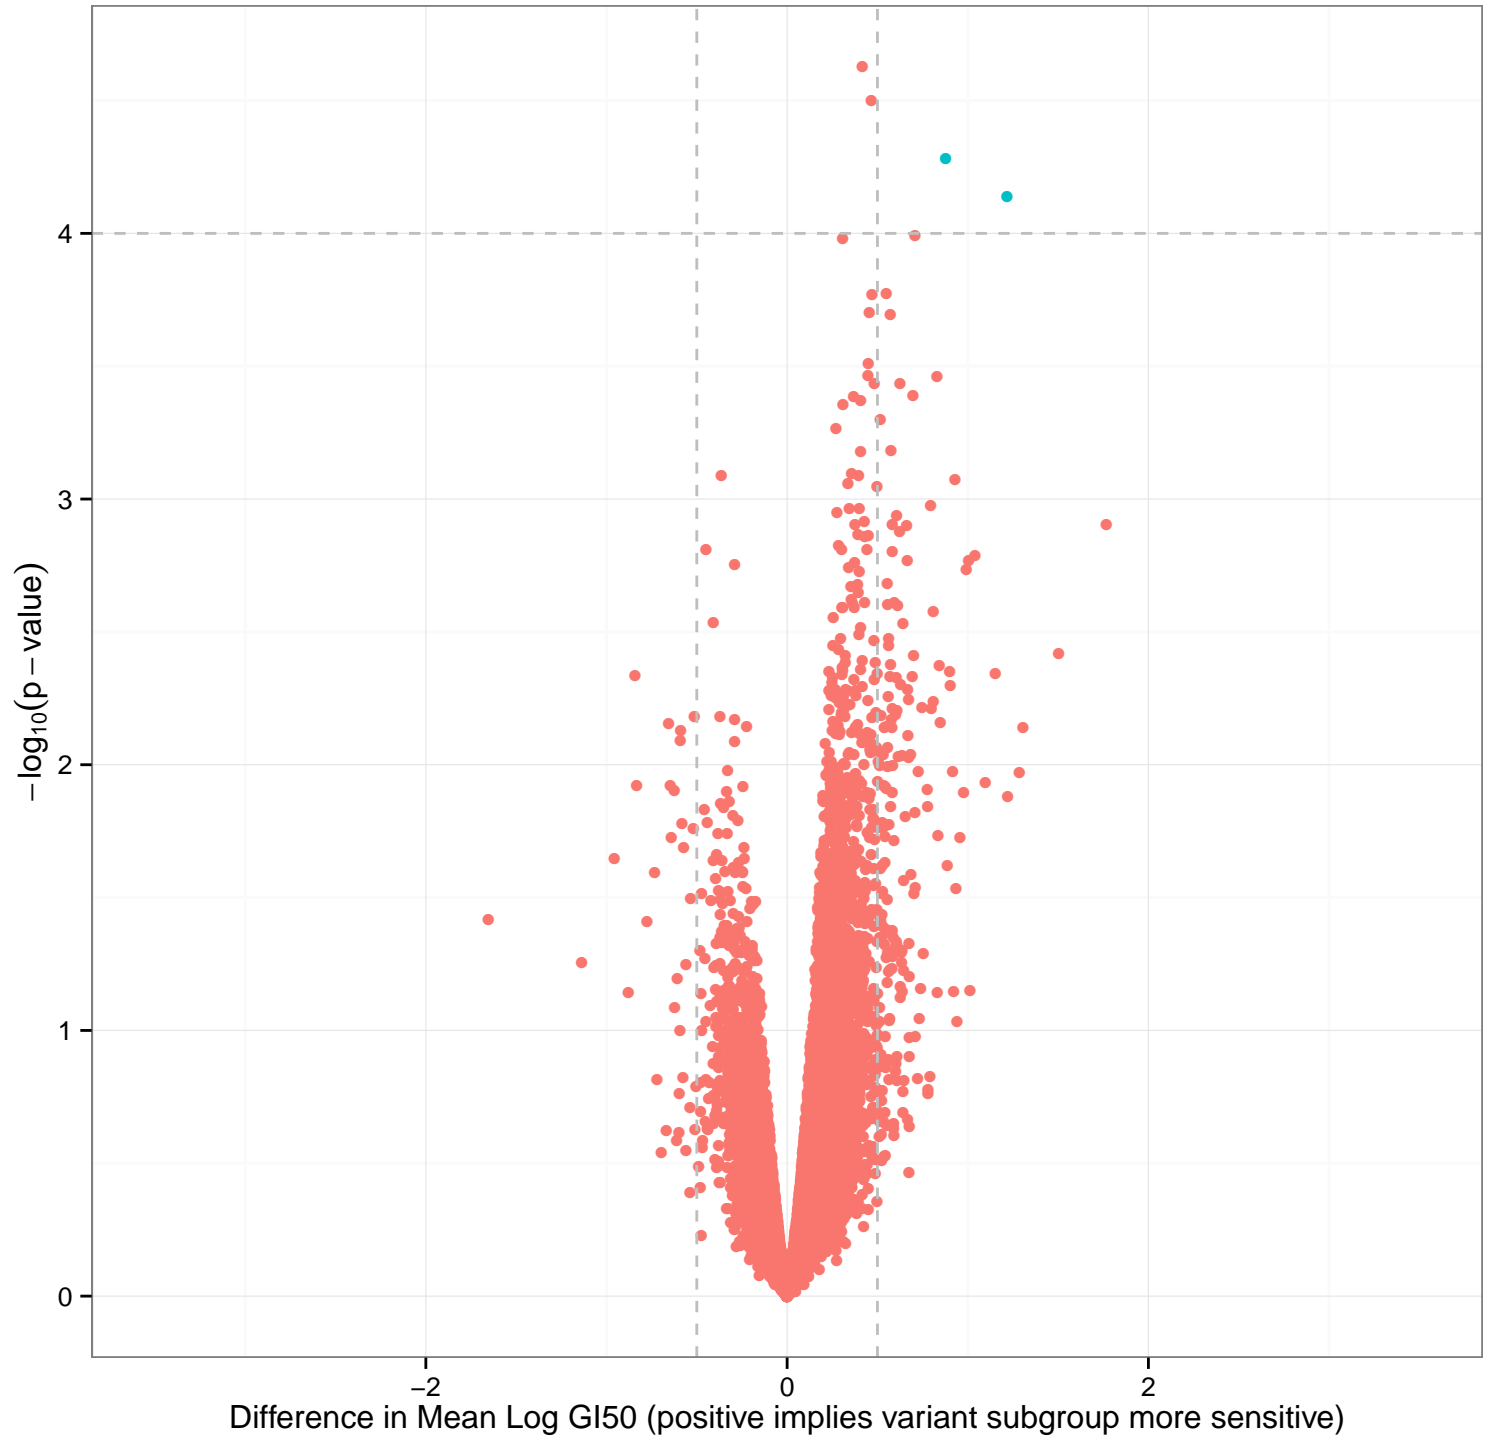

# TP53

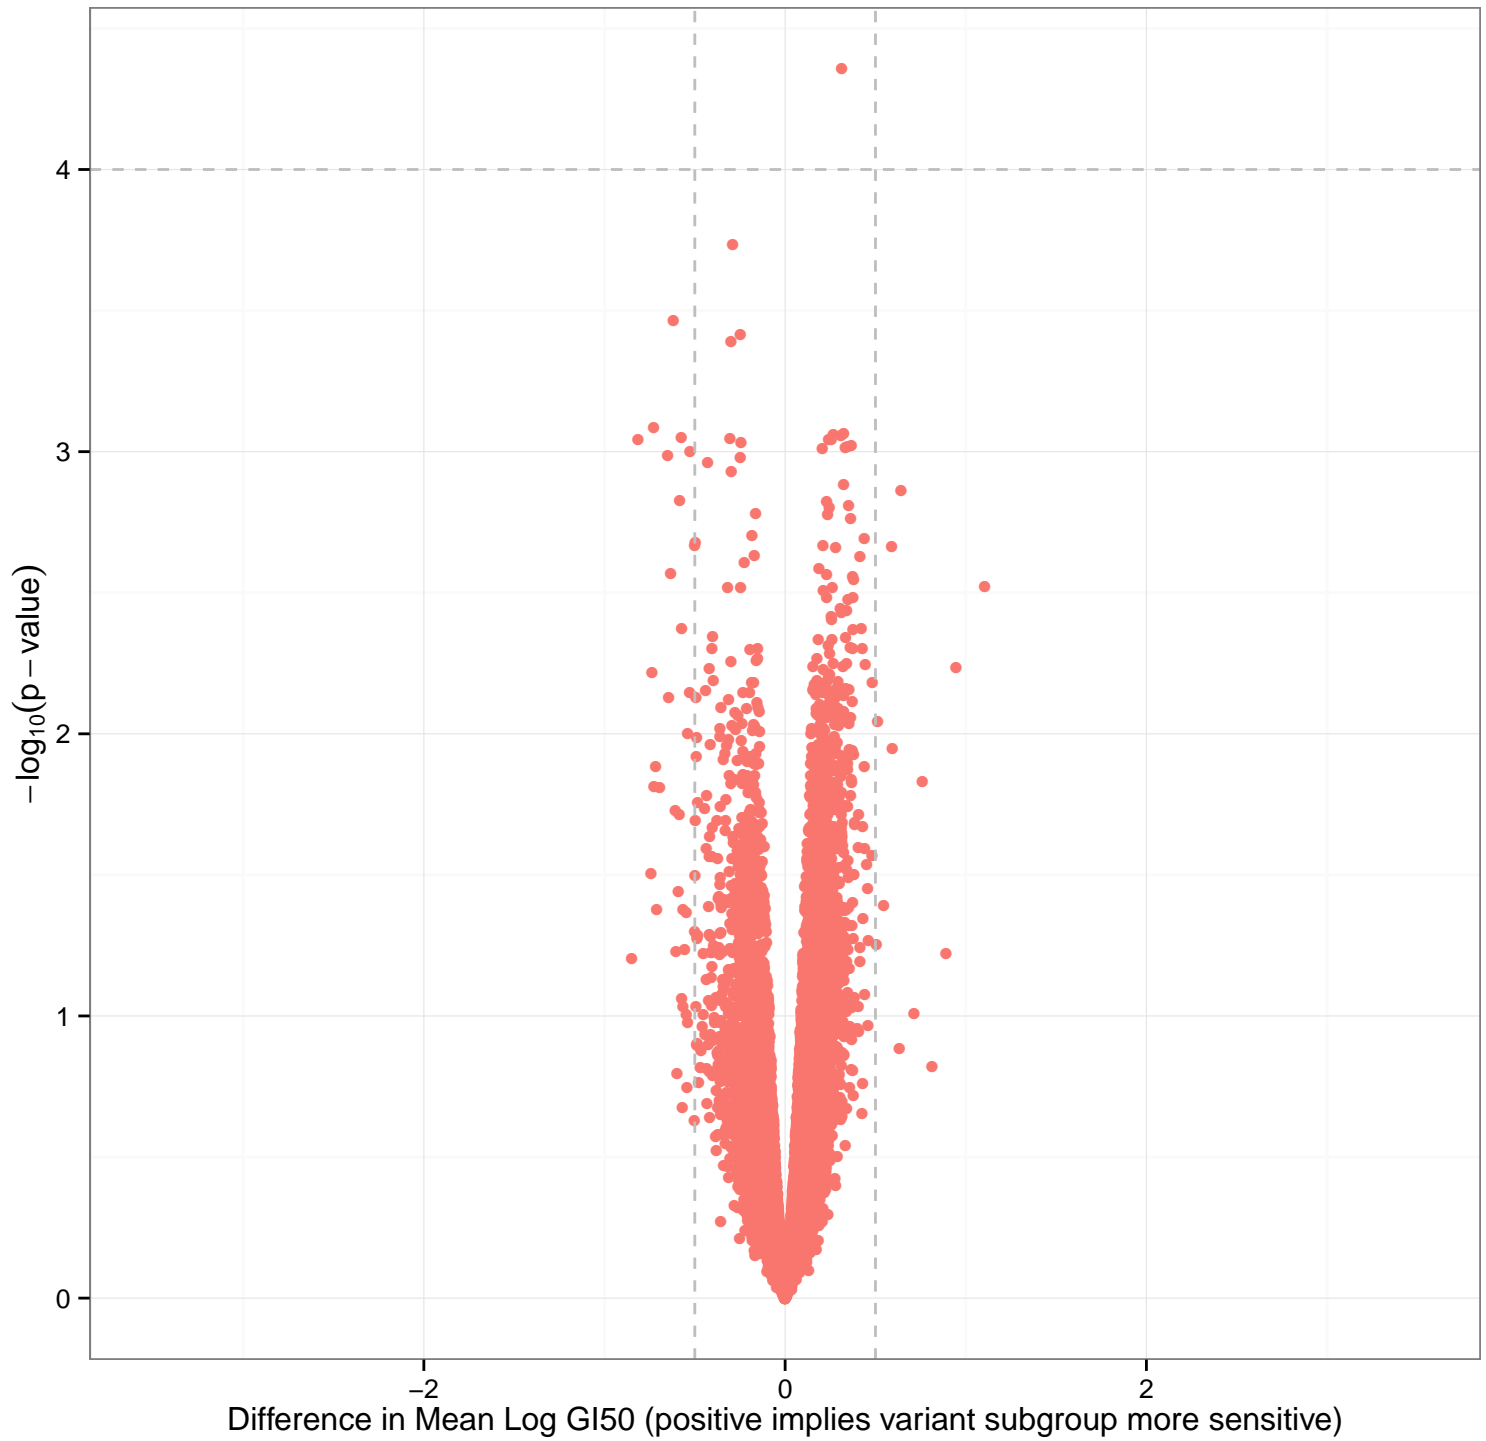

# TSC2

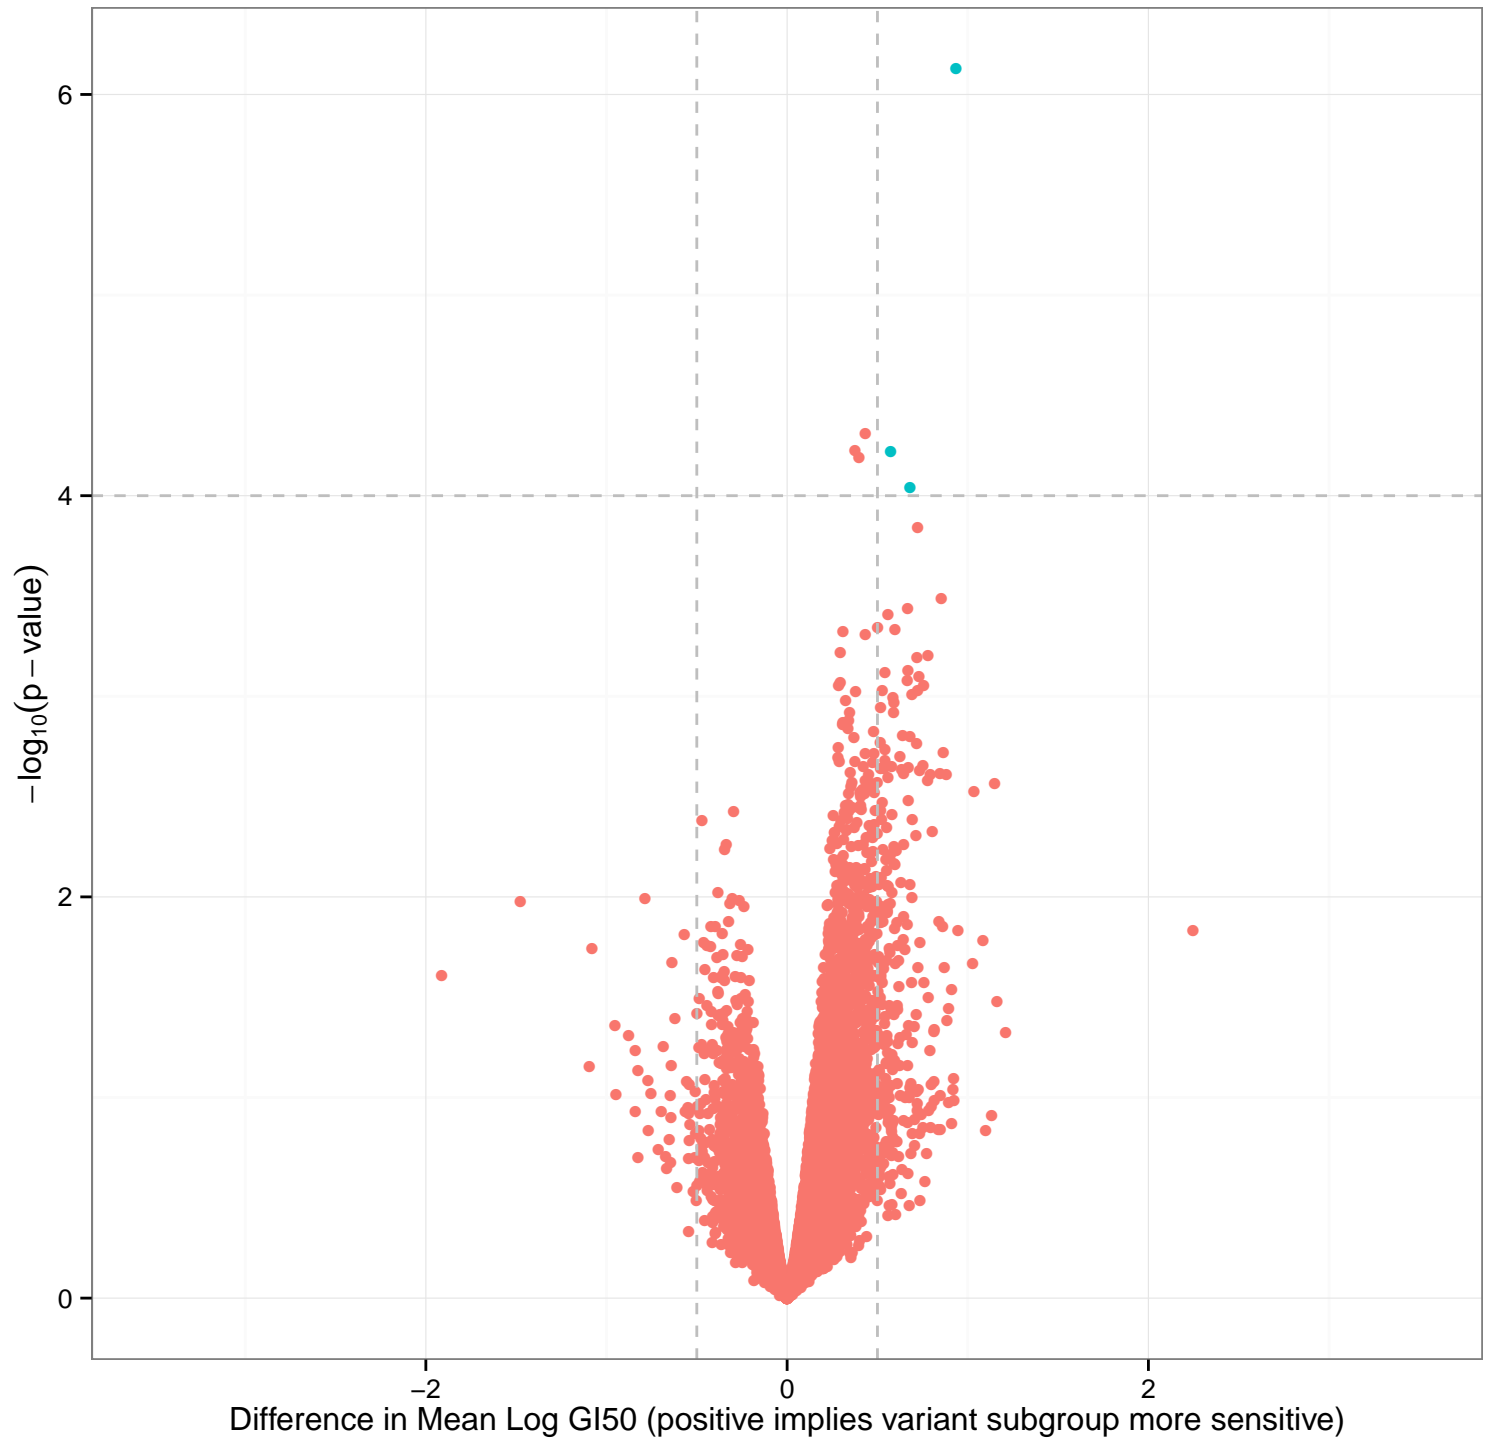

Supplement: NIHMS484230-supplement-3.pdf [file NIHMS484230-supplement-3.pdf]
