# Supplementary material
Source: PubMed Central journal article supplement (PMC4893961)

# NSC-122758 (Tretinoin)

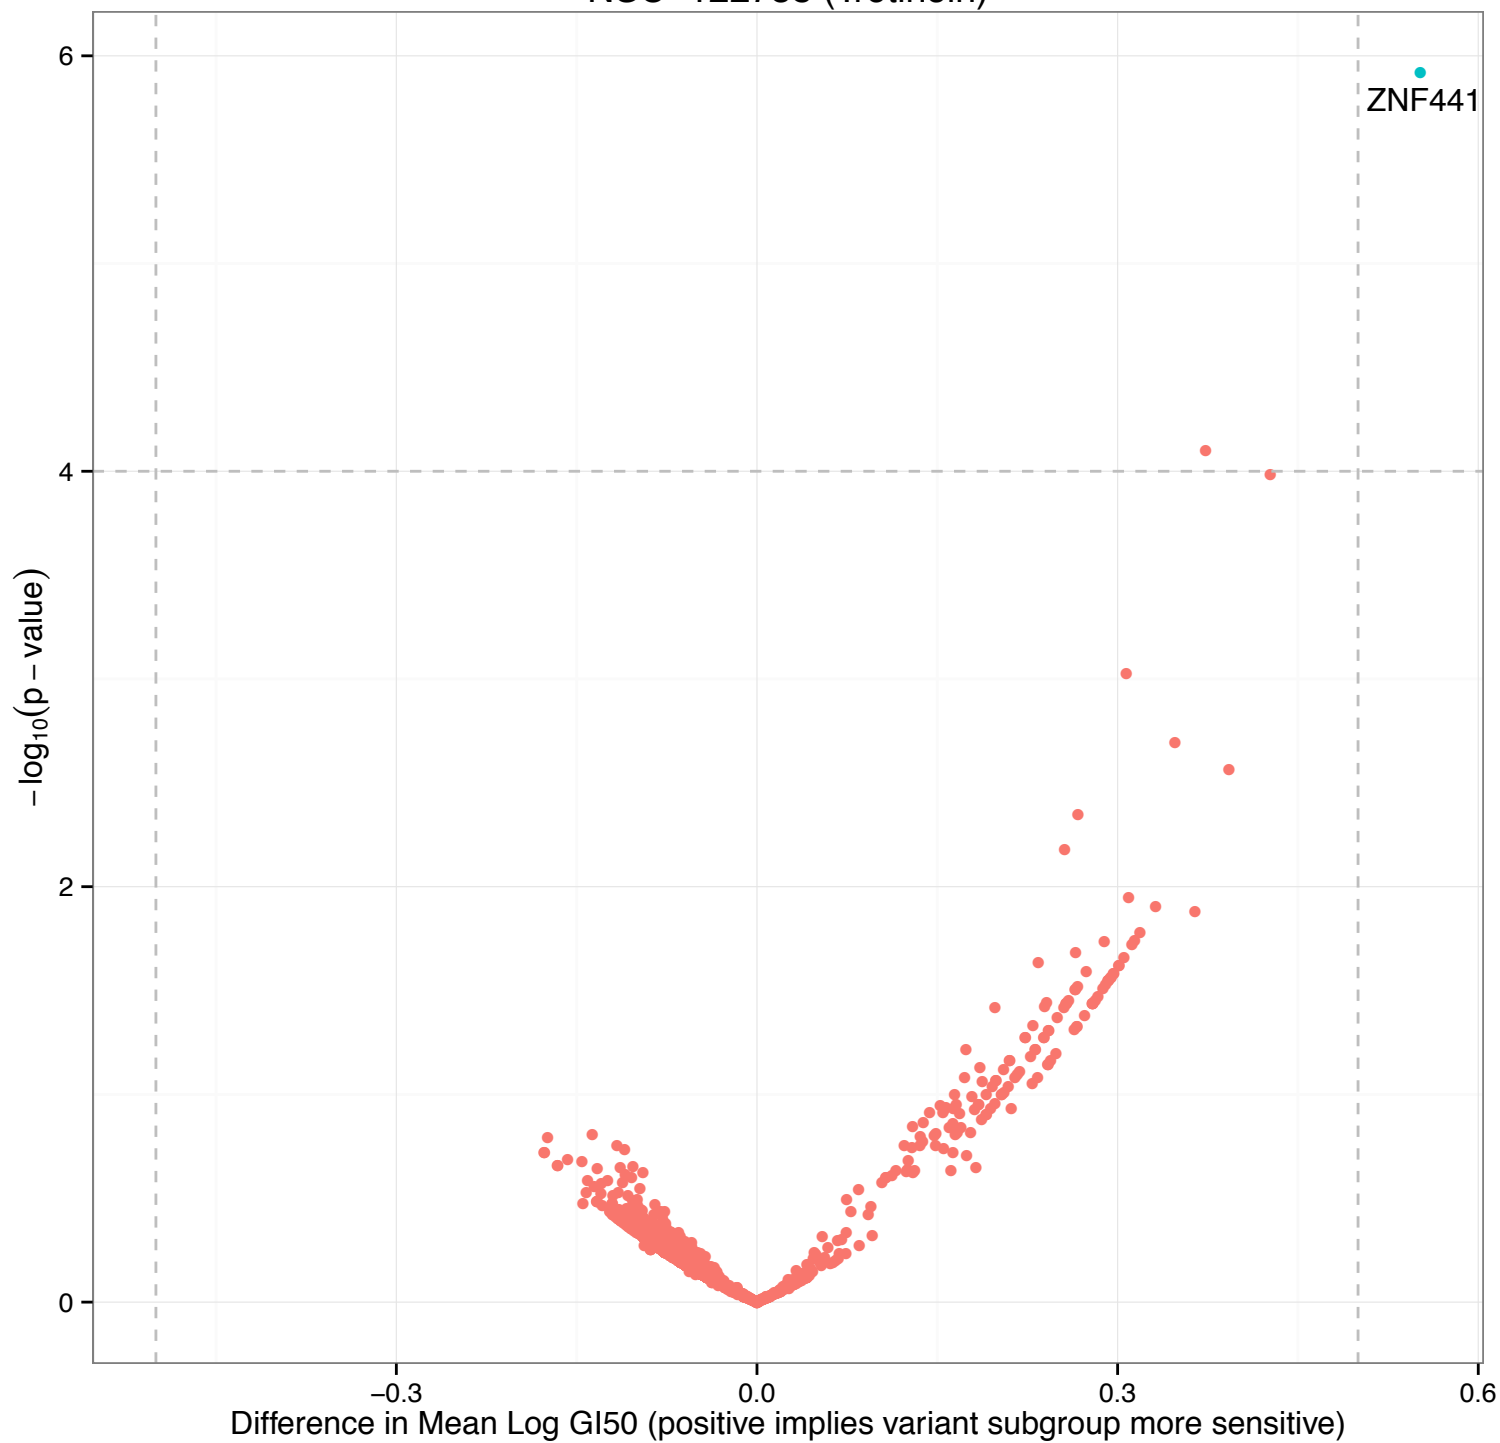

# NSC-123127 (Doxorubicin HCl)

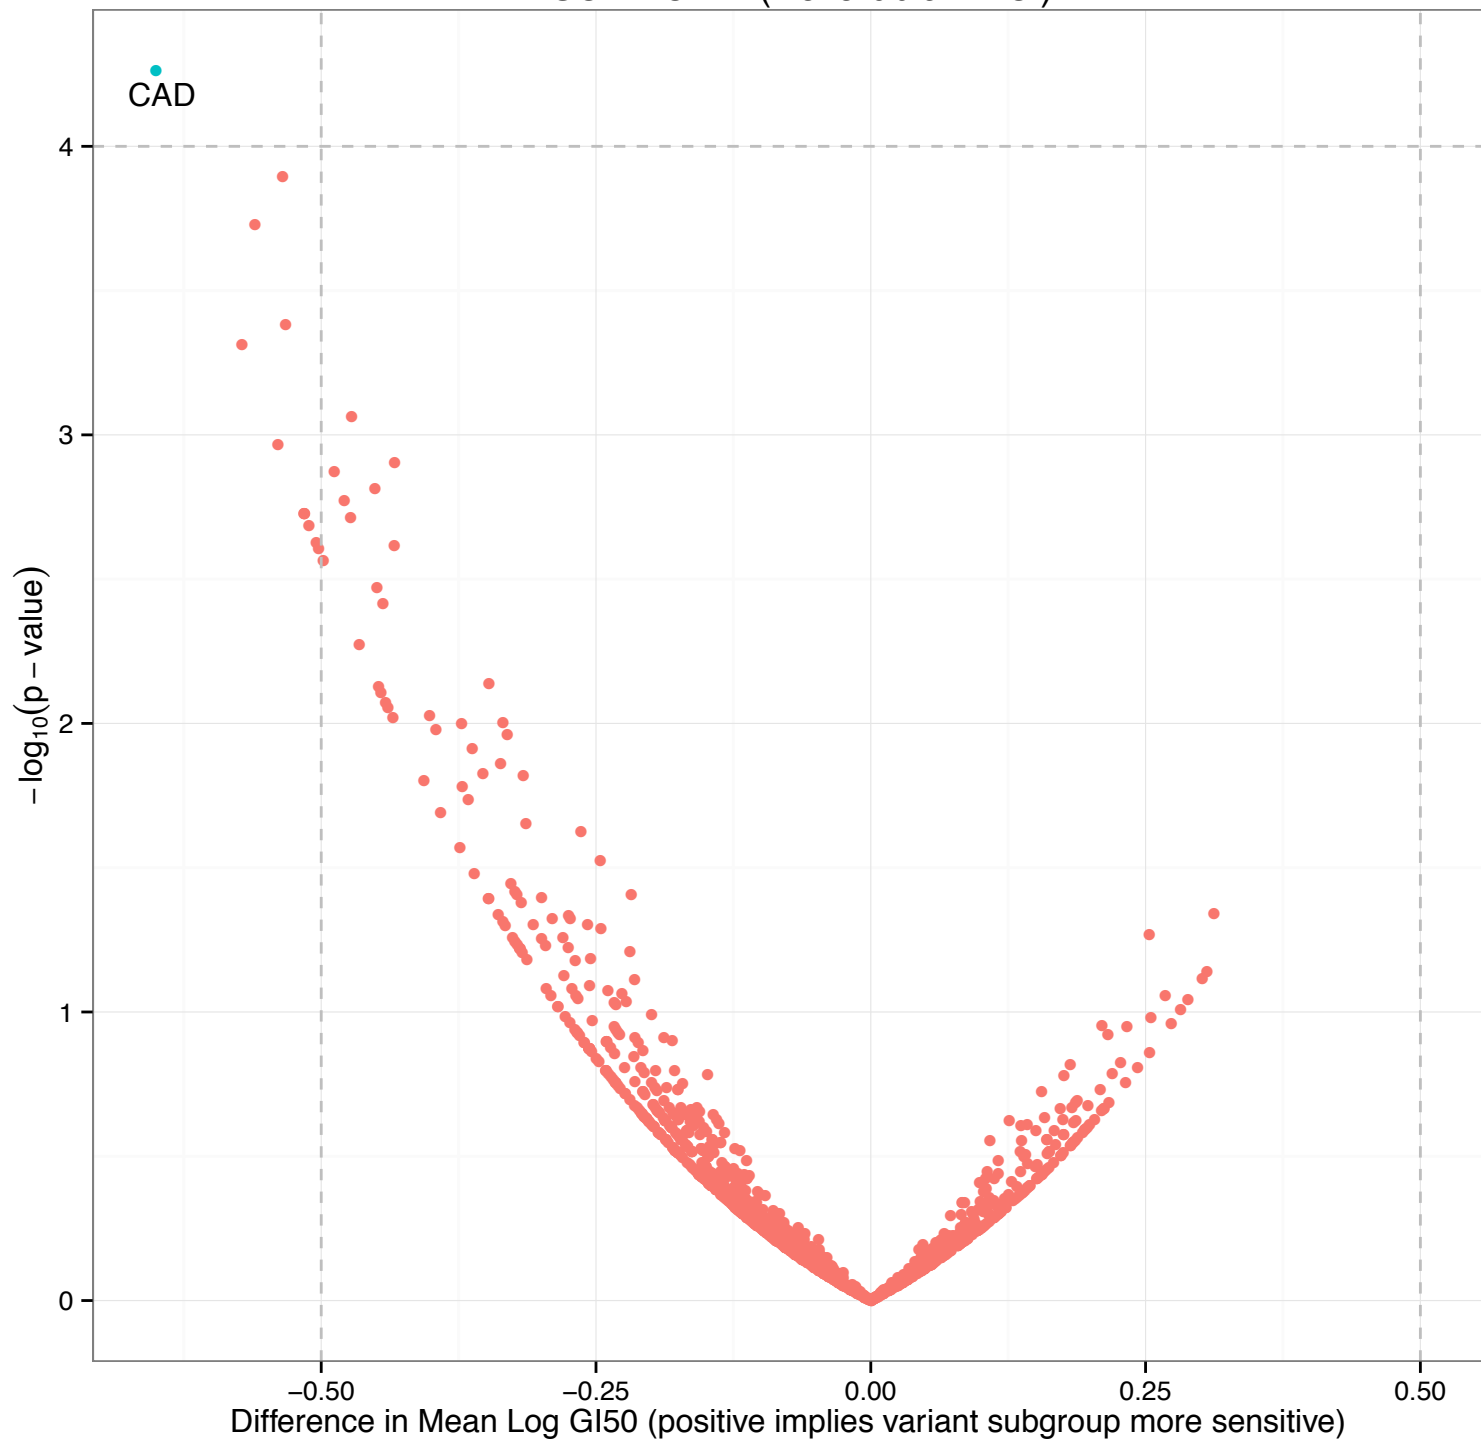

### NSC-127716 (Decitabine)

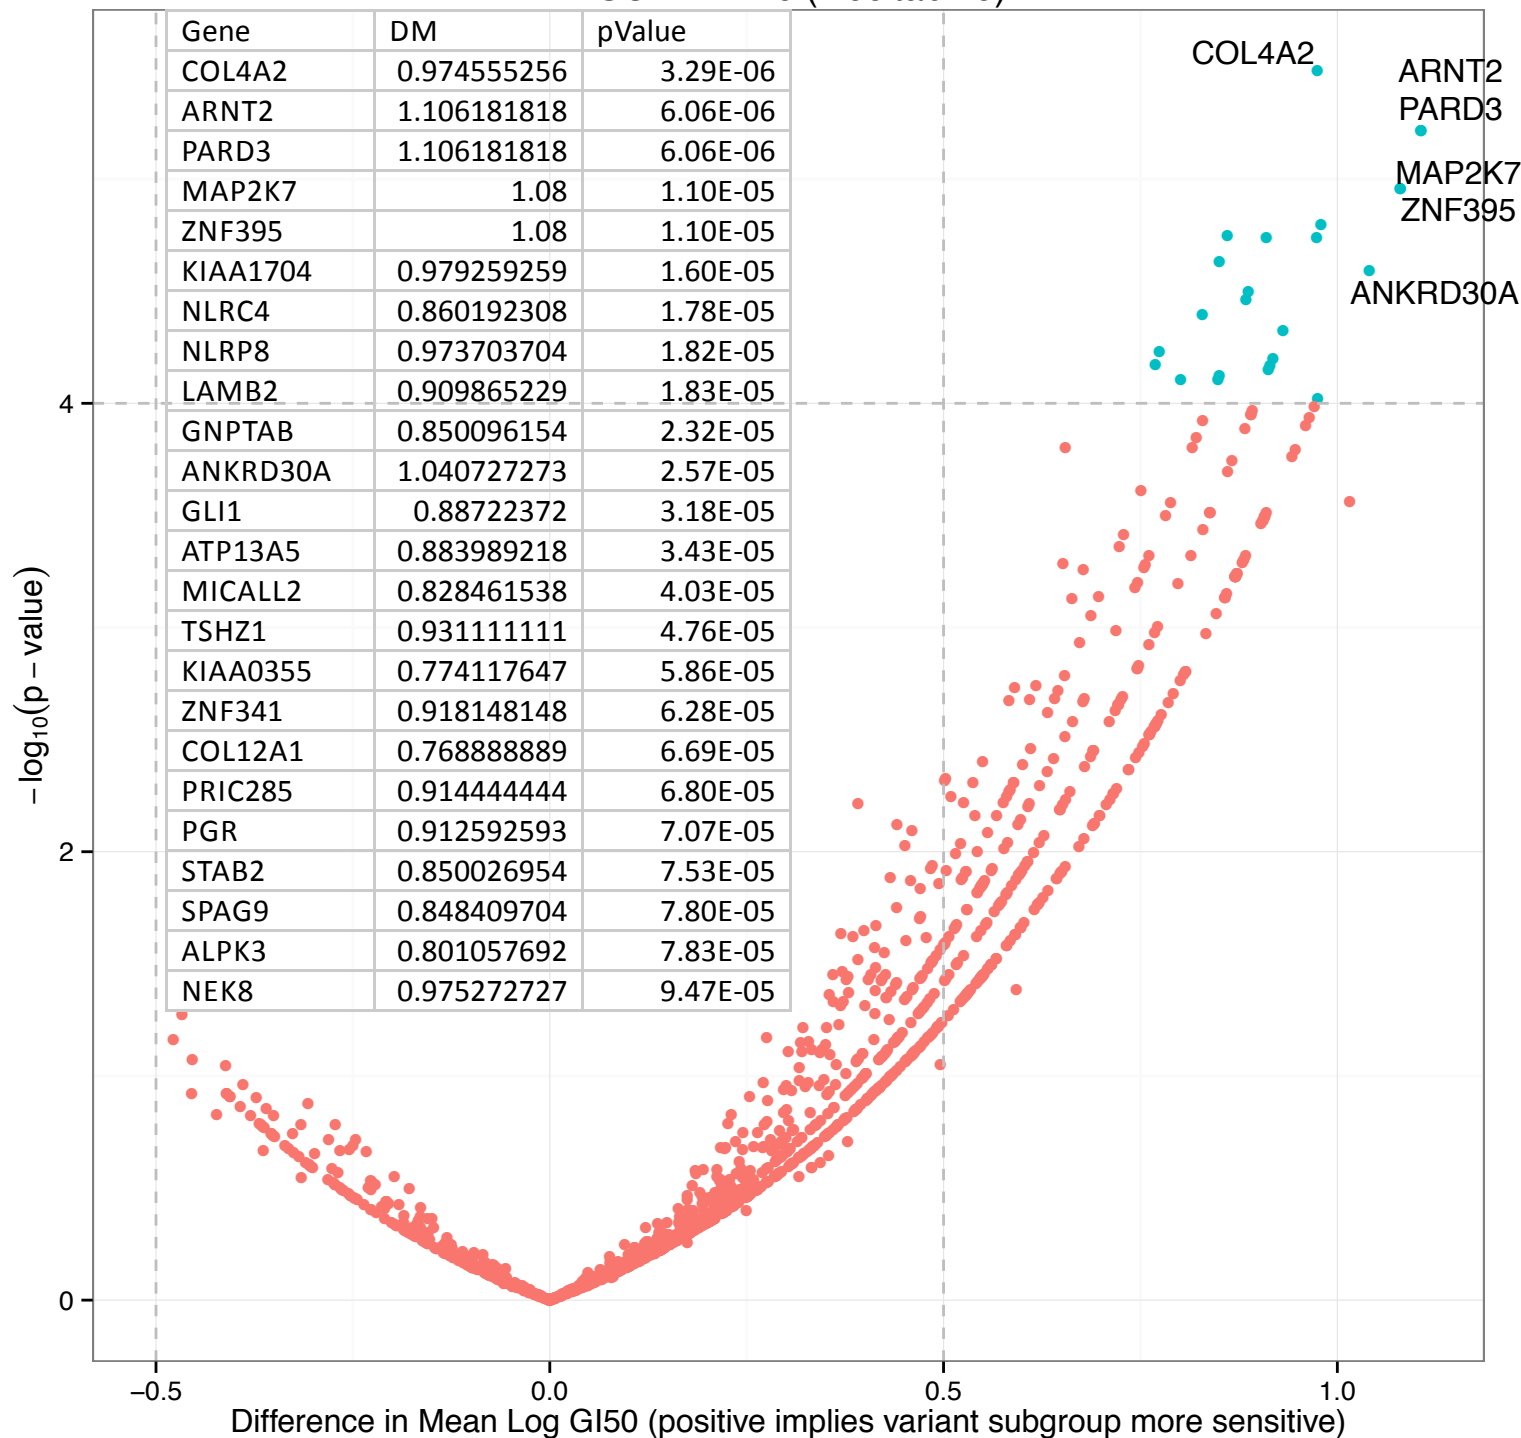

# NSC-24559 (MitrAMYCIN)

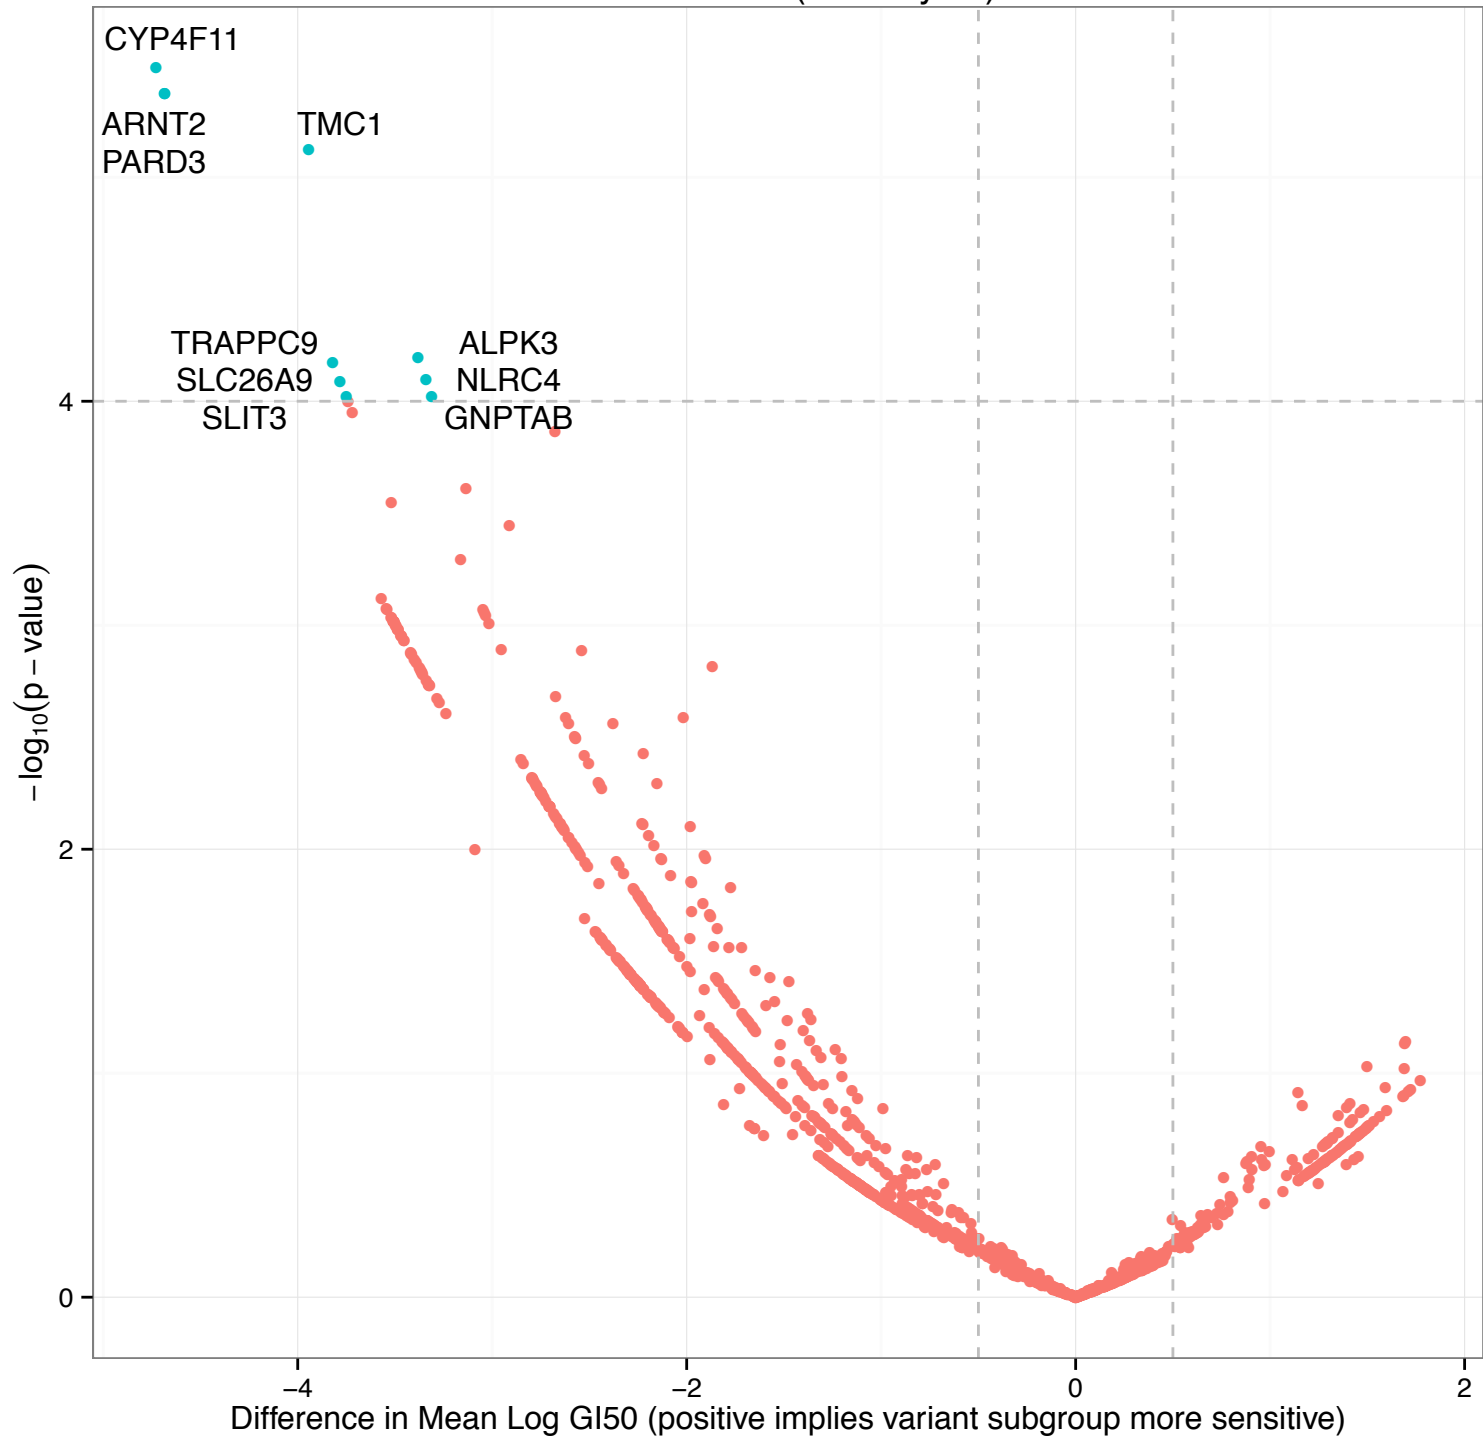

# NSC-36405 (Chelerythrine)

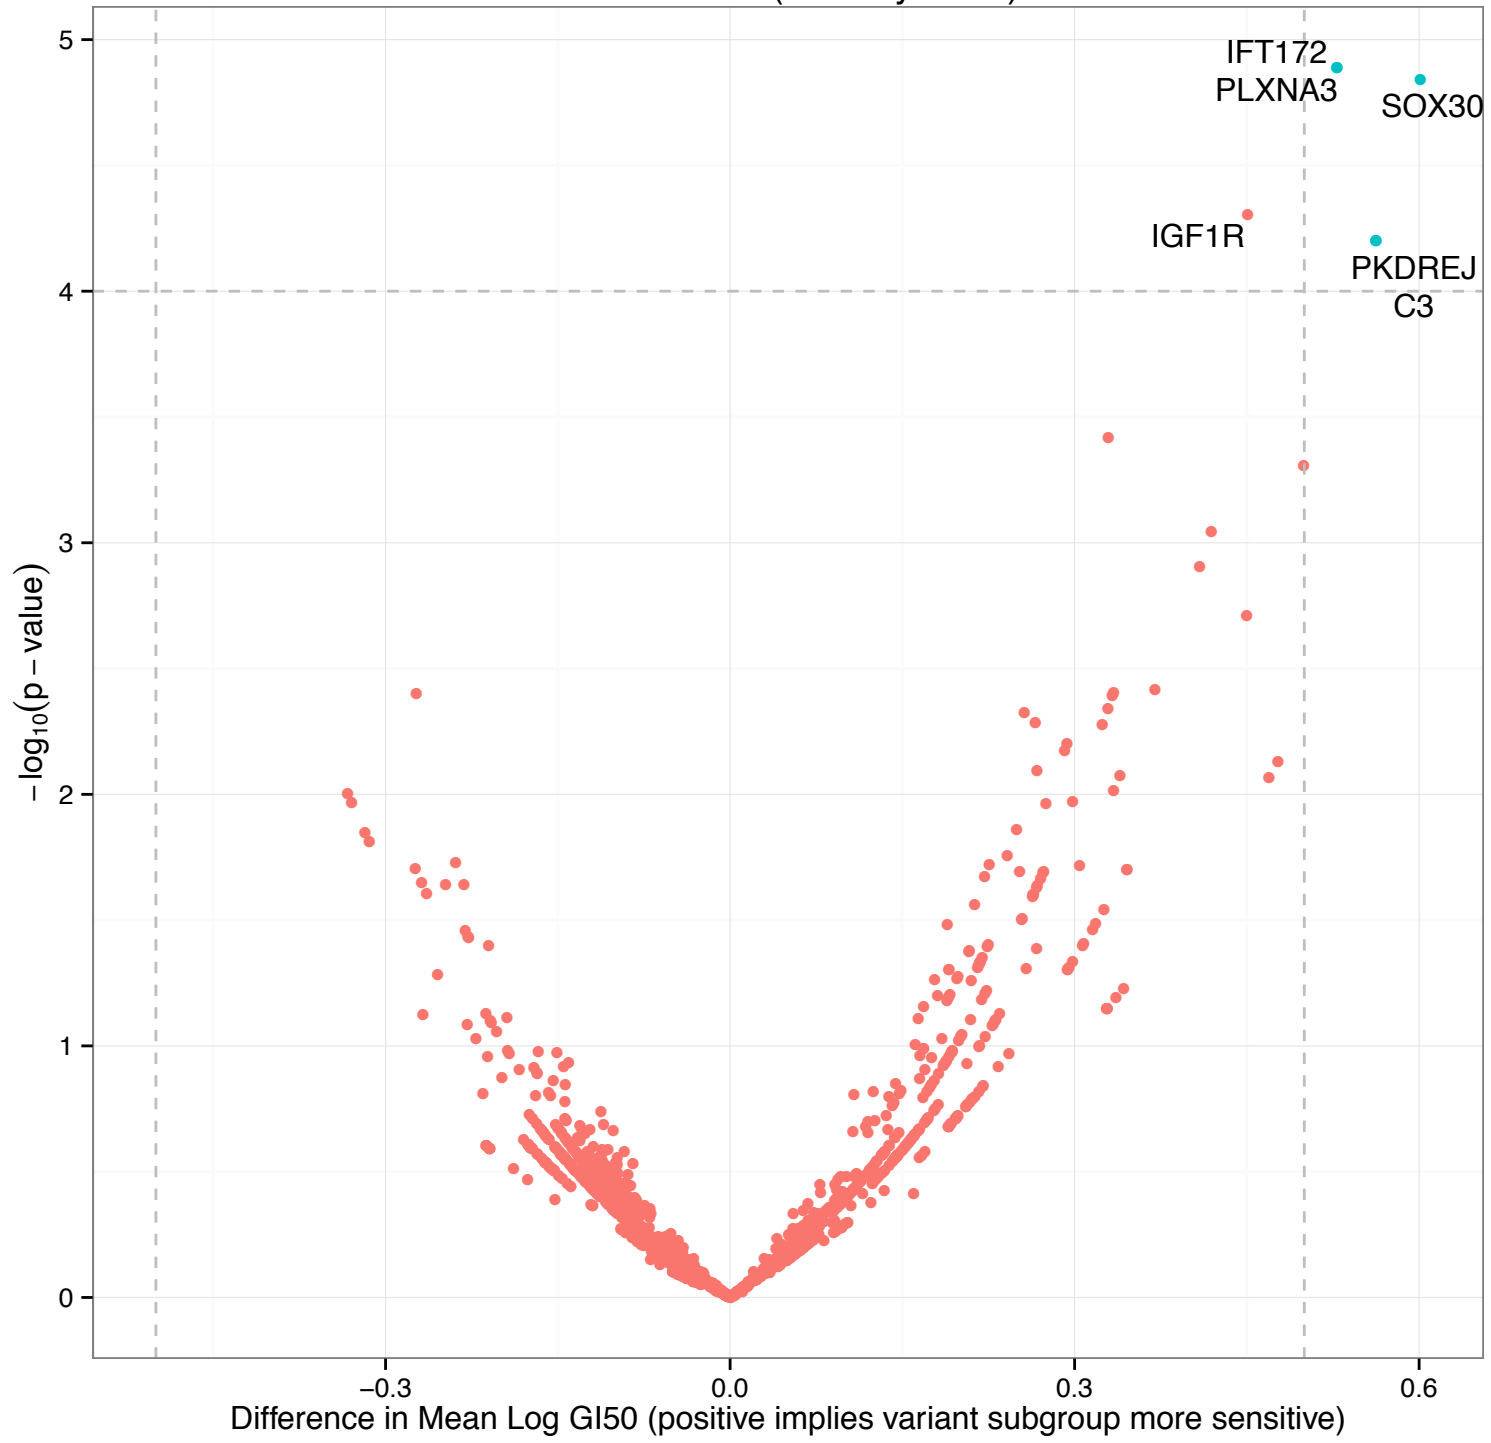

# NSC-609699 (Topotecan HCl)

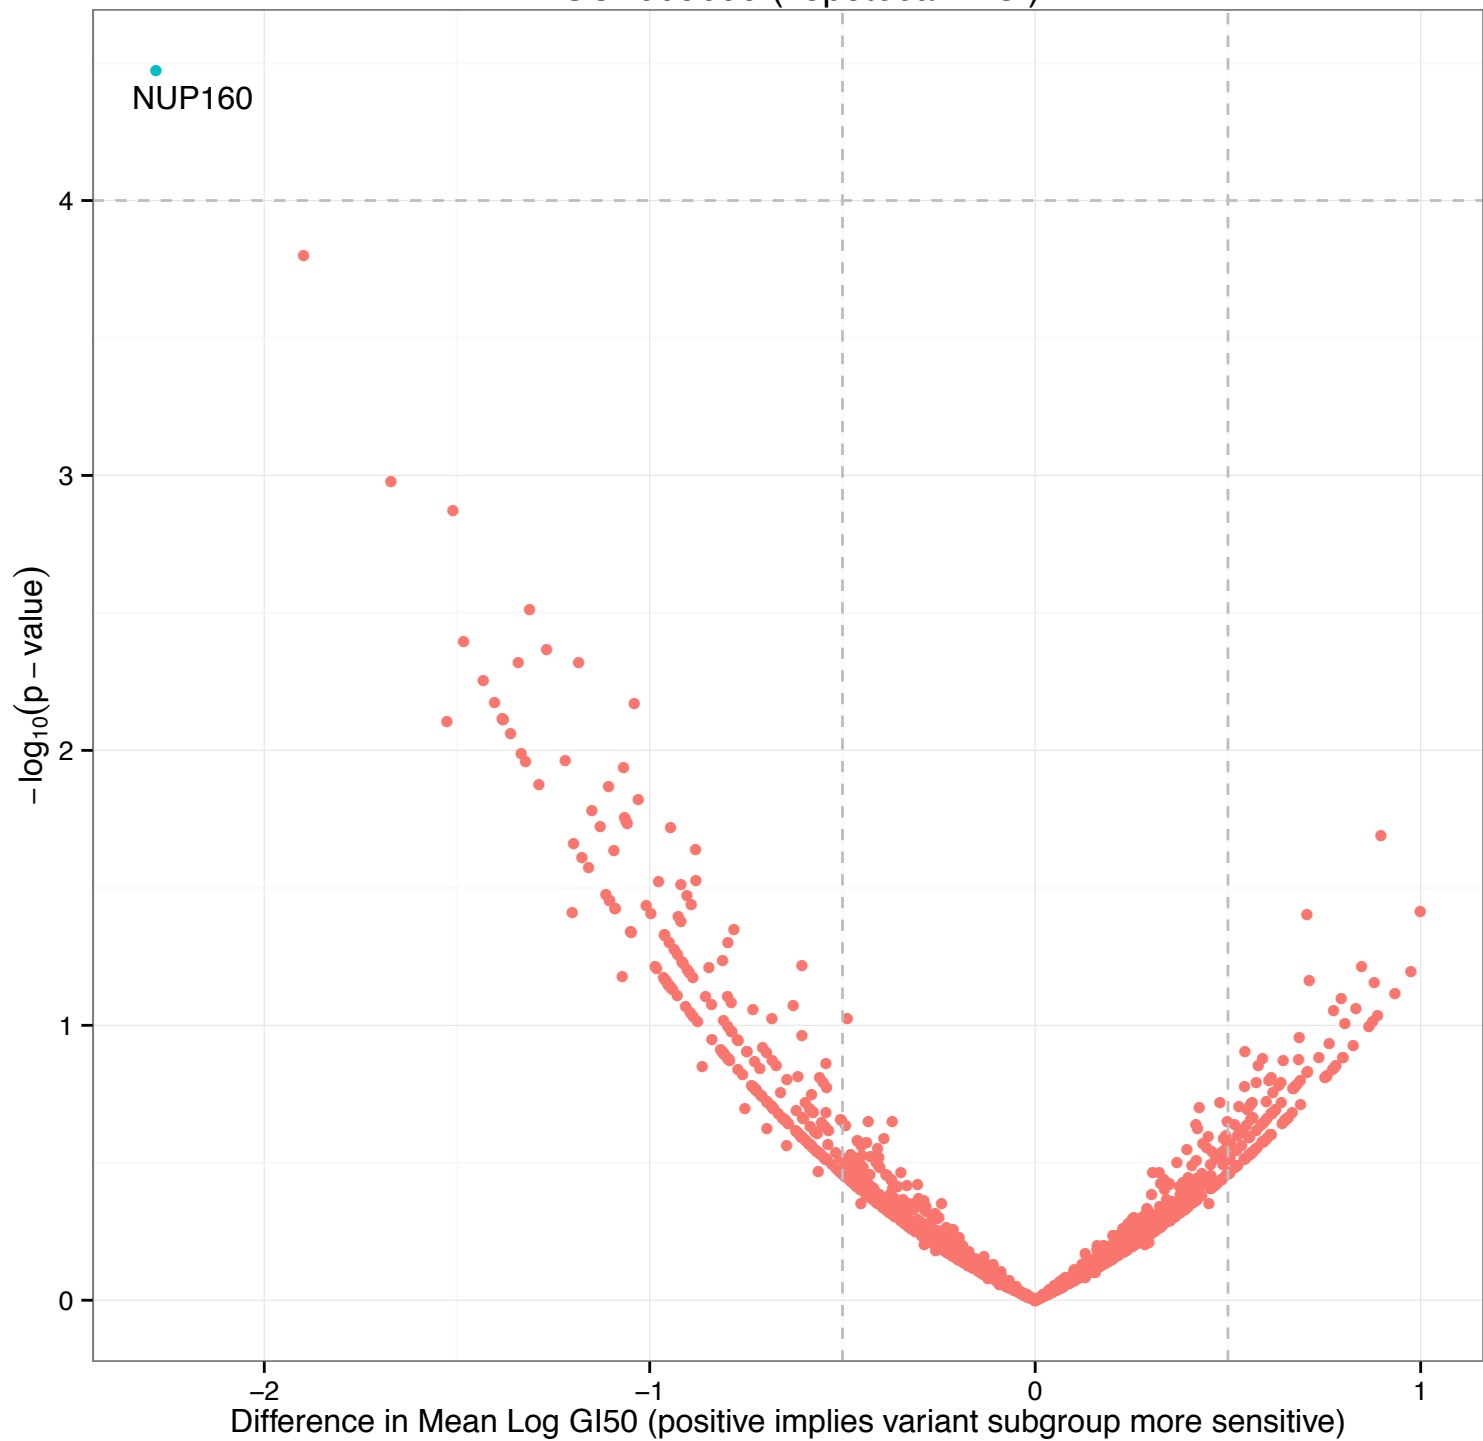

# NSC-639966 (Perifosine)

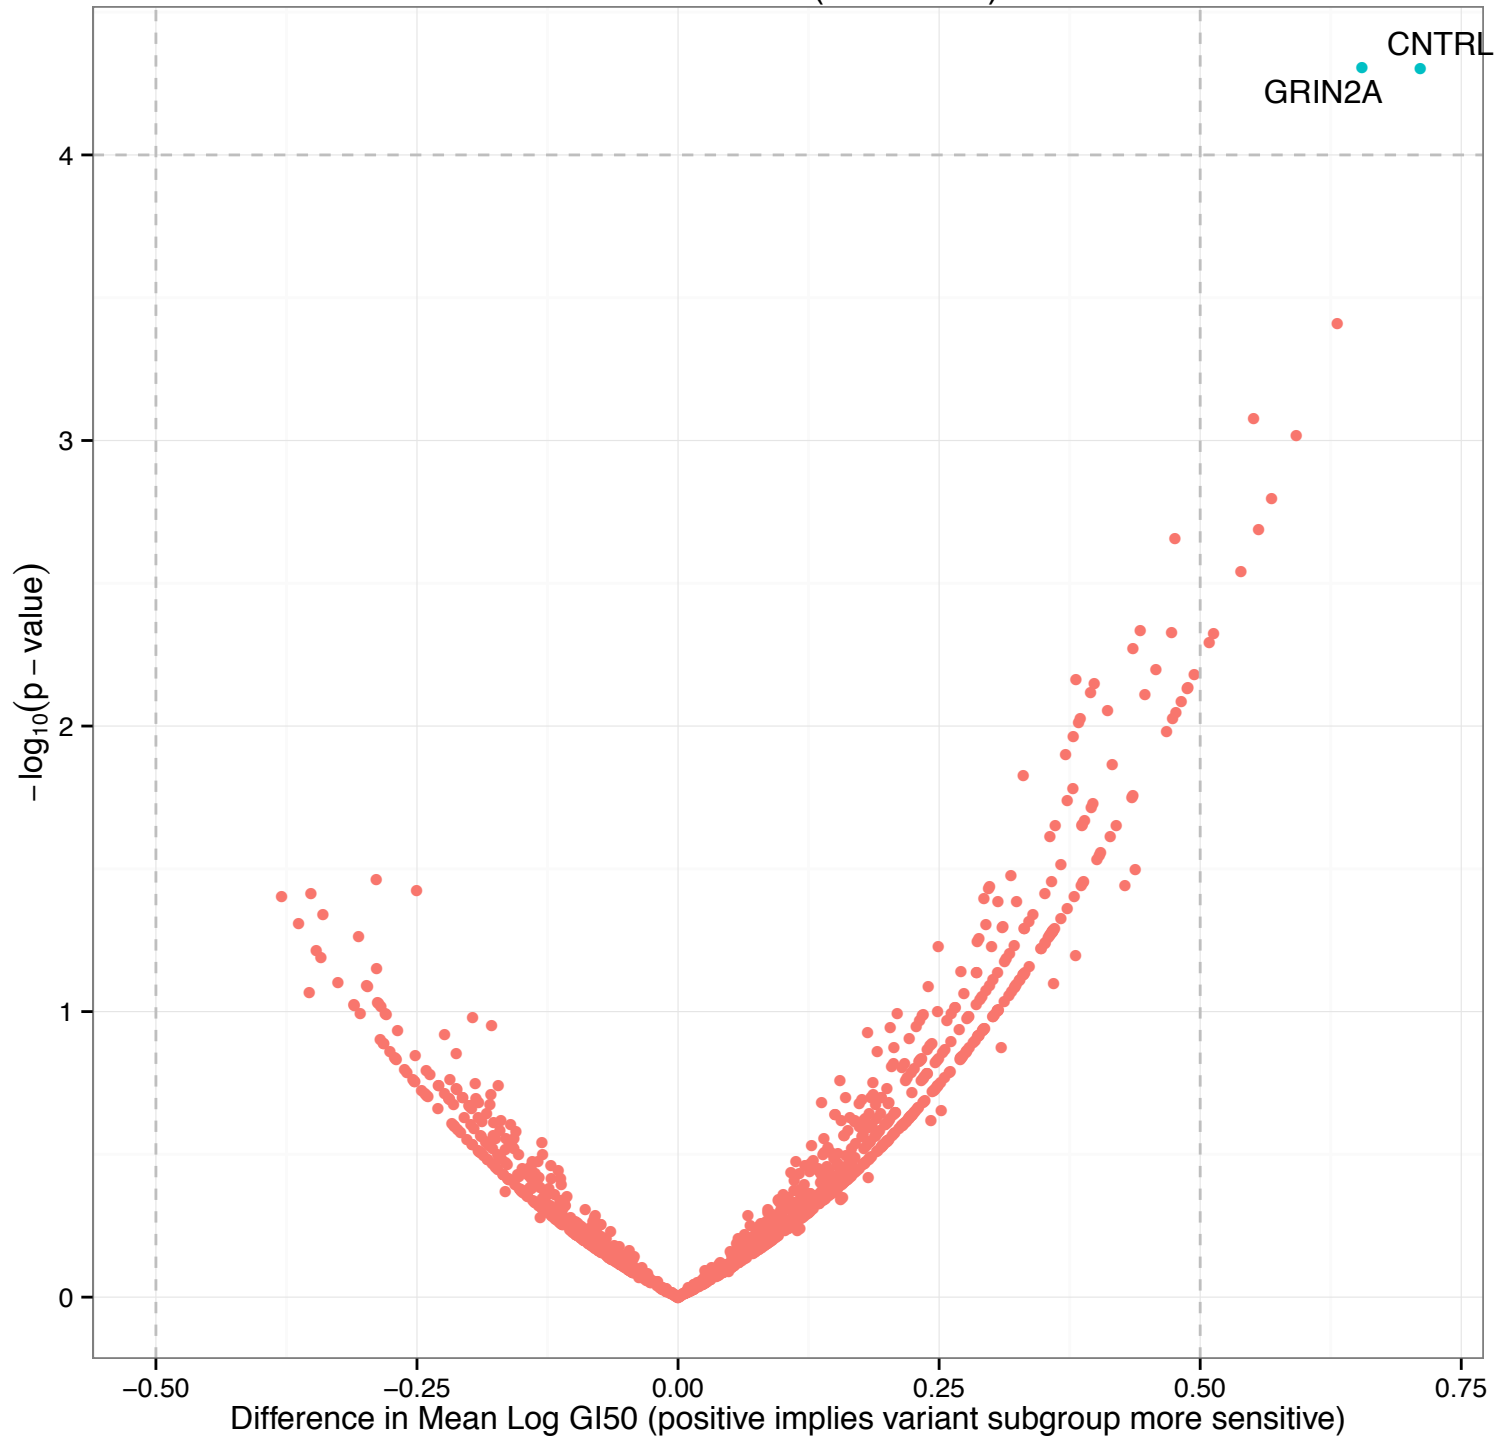

# NSC-683863 (Irofulven (MGI-114))

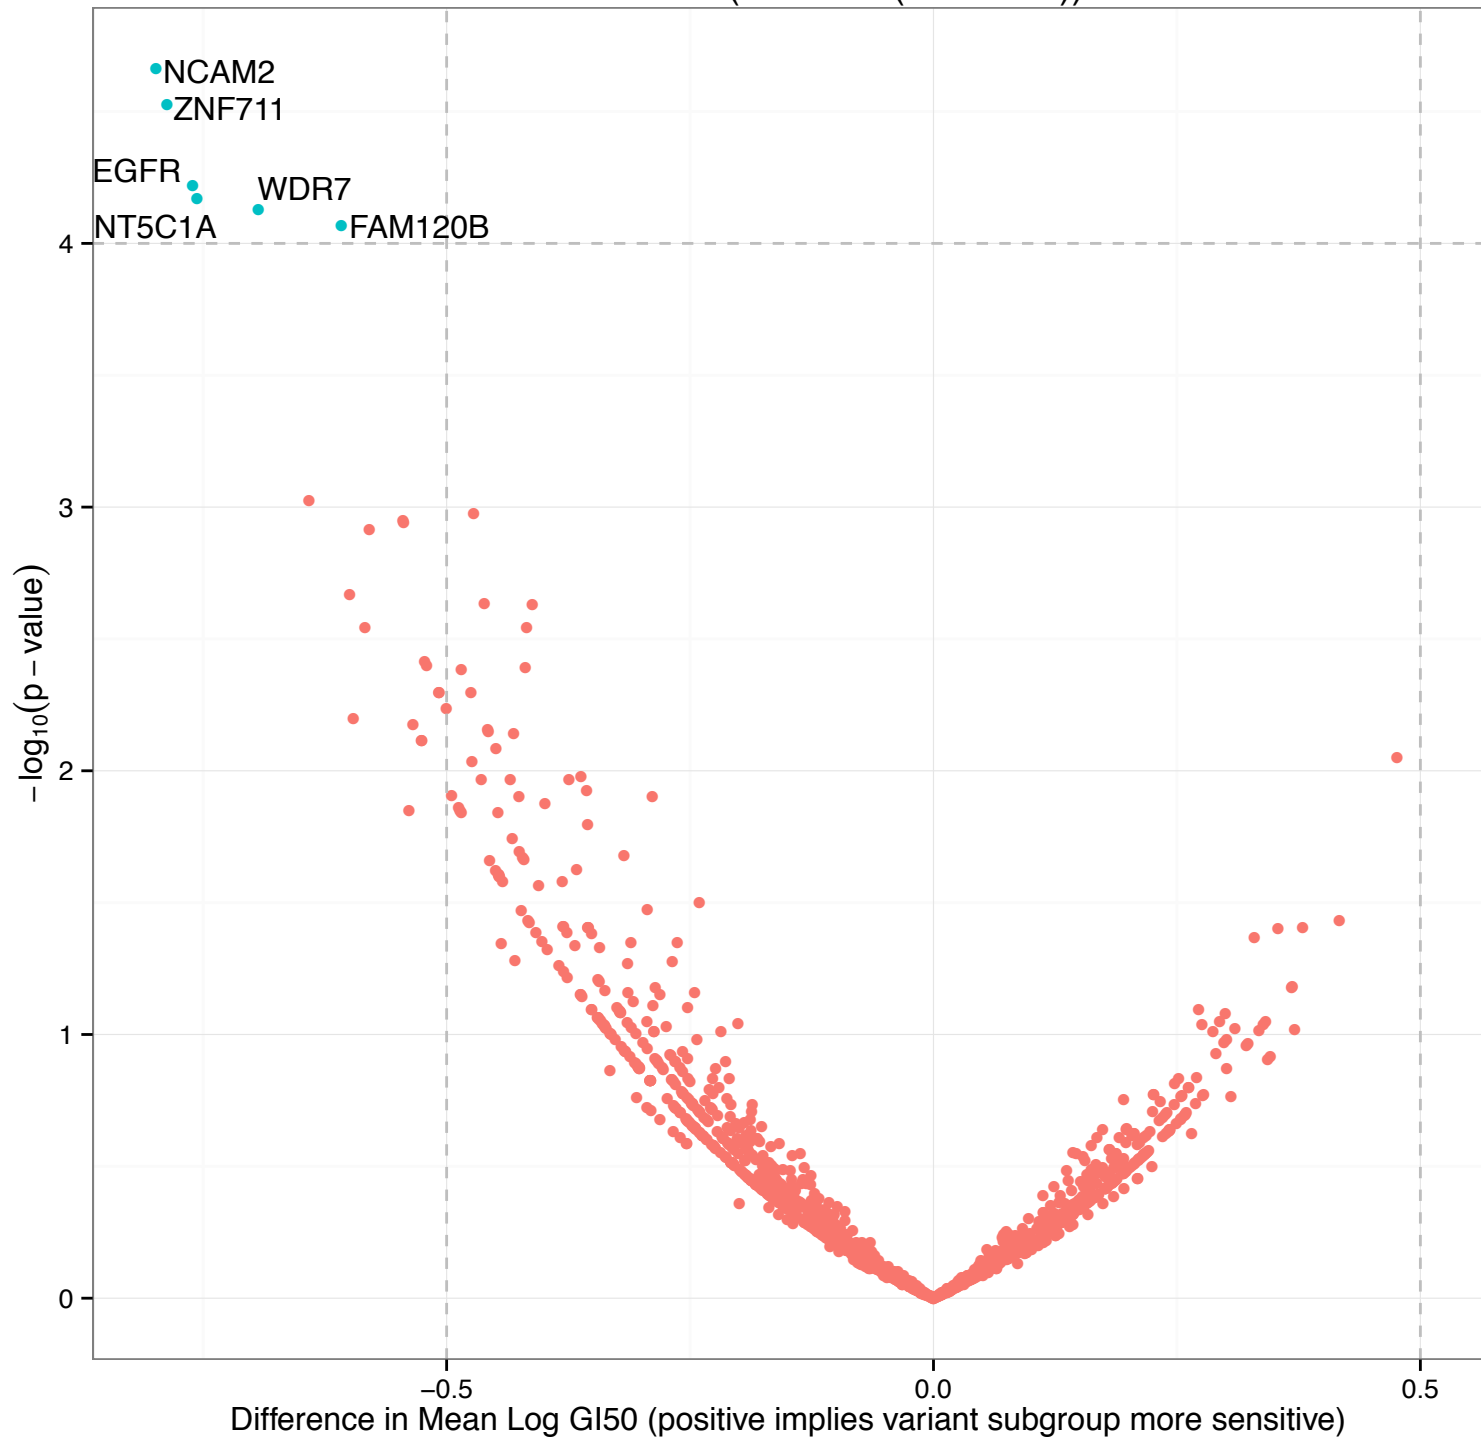



# NSC-686673 (Nelarabine)

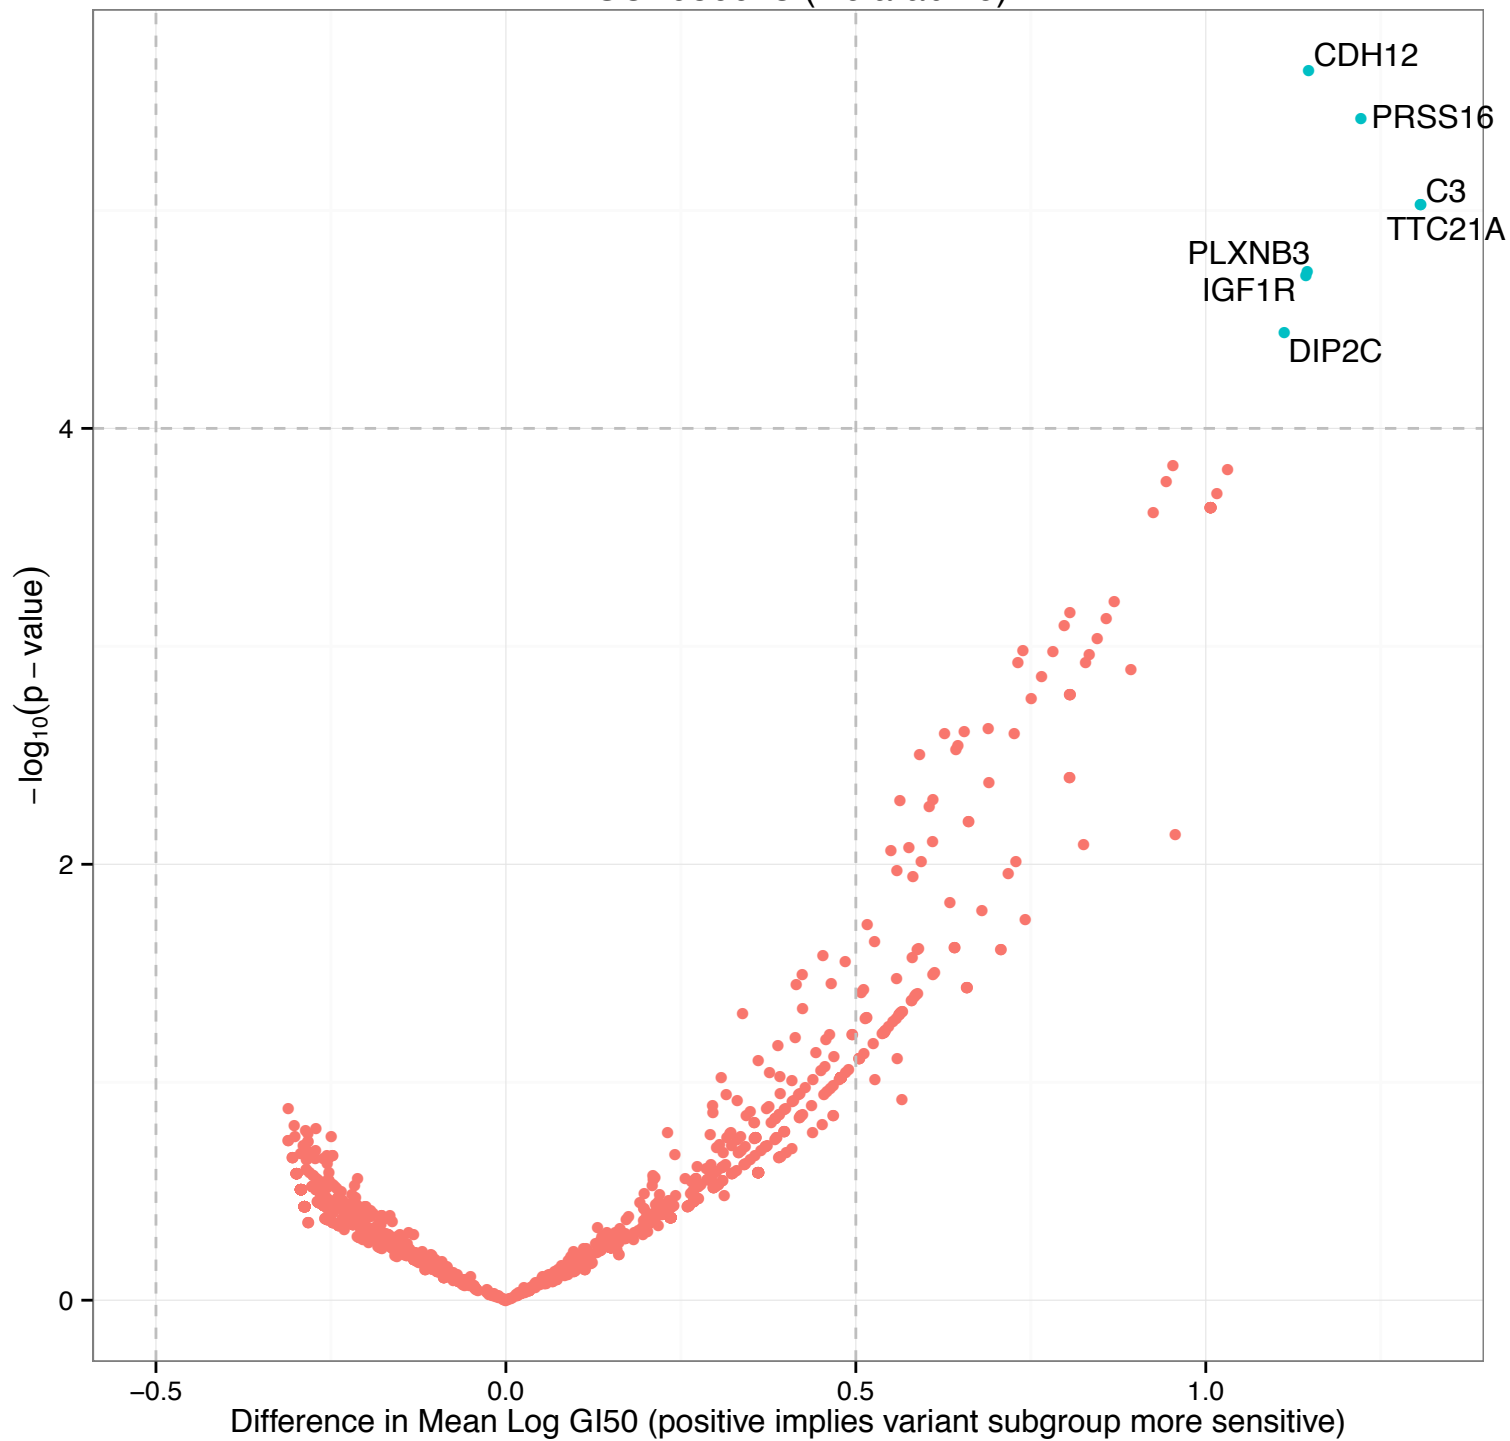

# NSC-697979 (Denileukin diftitox)

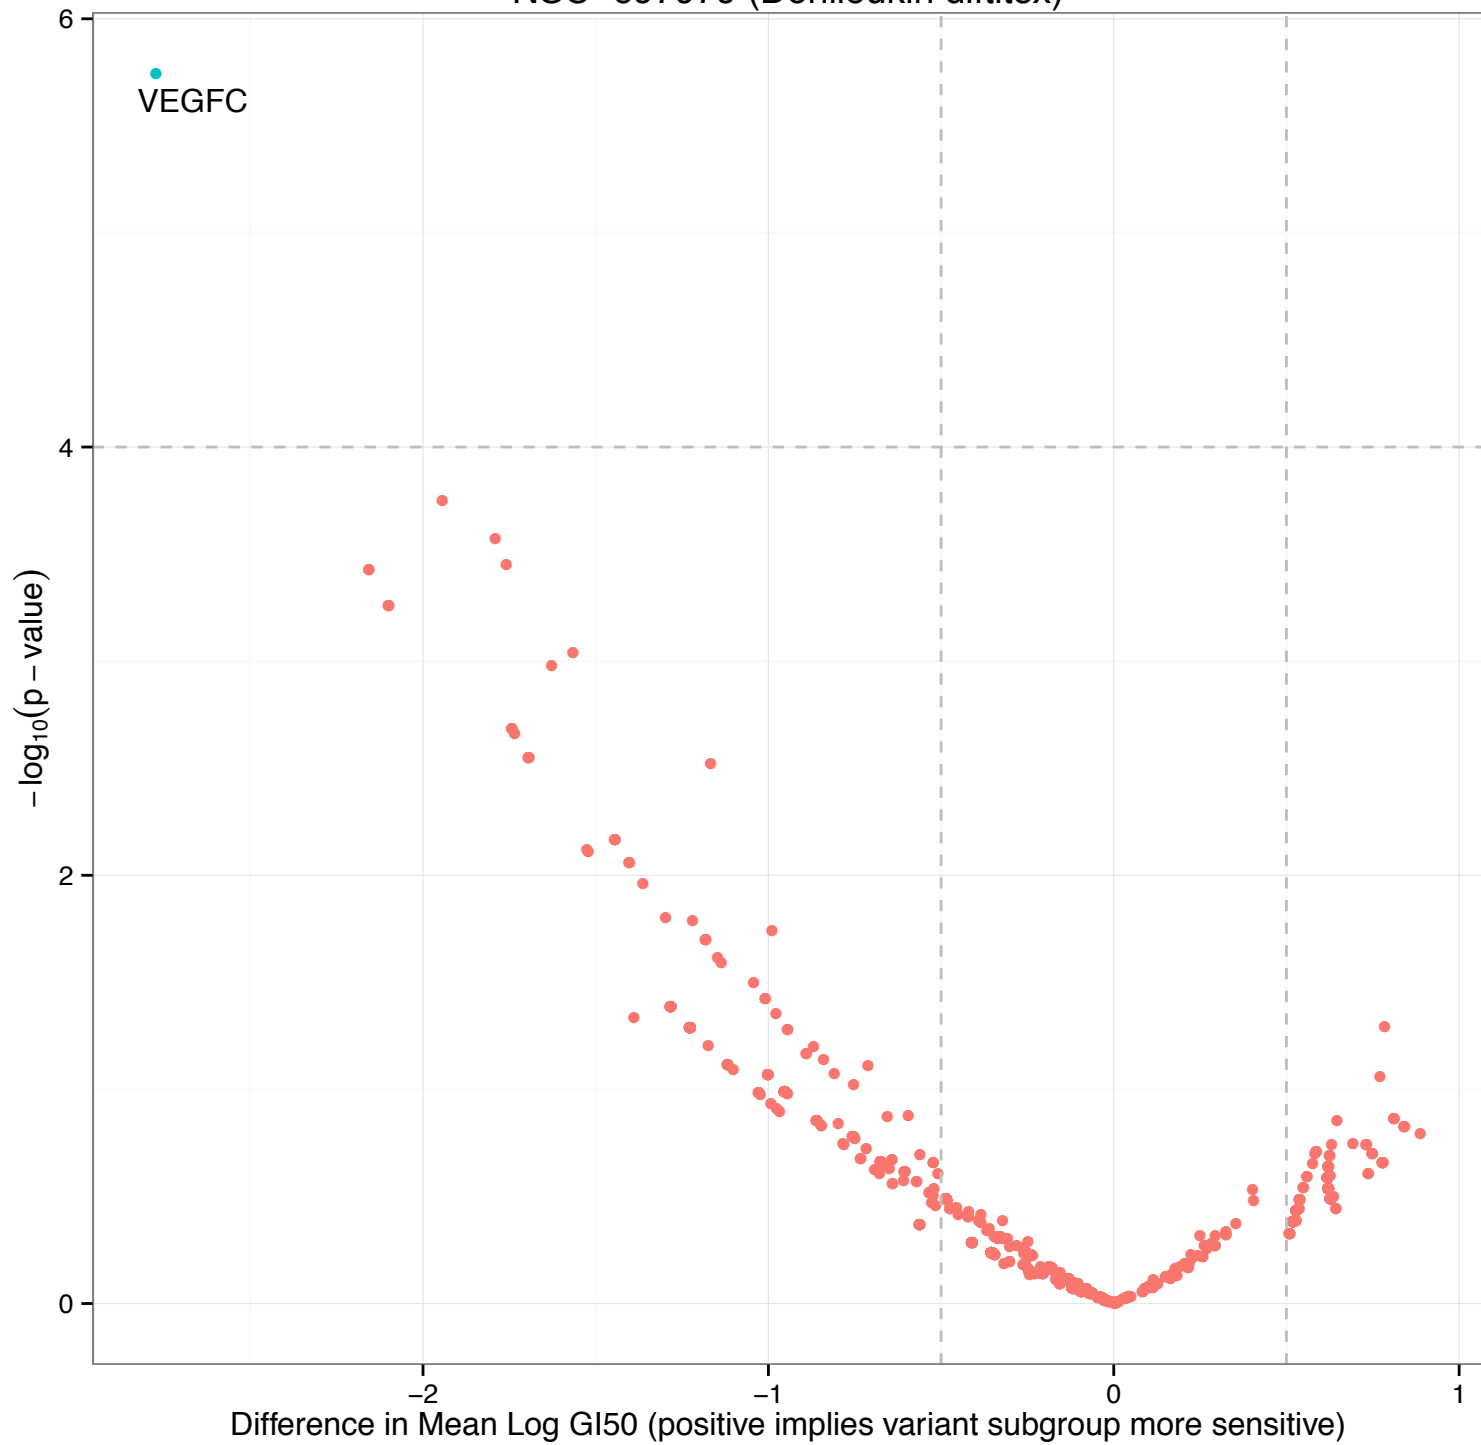

# NSC-698037 (Pemetrexed)

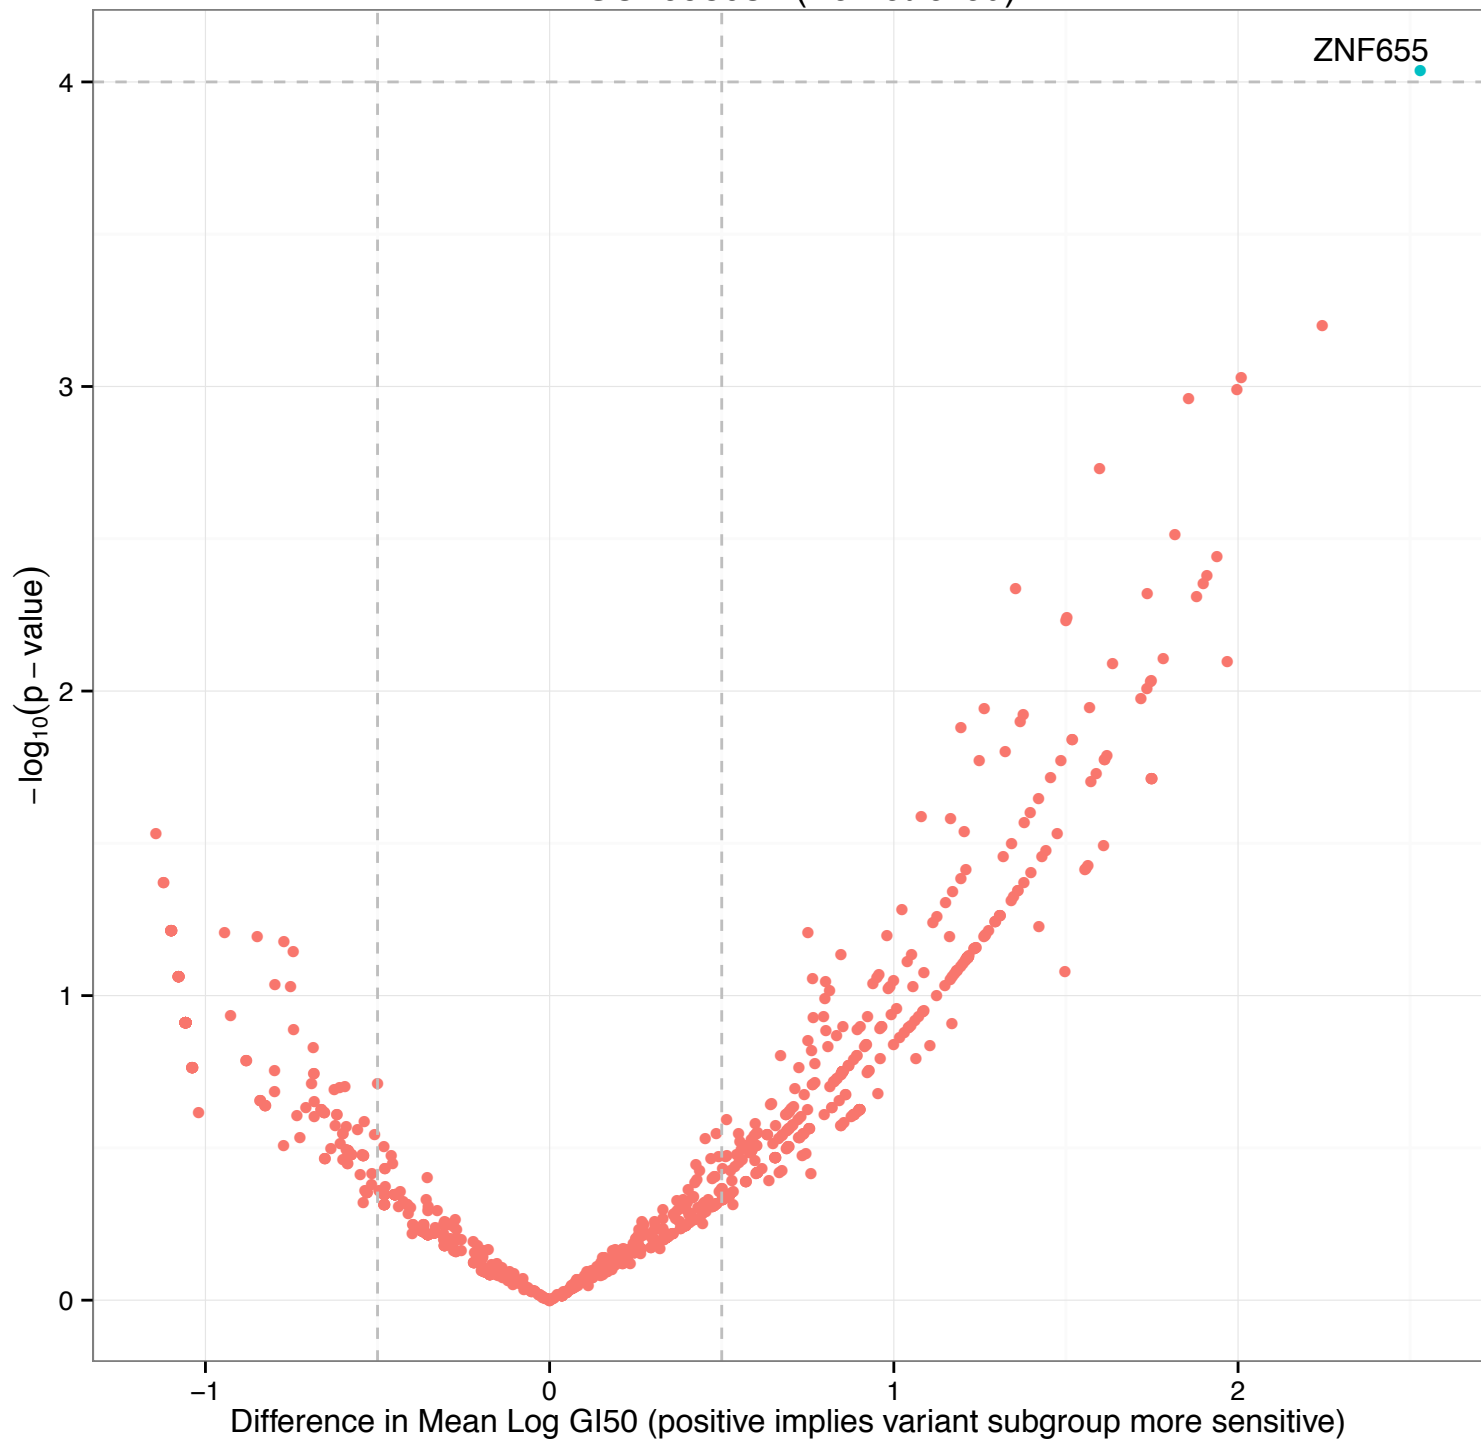

# NSC-698215 (XK-469R)

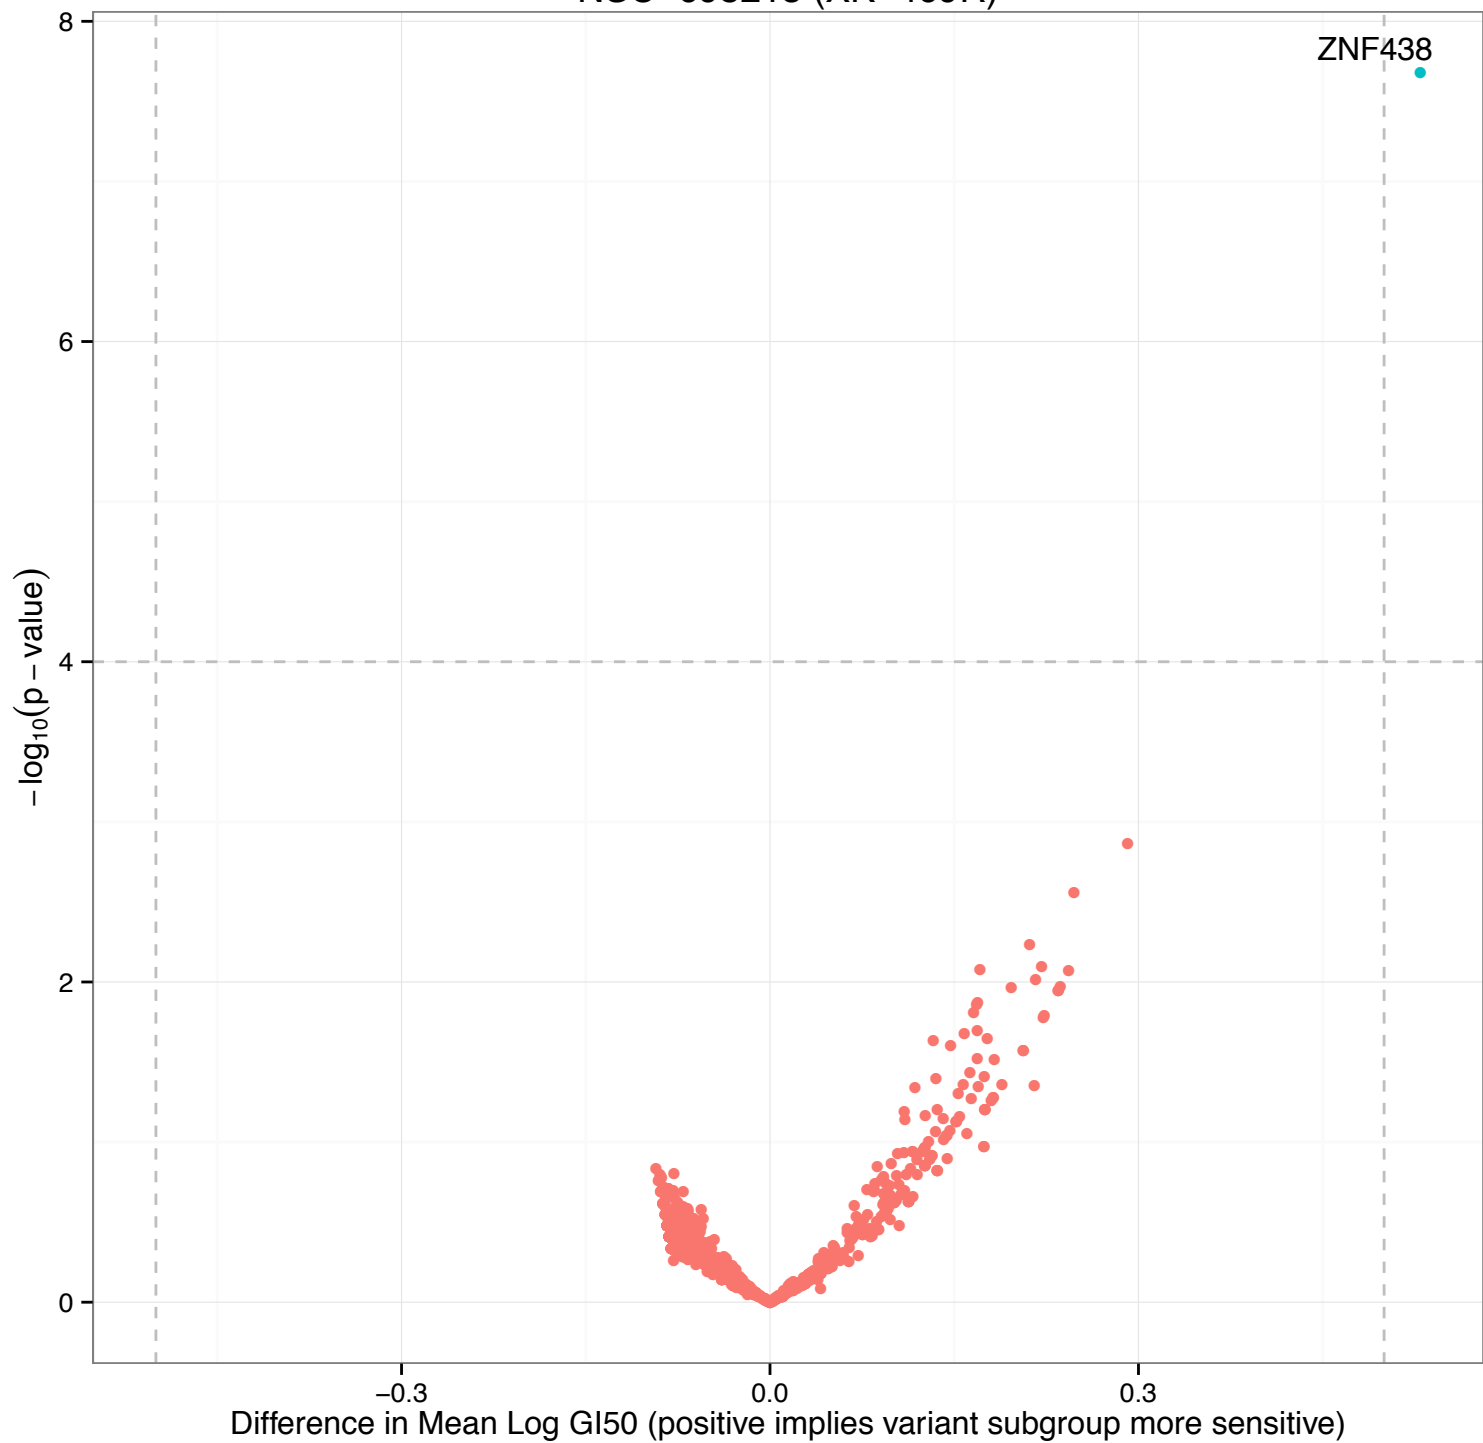

# NSC-713563 (Exemestane)

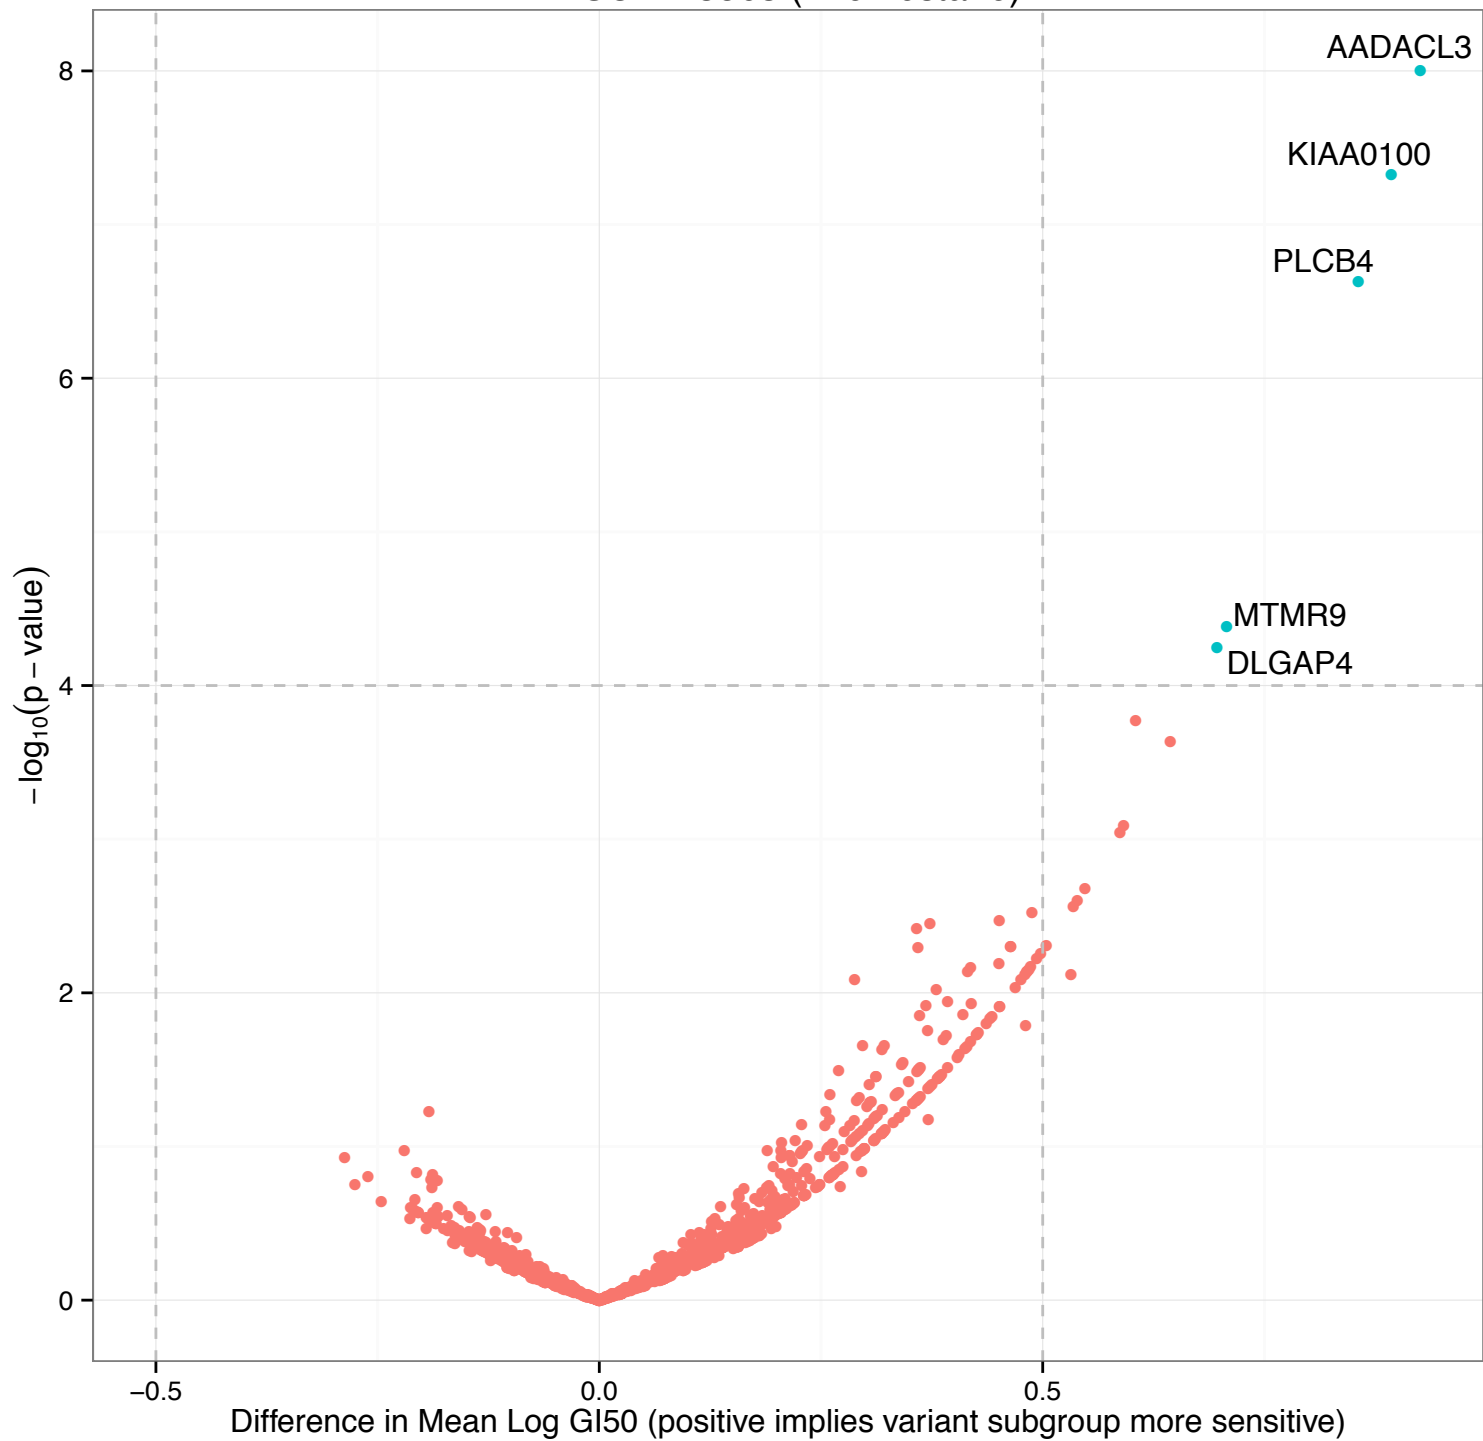

# NSC-719276 (Fulvestrant)

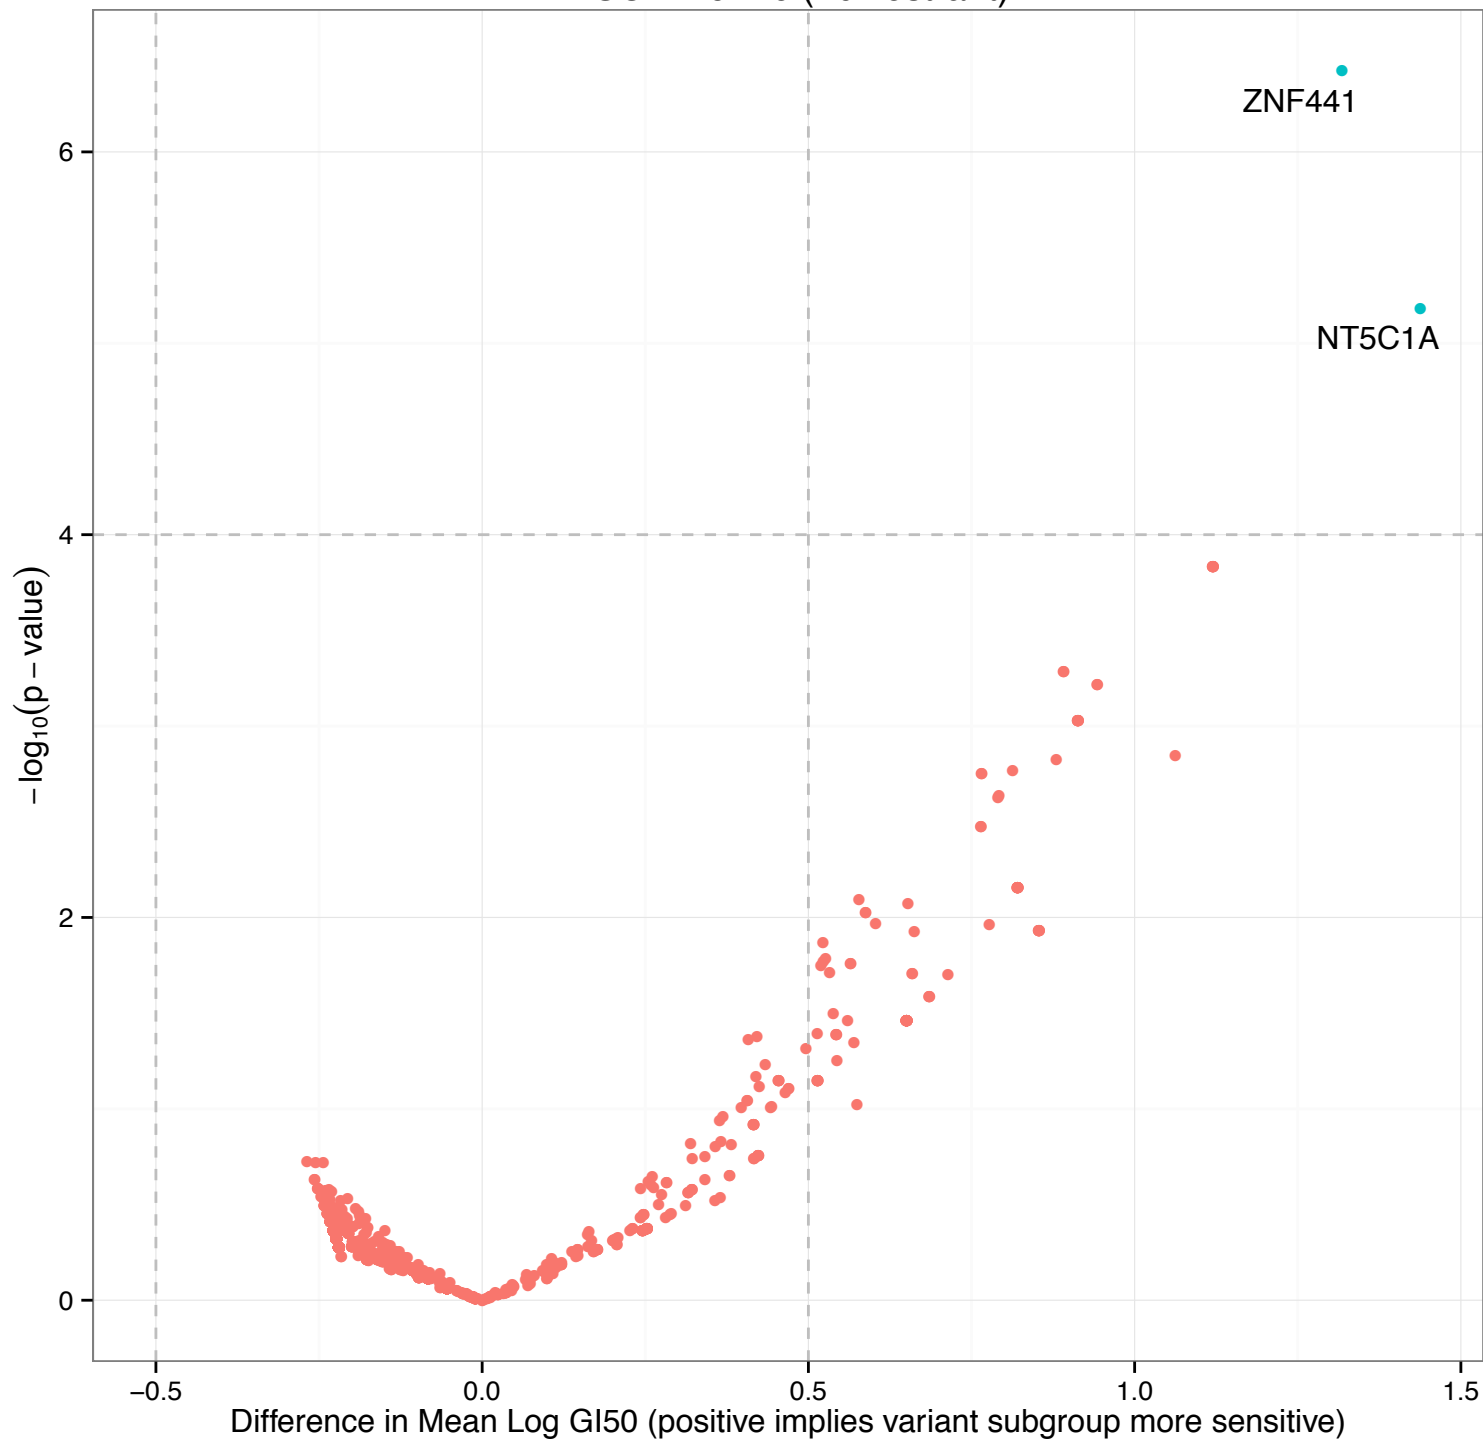

# NSC-733504 (Everolimus)

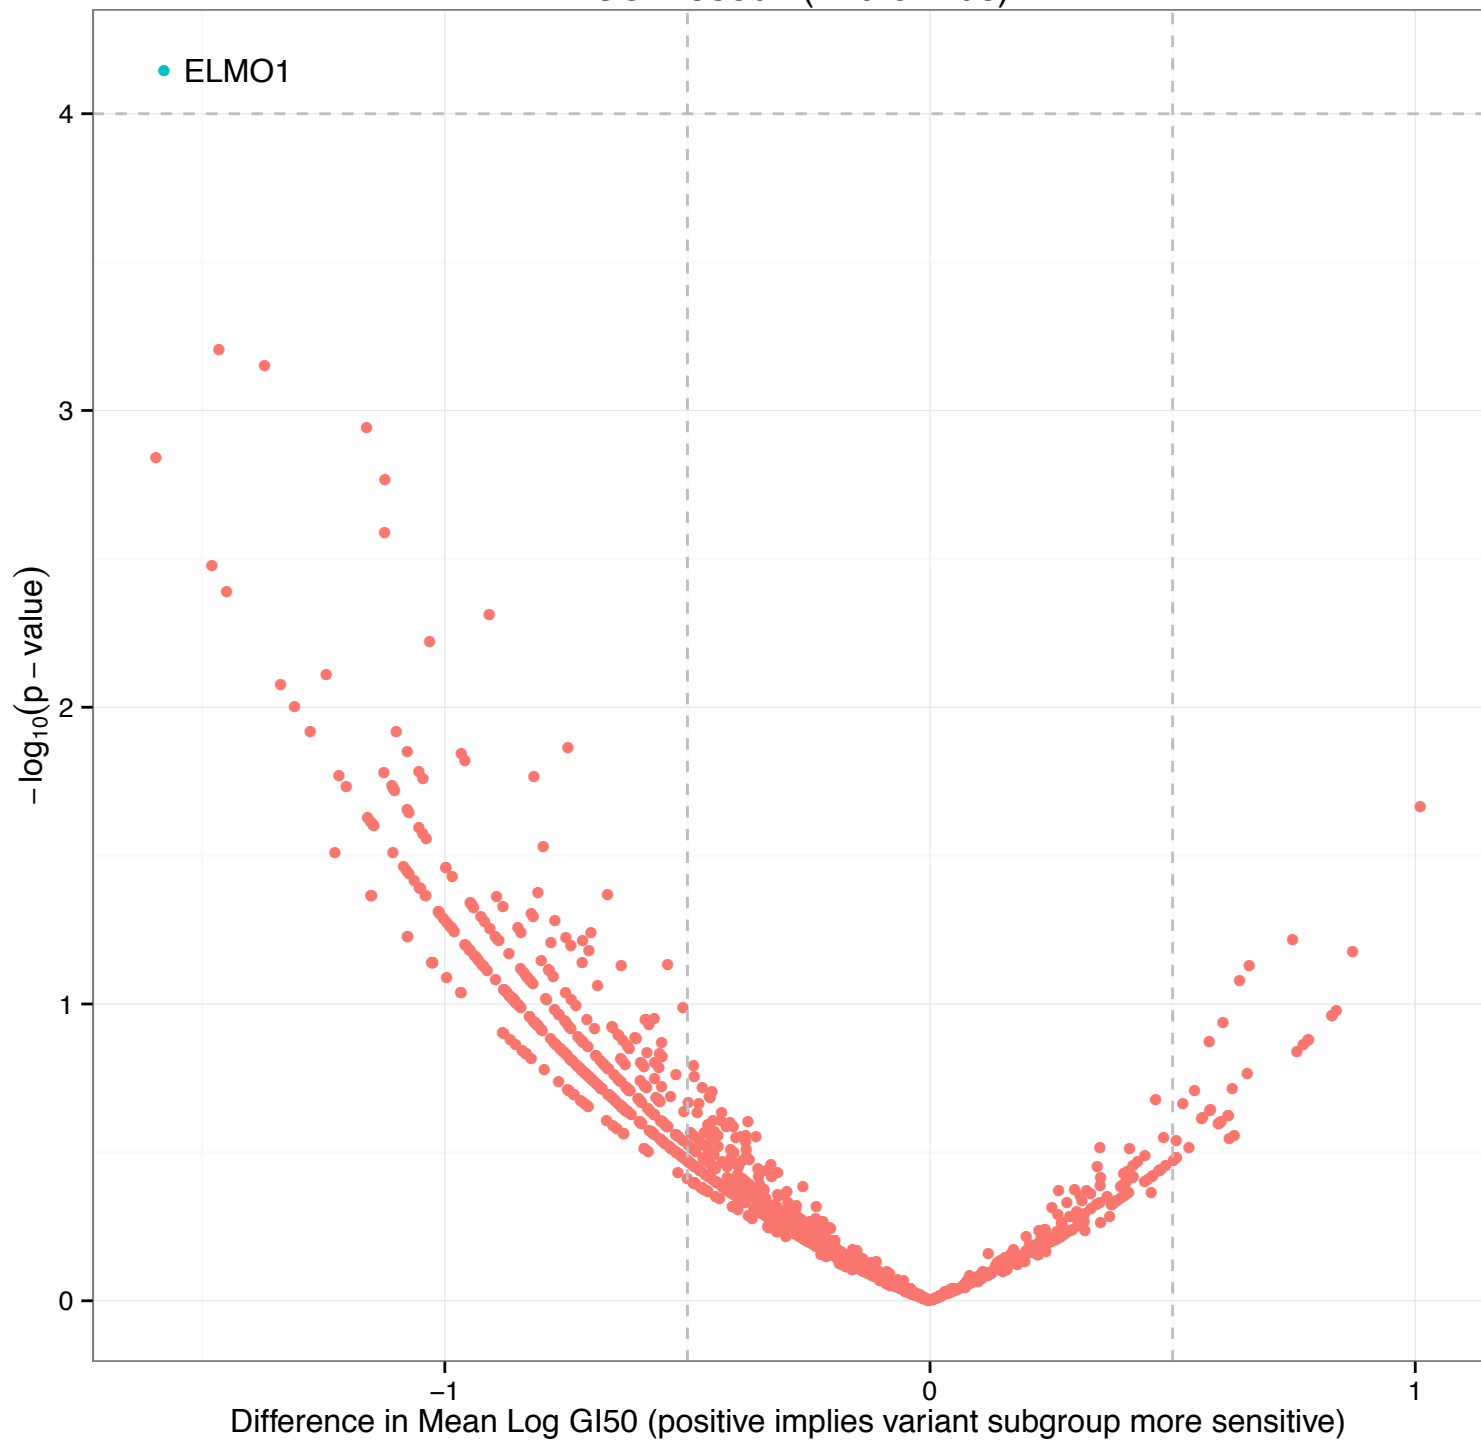

# NSC-743414 (Imatinib)

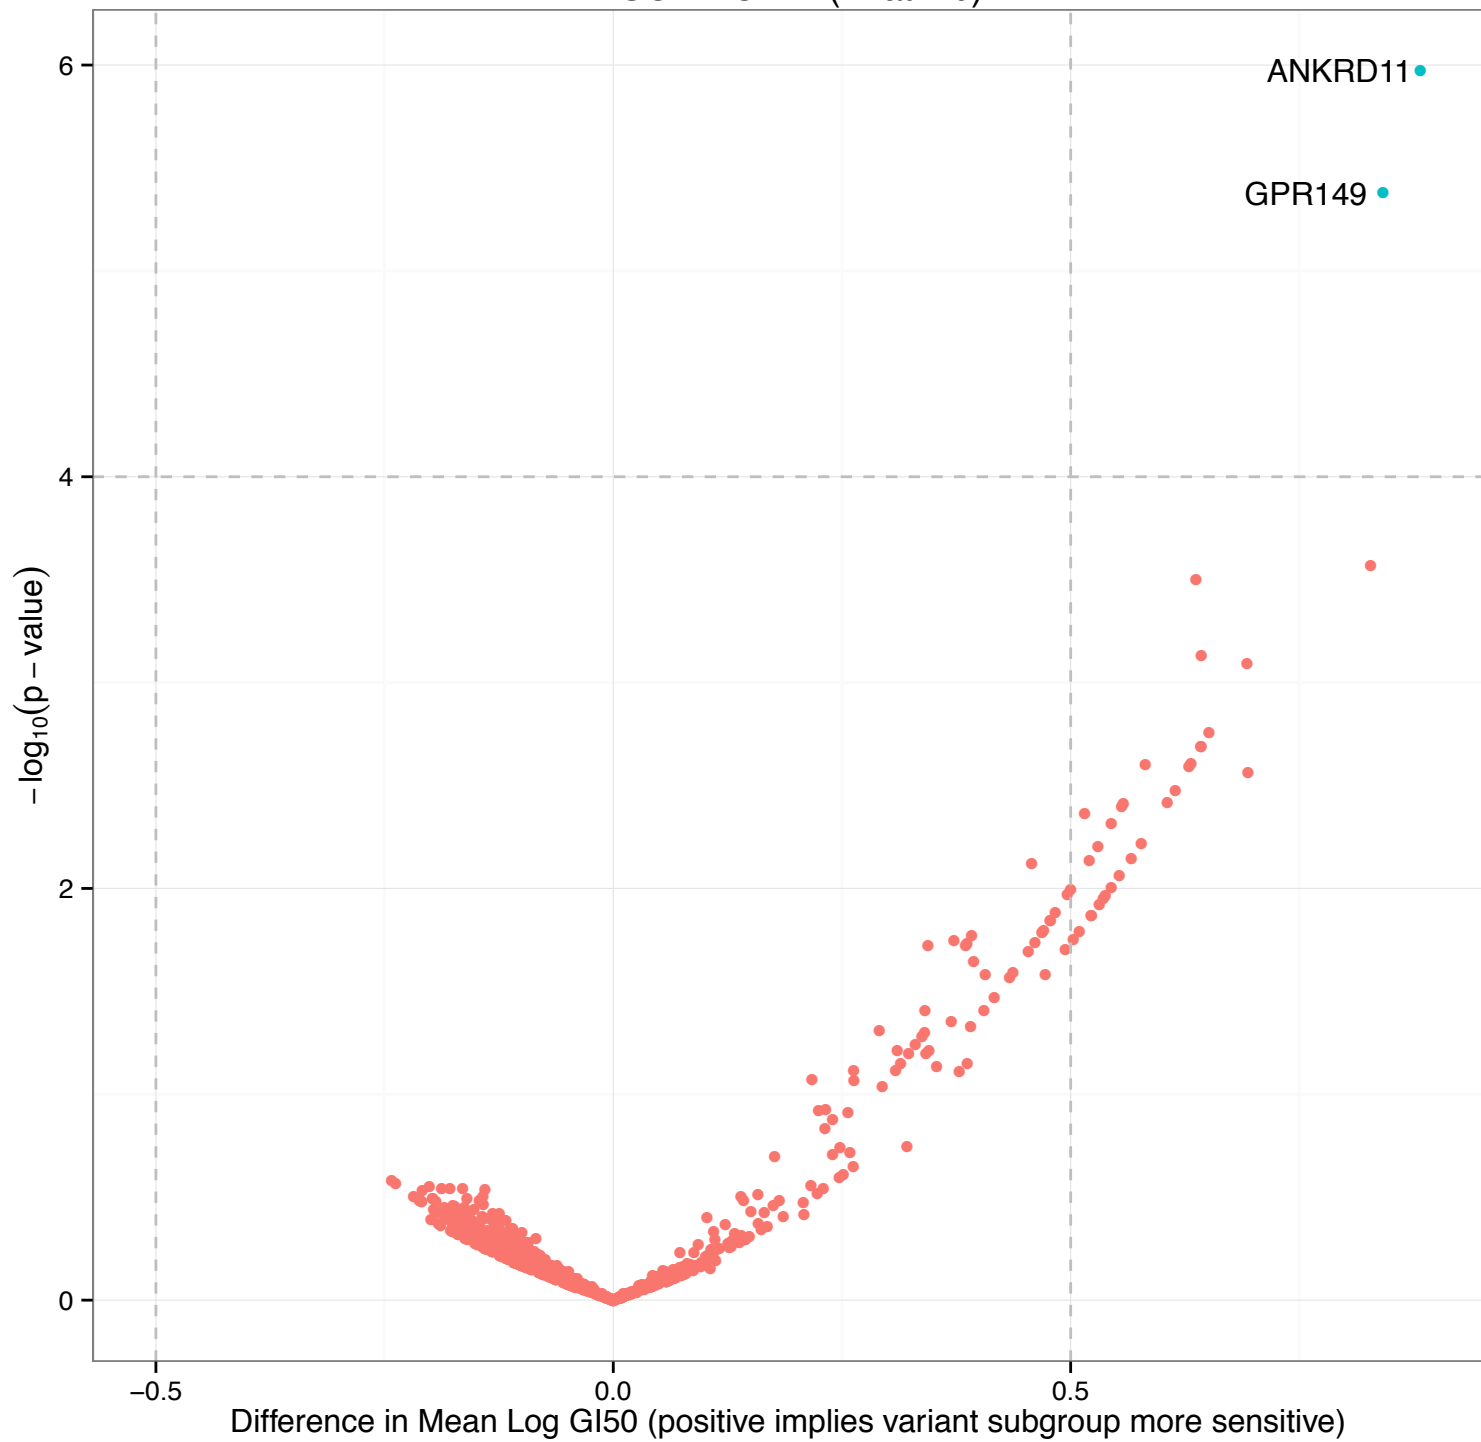



### NSC-750690 (Sunitinib)

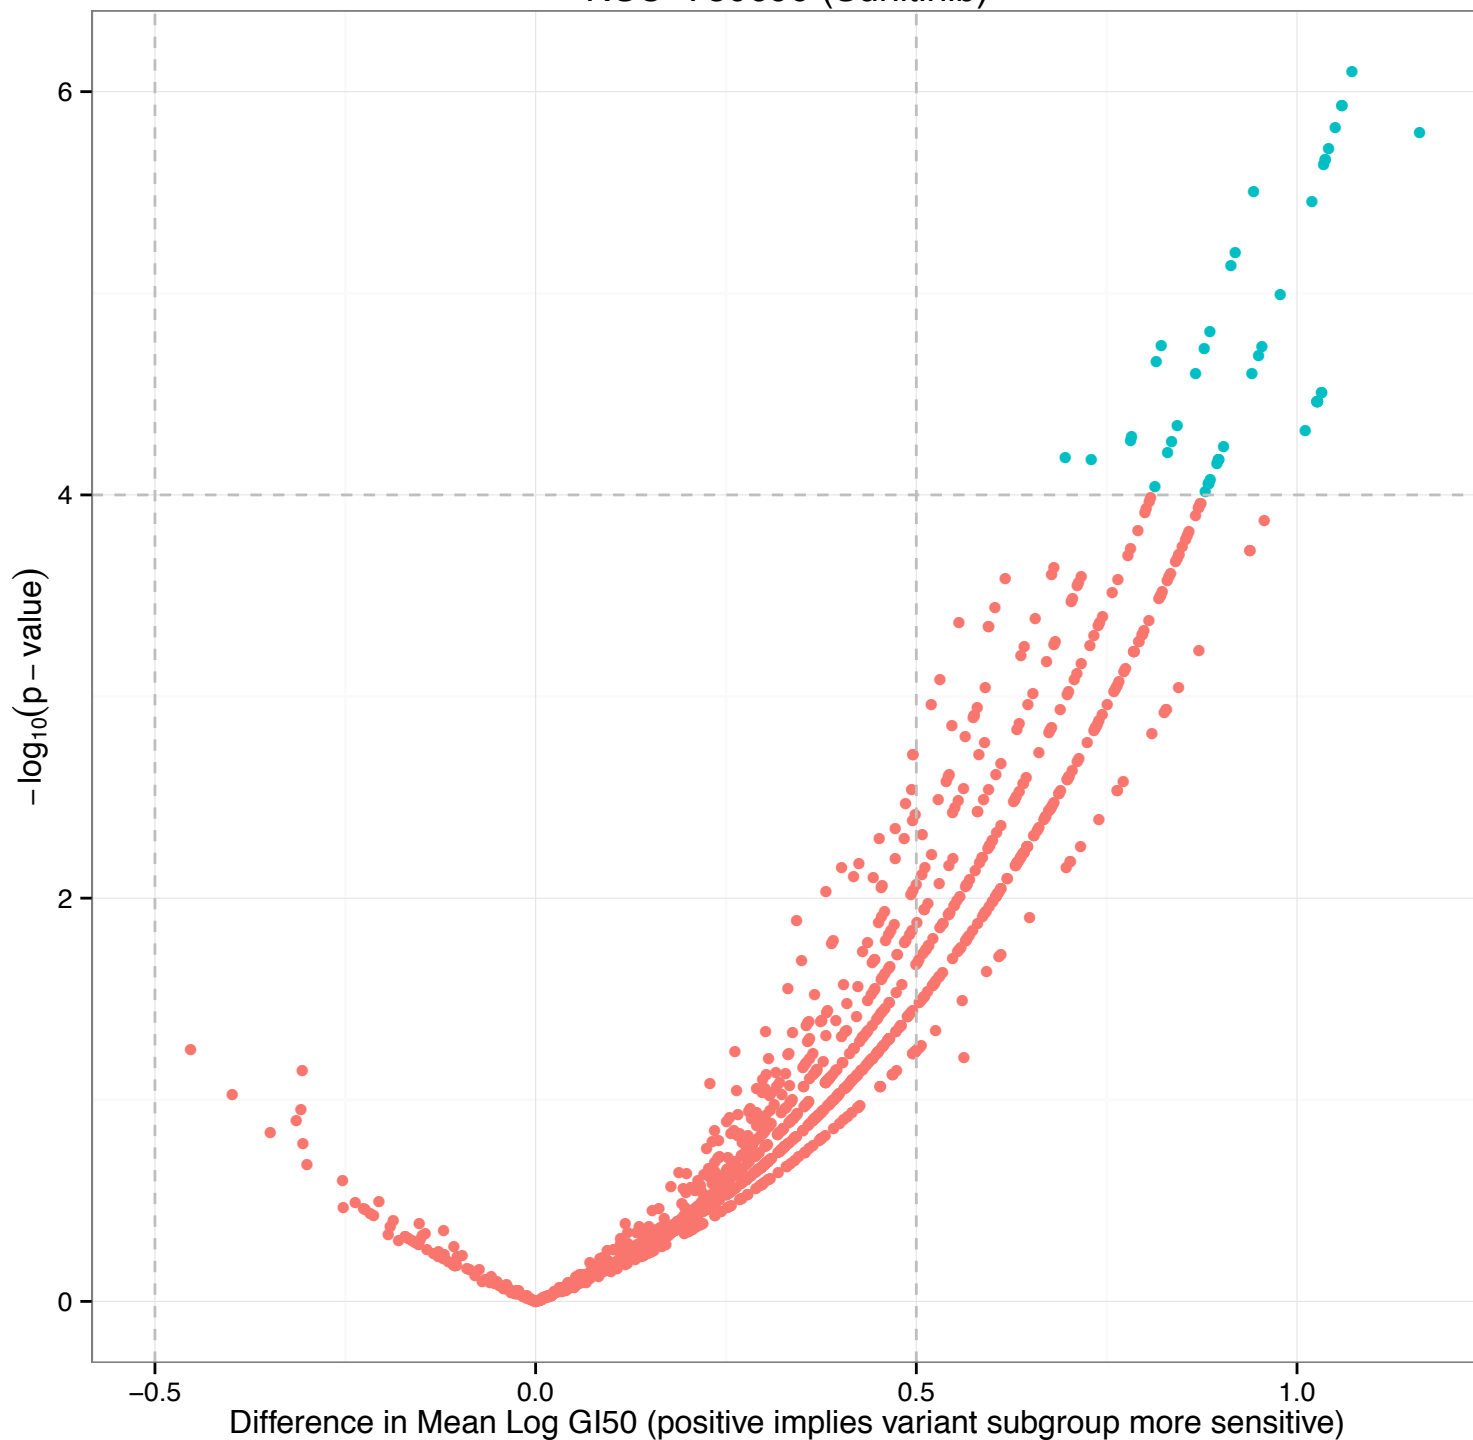

| Gene     | DM         | pValue   |
|----------|------------|----------|
| GPR114   | 1.07214815 | 7.98E-07 |
| COL6A2   | 1.05903704 | 1.17E-06 |
| UMODL1   | 1.05903704 | 1.17E-06 |
| B4GALNT3 | 1.0502963  | 1.50E-06 |
| TCP11    | 1.161      | 1.60E-06 |
| PIK3C2A  | 1.04155556 | 1.92E-06 |
| NCDN     | 1.03718519 | 2.17E-06 |
| SUPT5H   | 1.03718519 | 2.17E-06 |
| IQGAP3   | 1.035      | 2.30E-06 |
| TROAP    | 0.94320755 | 3.14E-06 |
| SF3B1    | 1.0197037  | 3.49E-06 |
| CENPE    | 0.91908805 | 6.26E-06 |
| POU4F3   | 0.91352201 | 7.31E-06 |
| TBC1D1   | 0.97818519 | 1.02E-05 |
| TSC2     | 0.88569182 | 1.55E-05 |
| CHD4     | 0.82195055 | 1.82E-05 |
| CLSPN    | 0.95414815 | 1.83E-05 |
| CELSR1   | 0.87827044 | 1.88E-05 |
| URB2     | 0.94977778 | 2.03E-05 |
| HIVEP2   | 0.81546703 | 2.18E-05 |
| DNAAF1   | 0.86713836 | 2.49E-05 |
| NPR2     | 0.94103704 | 2.50E-05 |
| FSD1     | 1.03227273 | 3.09E-05 |
| ZBTB39   | 1.03227273 | 3.09E-05 |
| CALCR    | 1.02690909 | 3.45E-05 |
| DDX58    | 1.02690909 | 3.45E-05 |
| PLD2     | 1.02690909 | 3.45E-05 |
| PRICKLE2 | 1.02690909 | 3.45E-05 |
| SEC23B   | 1.02690909 | 3.45E-05 |
| SIK2     | 1.02690909 | 3.45E-05 |
| USP49    | 0.84301887 | 4.53E-05 |
| ZMYM1    | 1.01081818 | 4.79E-05 |
| CACNA1D  | 0.78304945 | 5.14E-05 |
| COL4A3   | 0.78142857 | 5.36E-05 |
| CNOT1    | 0.83559748 | 5.42E-05 |
| EPS8     | 0.90388889 | 5.78E-05 |
| CUBN     | 0.83003145 | 6.18E-05 |
| ZNF804B  | 0.69562222 | 6.56E-05 |
| SBNO1    | 0.73002451 | 6.65E-05 |
| COL2A1   | 0.89733333 | 6.66E-05 |
| NELL2    | 0.89733333 | 6.66E-05 |
| SEC24D   | 0.89733333 | 6.66E-05 |
| DCLRE1A  | 0.89514815 | 6.98E-05 |
| SPP1     | 0.88640741 | 8.42E-05 |
| CCDC80   | 0.88422222 | 8.82E-05 |
| FHOD3    | 0.88422222 | 8.82E-05 |
| PRKG1    | 0.88422222 | 8.82E-05 |
| COL5A2   | 0.81333333 | 9.11E-05 |
| ASTN1    | 0.87985185 | 9.67E-05 |

# NSC-754345 (JNJ-28312141)

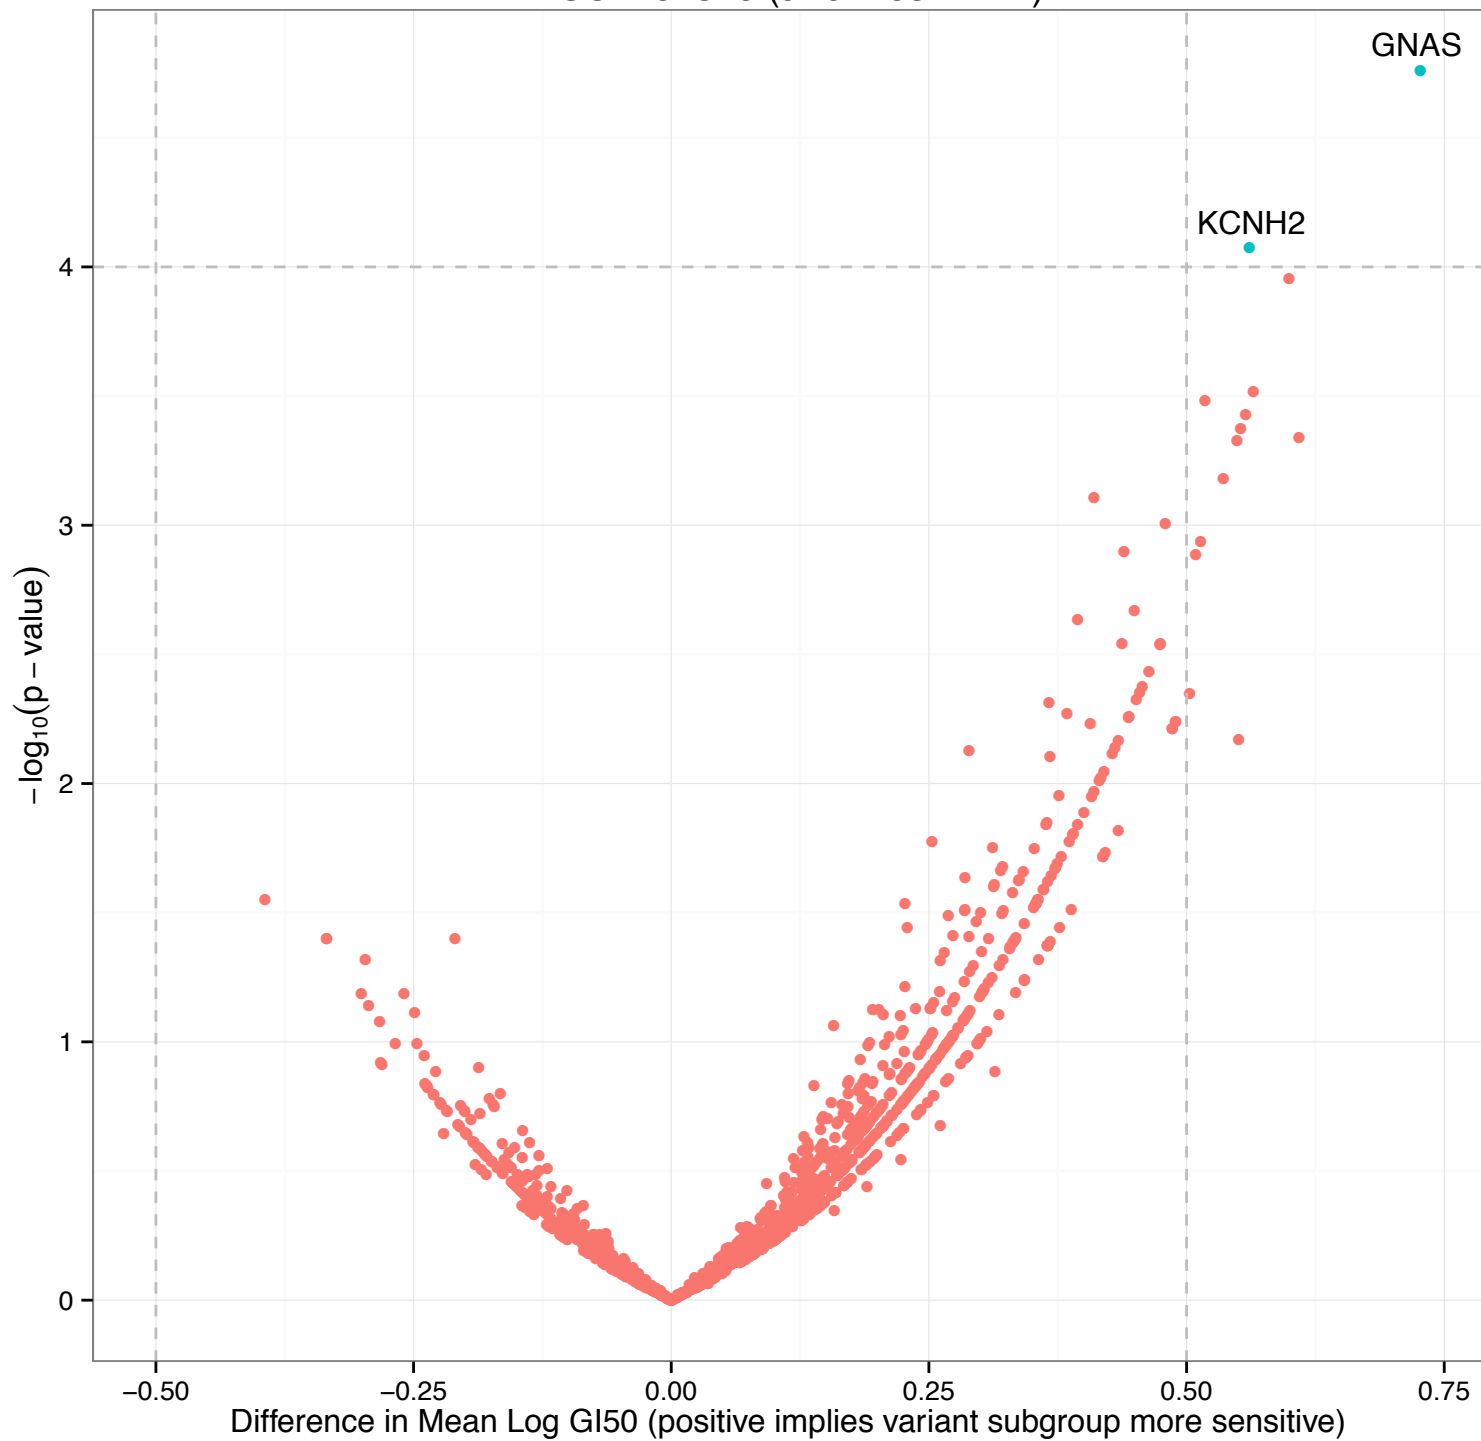

# NSC-754356 (PF-562271)

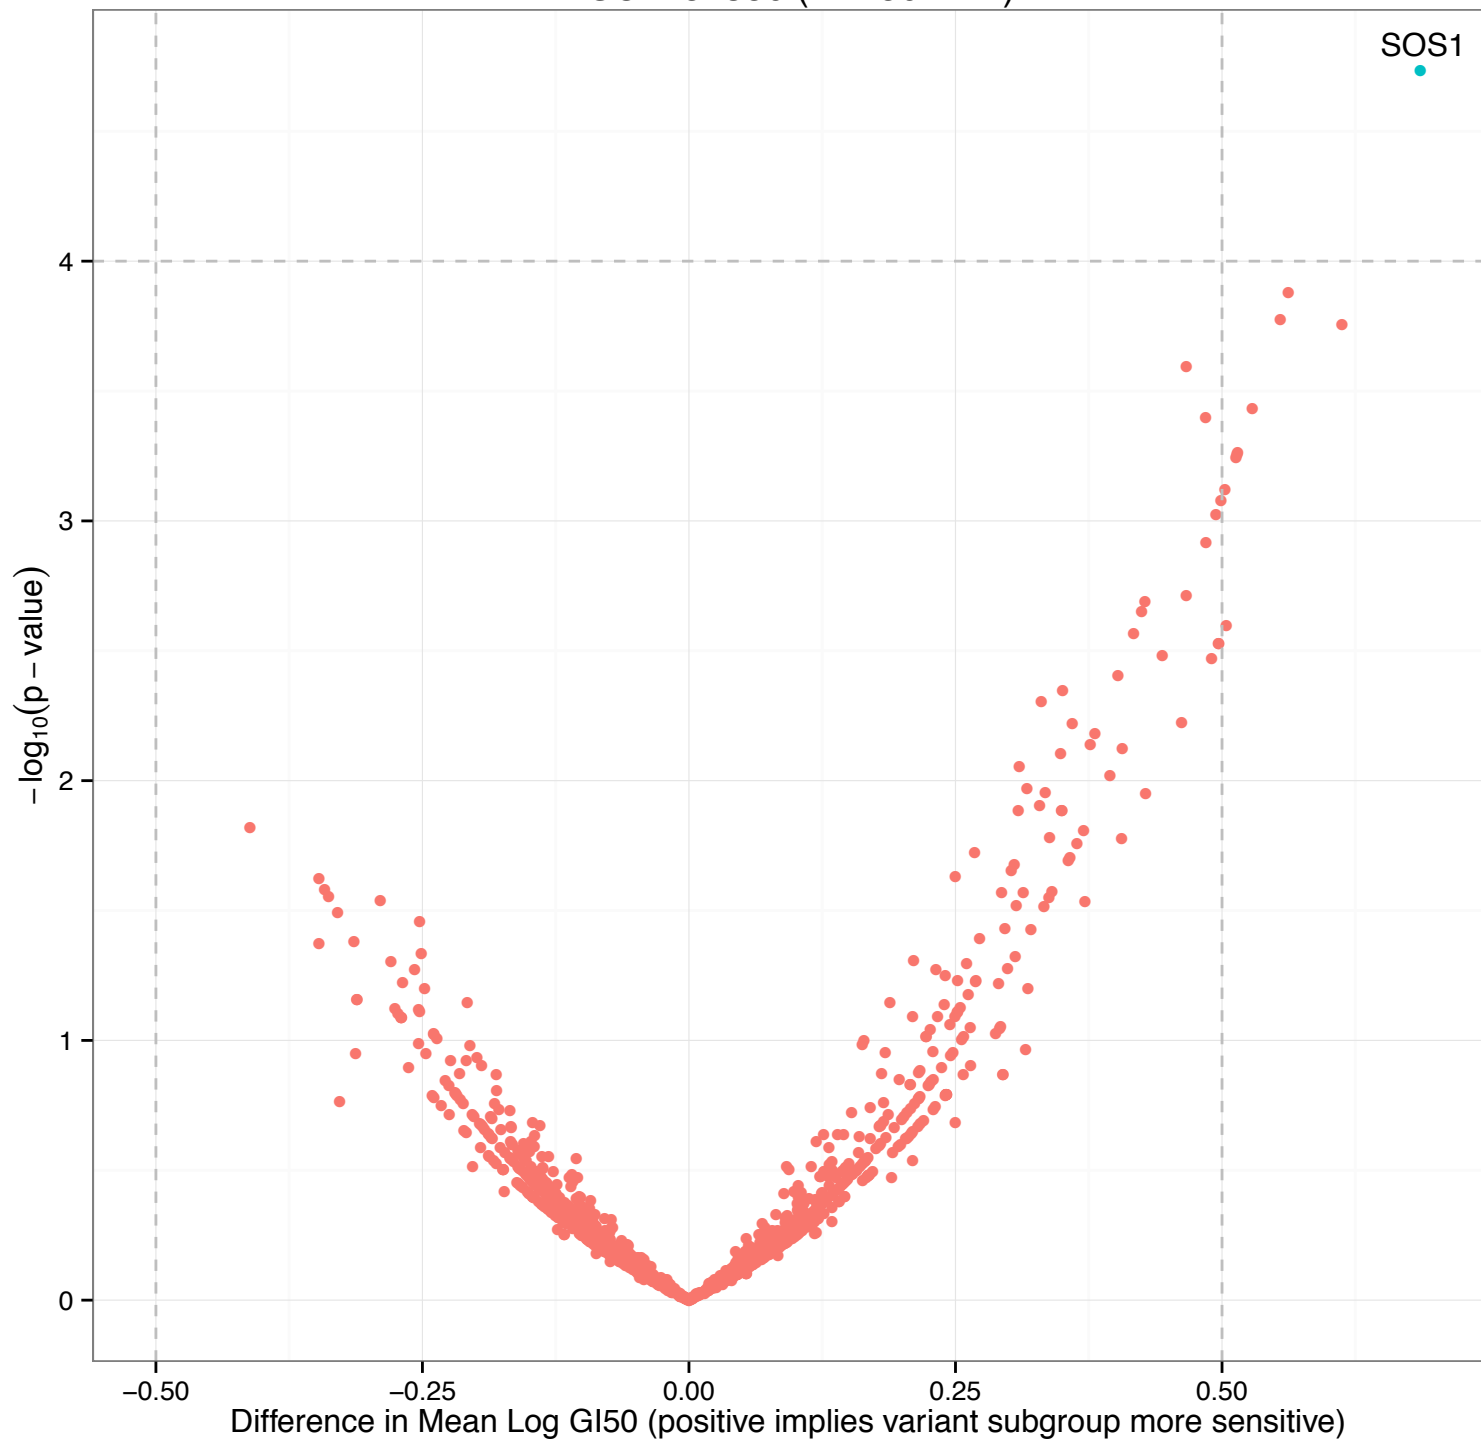

# NSC-755775 (Foretinib)

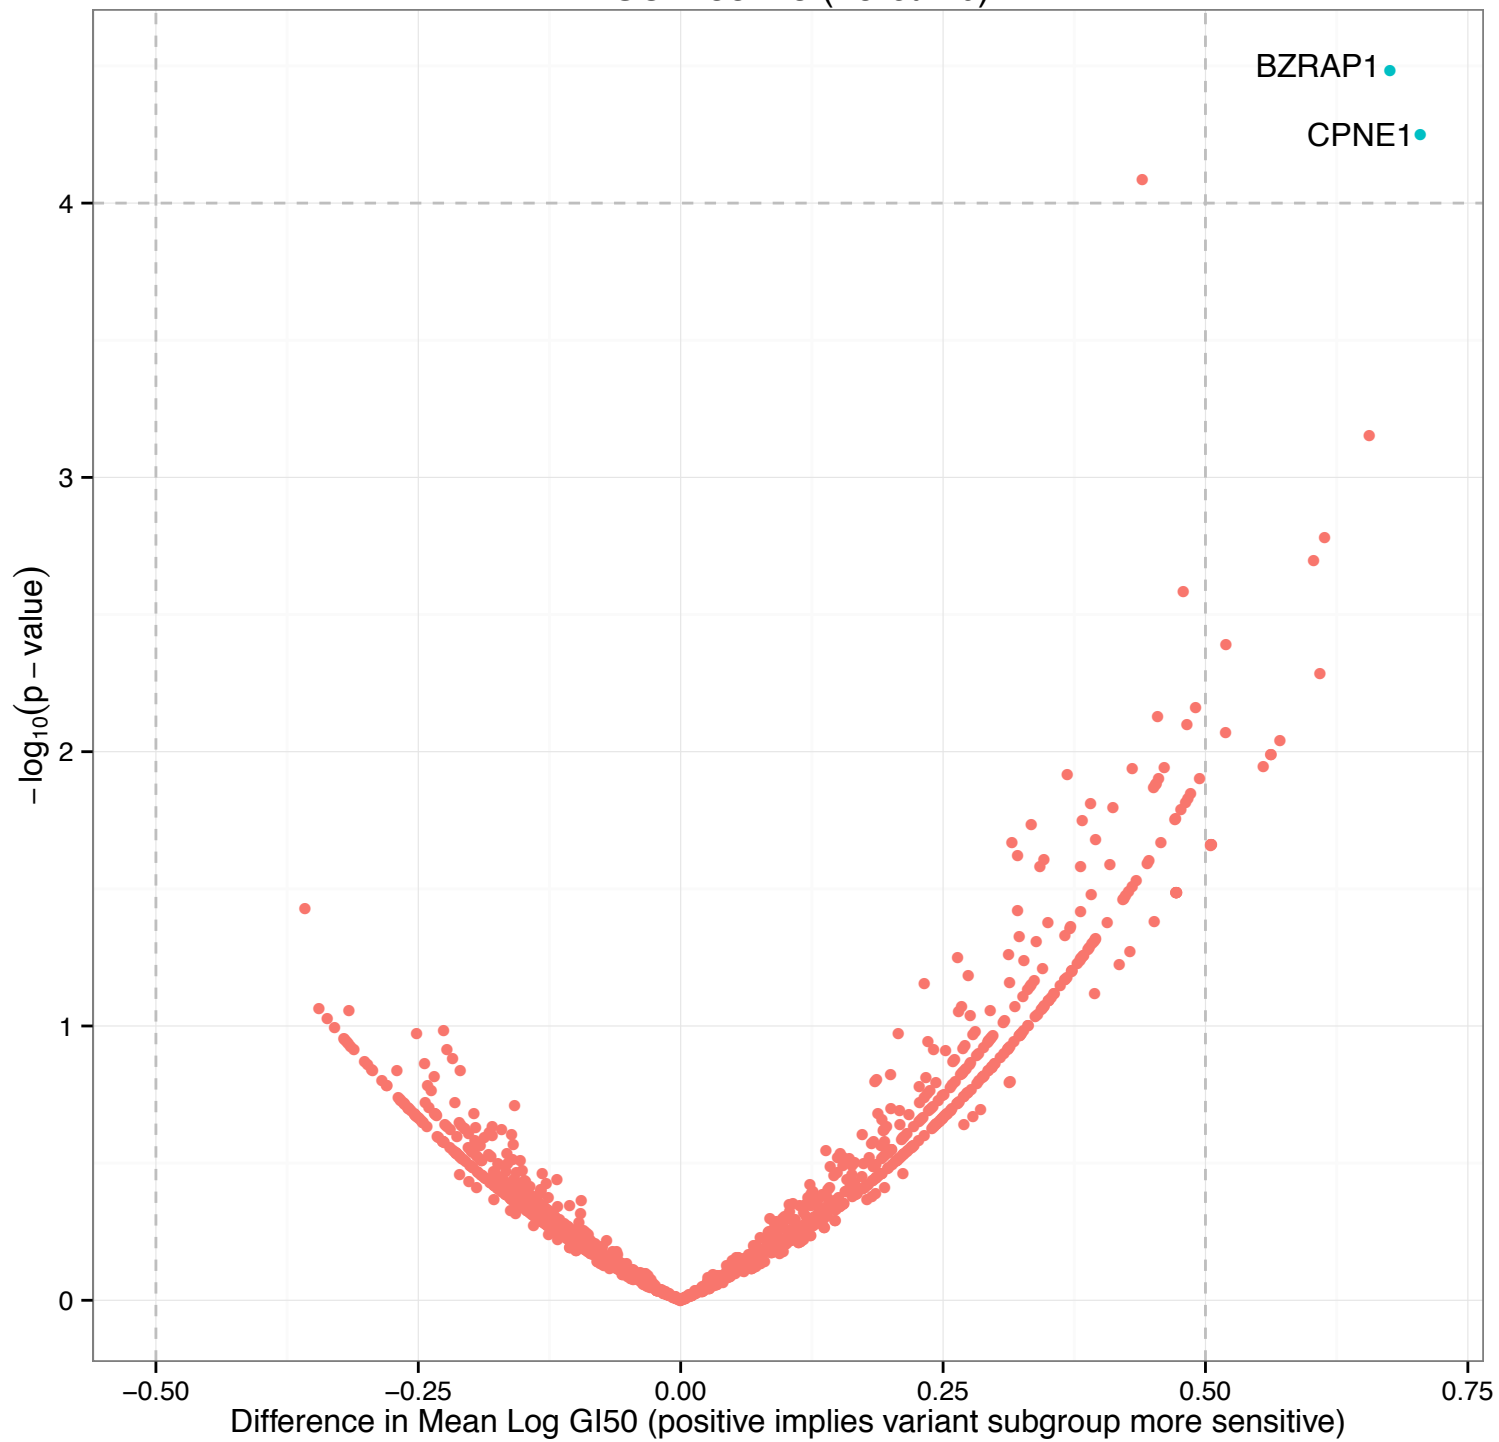

# NSC-756645 (Crizotinib (PF-02341066))

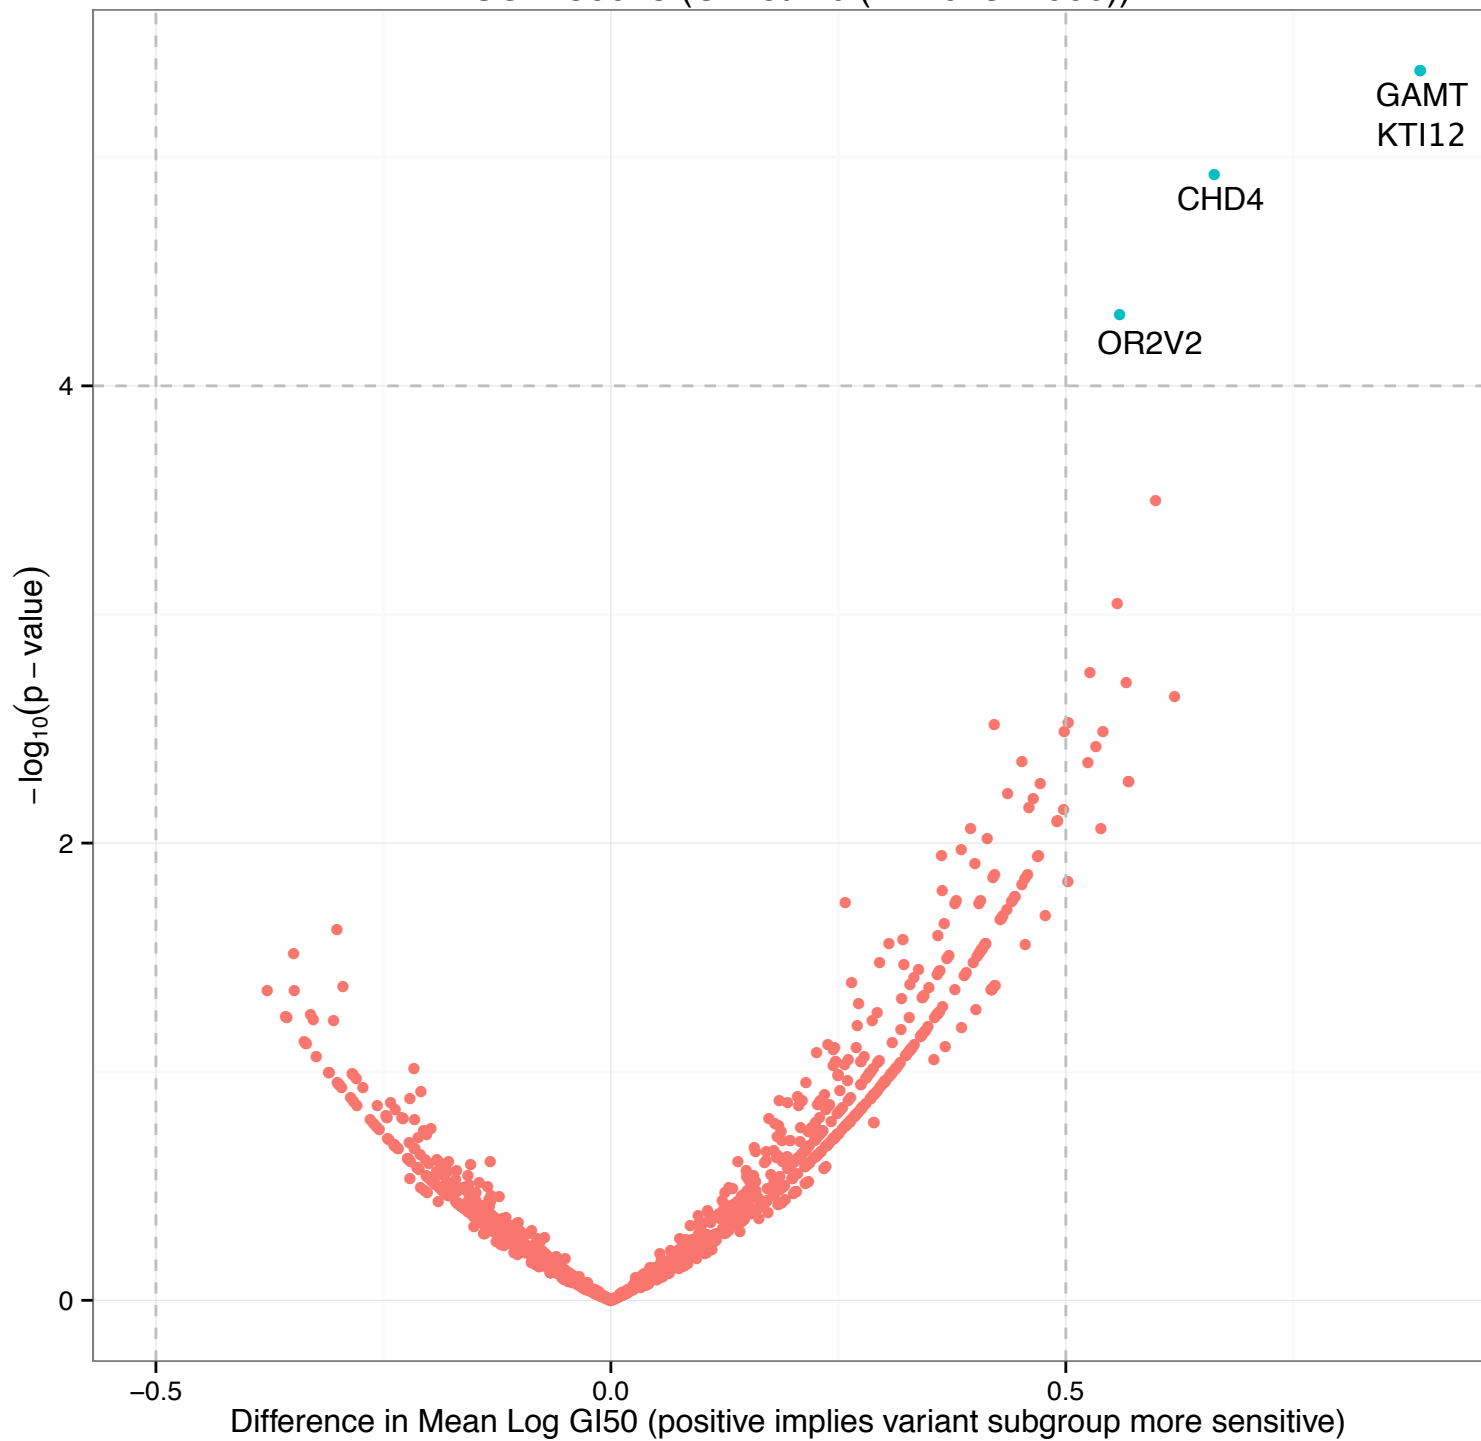

# NSC-758007 (AV-951 (Tivozanib))

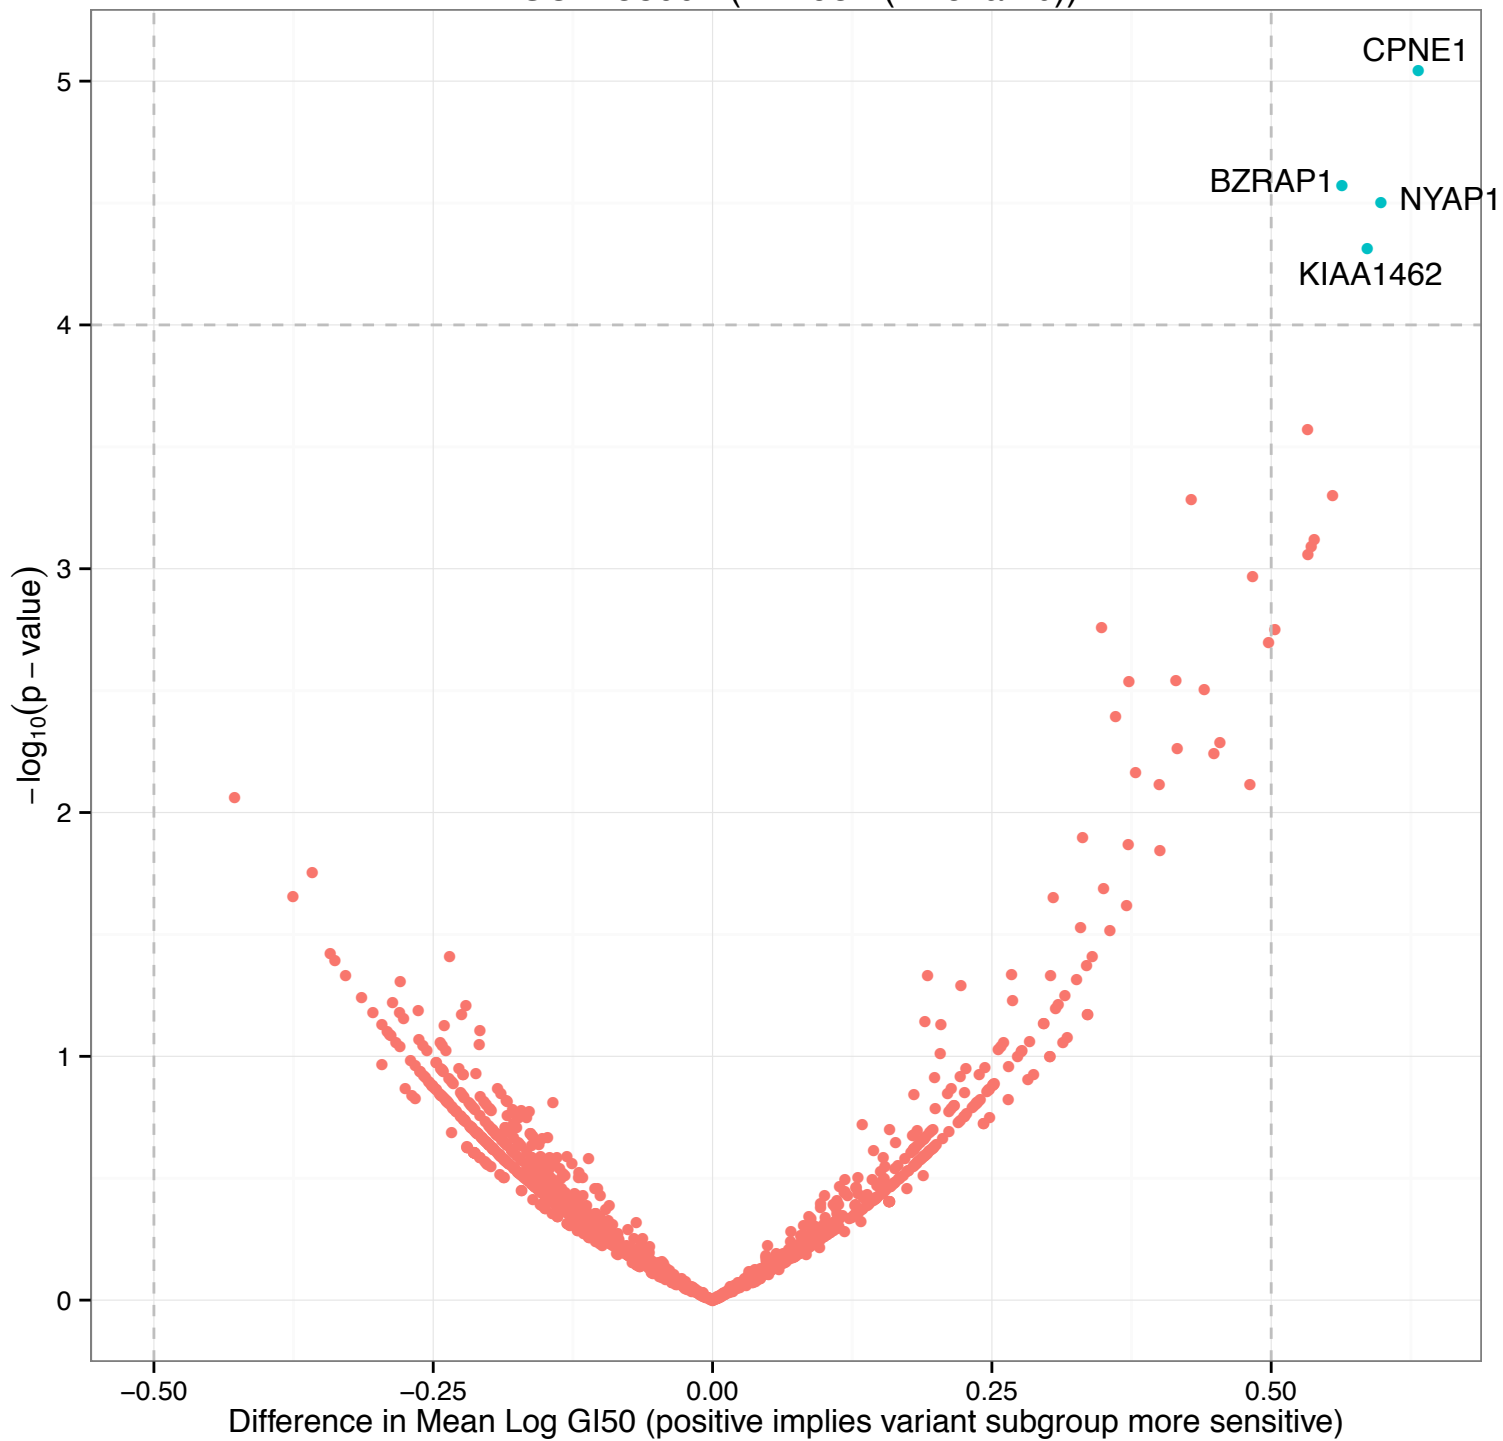

# NSC-758488 (CYT-997)

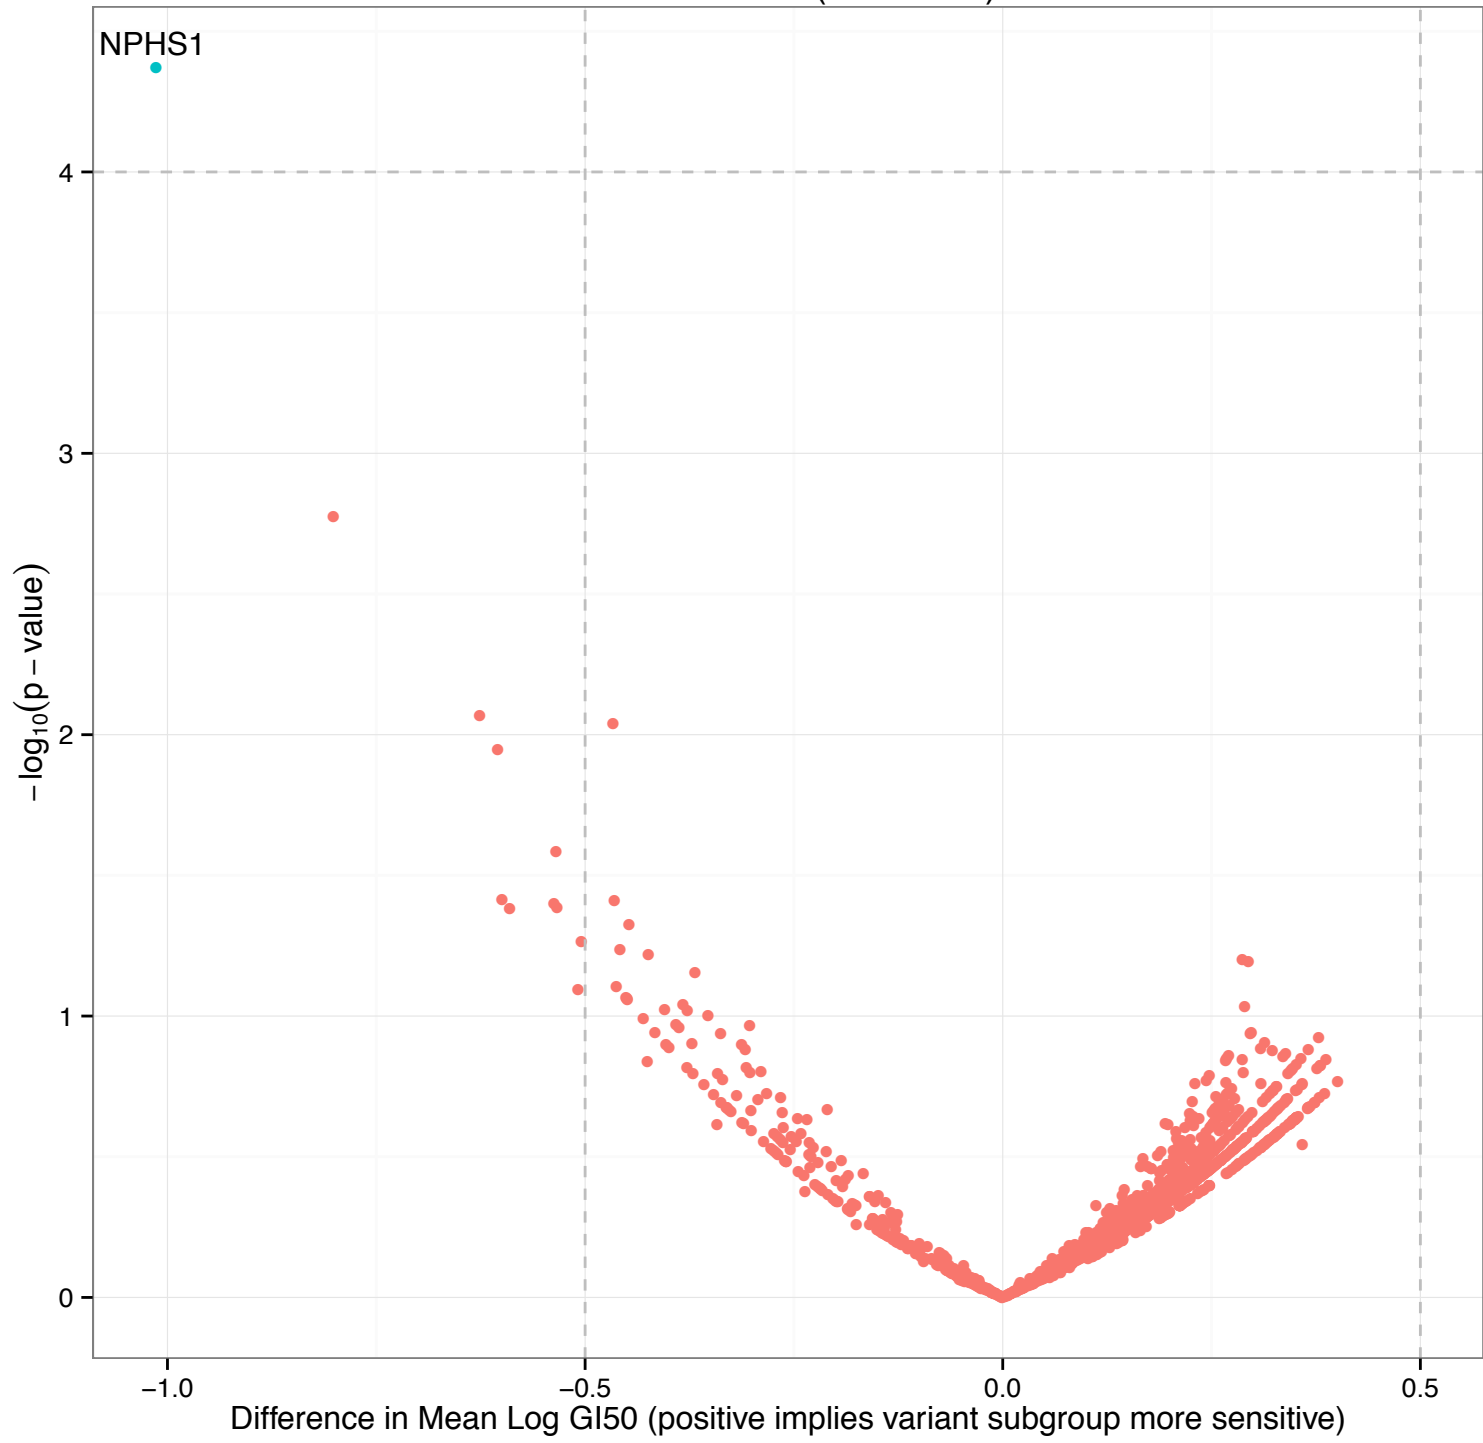

# NSC-758591 (SGX-523)

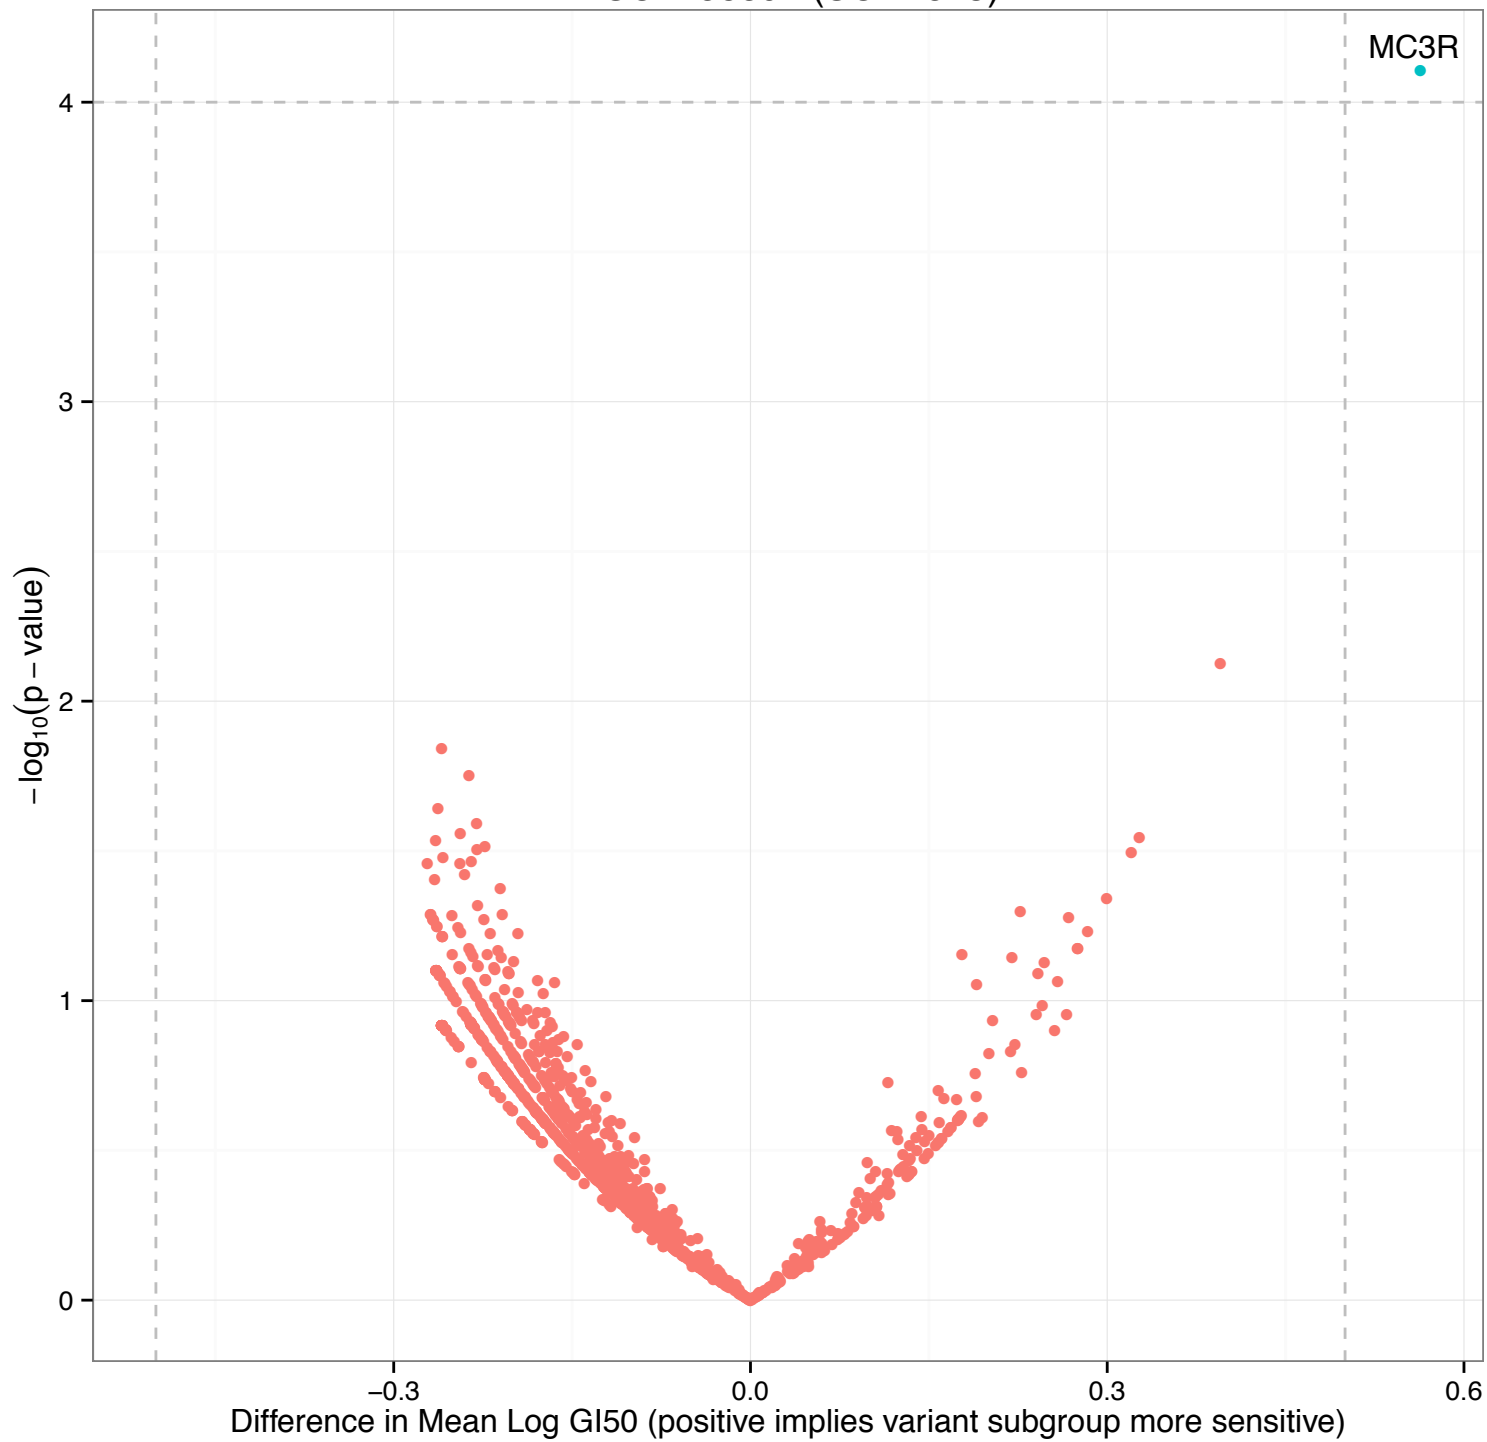



# NSC-760442 (FK-866)

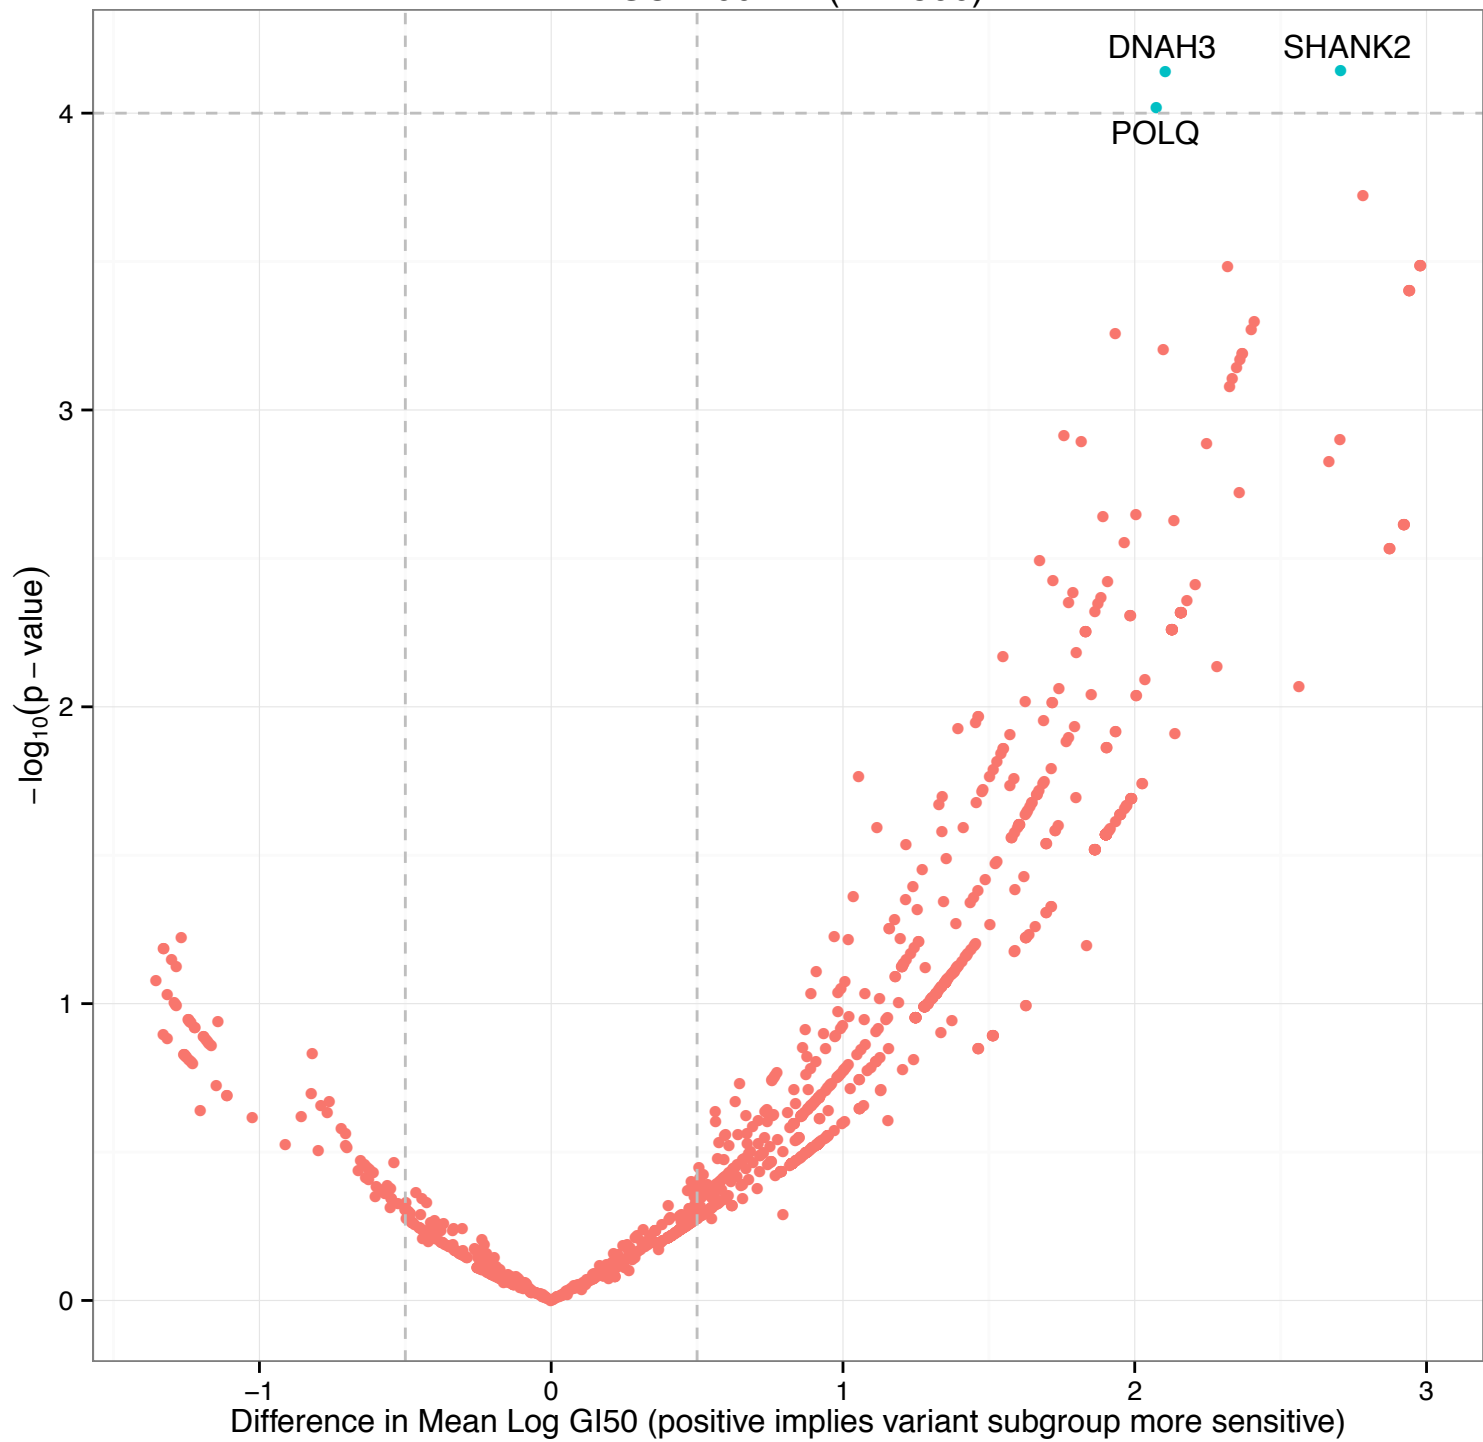

# NSC-760444 (R-115777 (tipifarnib))

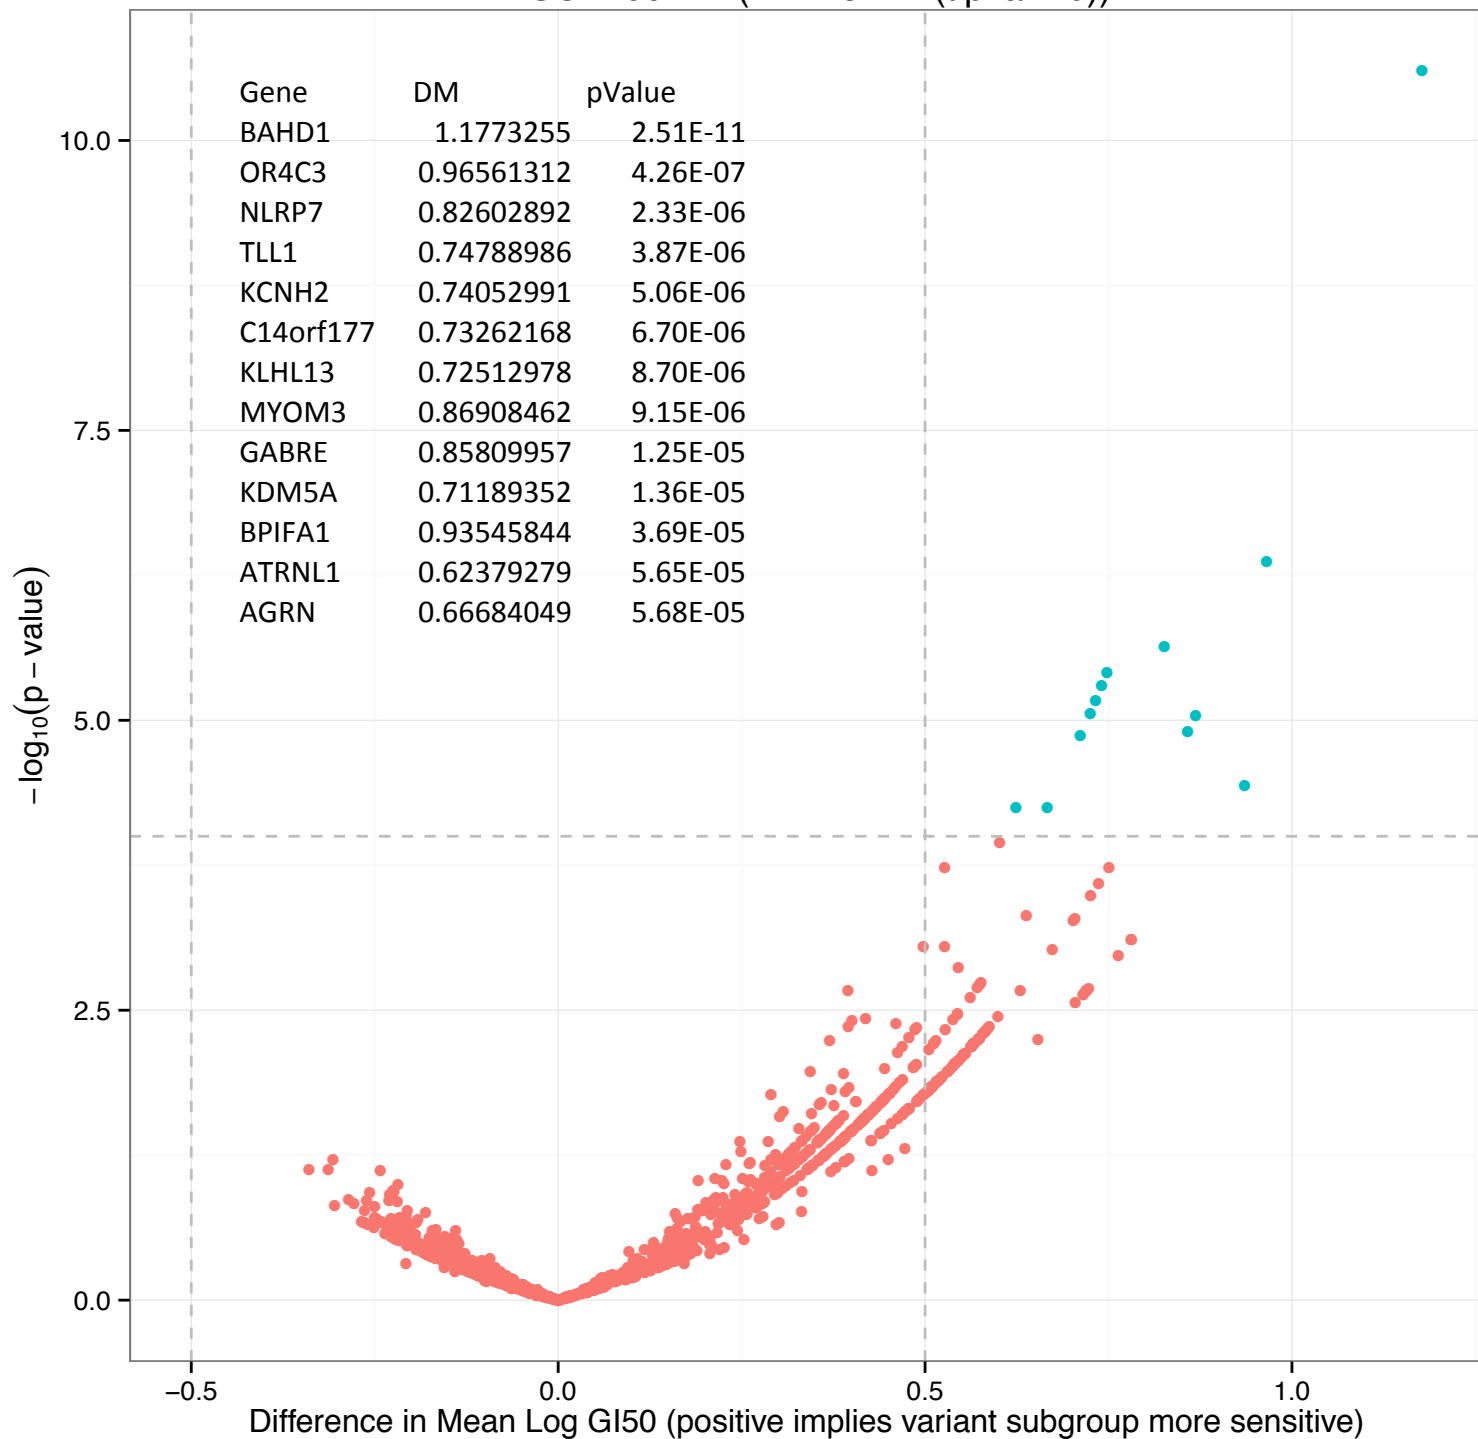

# NSC-760842 (BIM-46187)

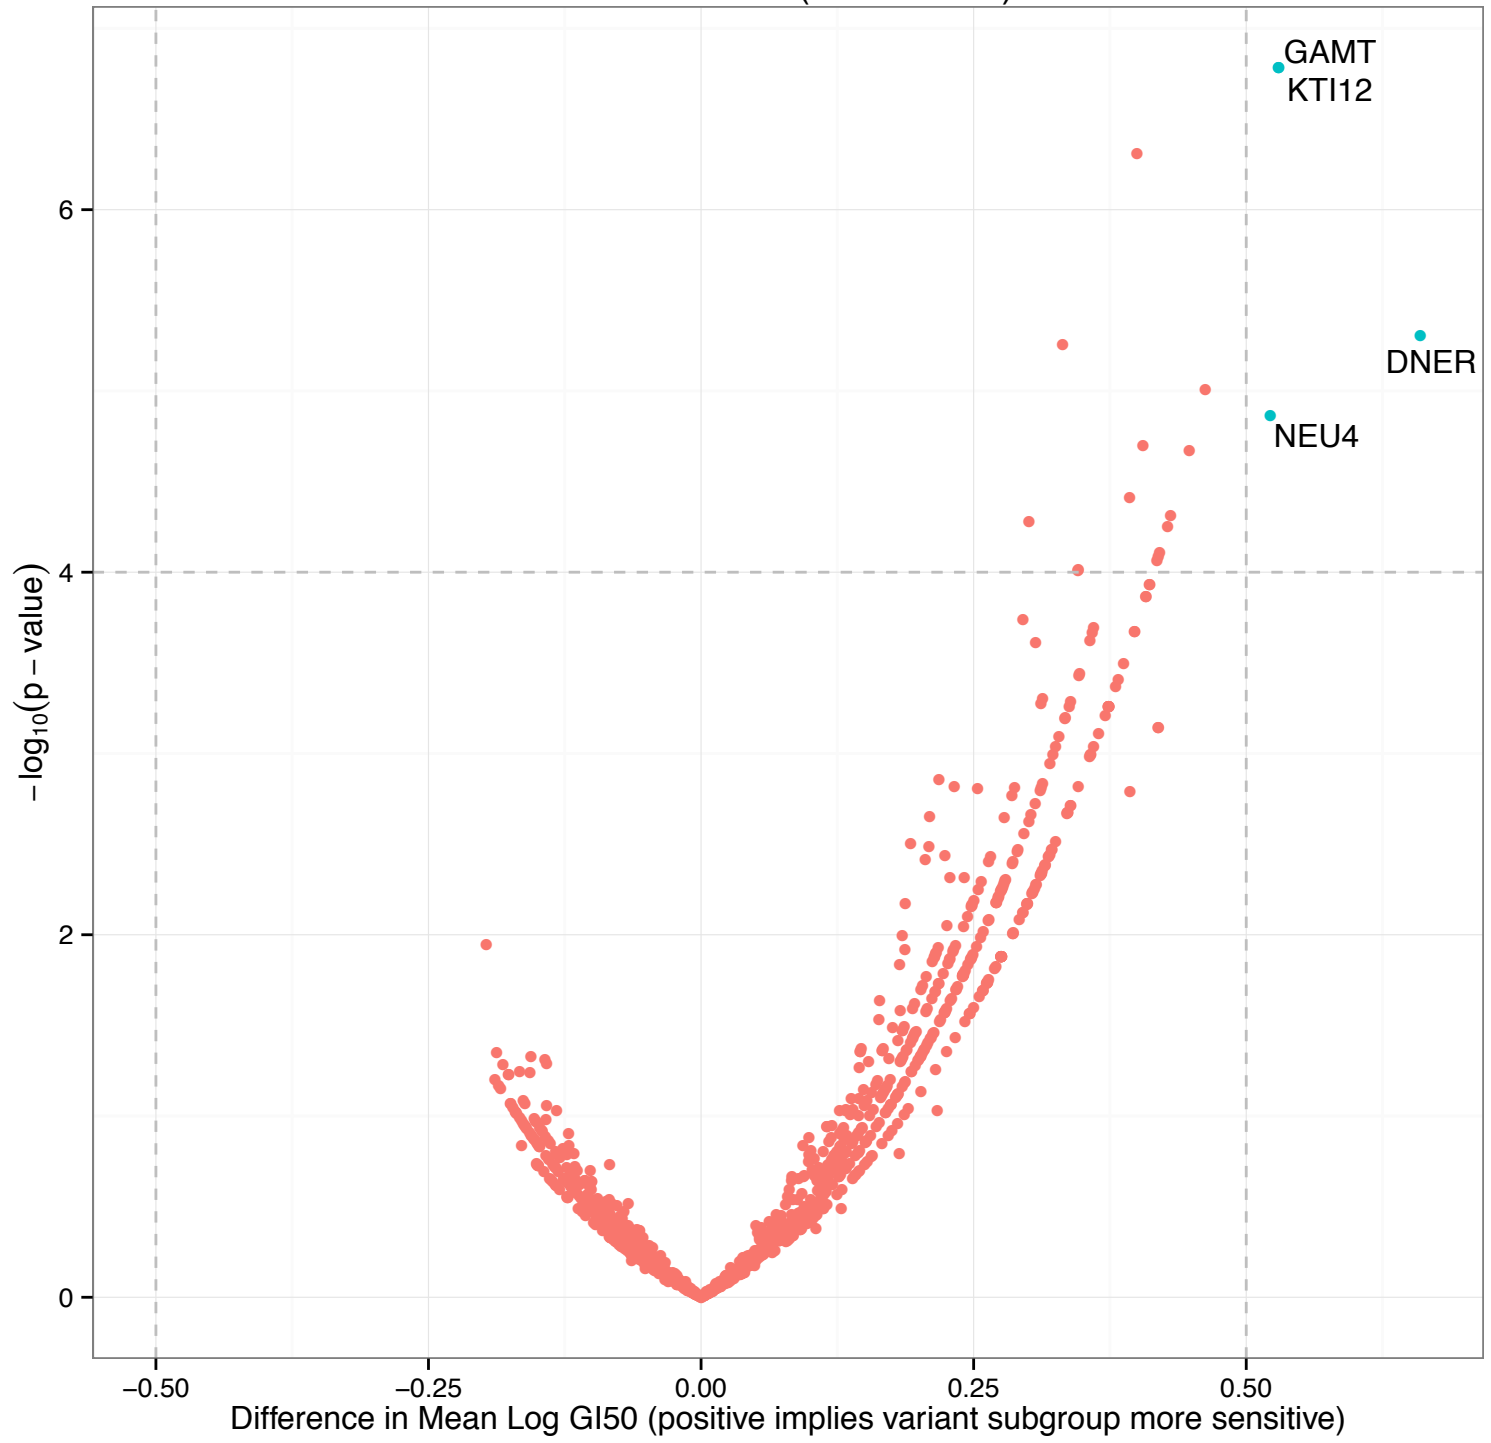

# NSC-761068 (XL-184 (Cabozantinib))

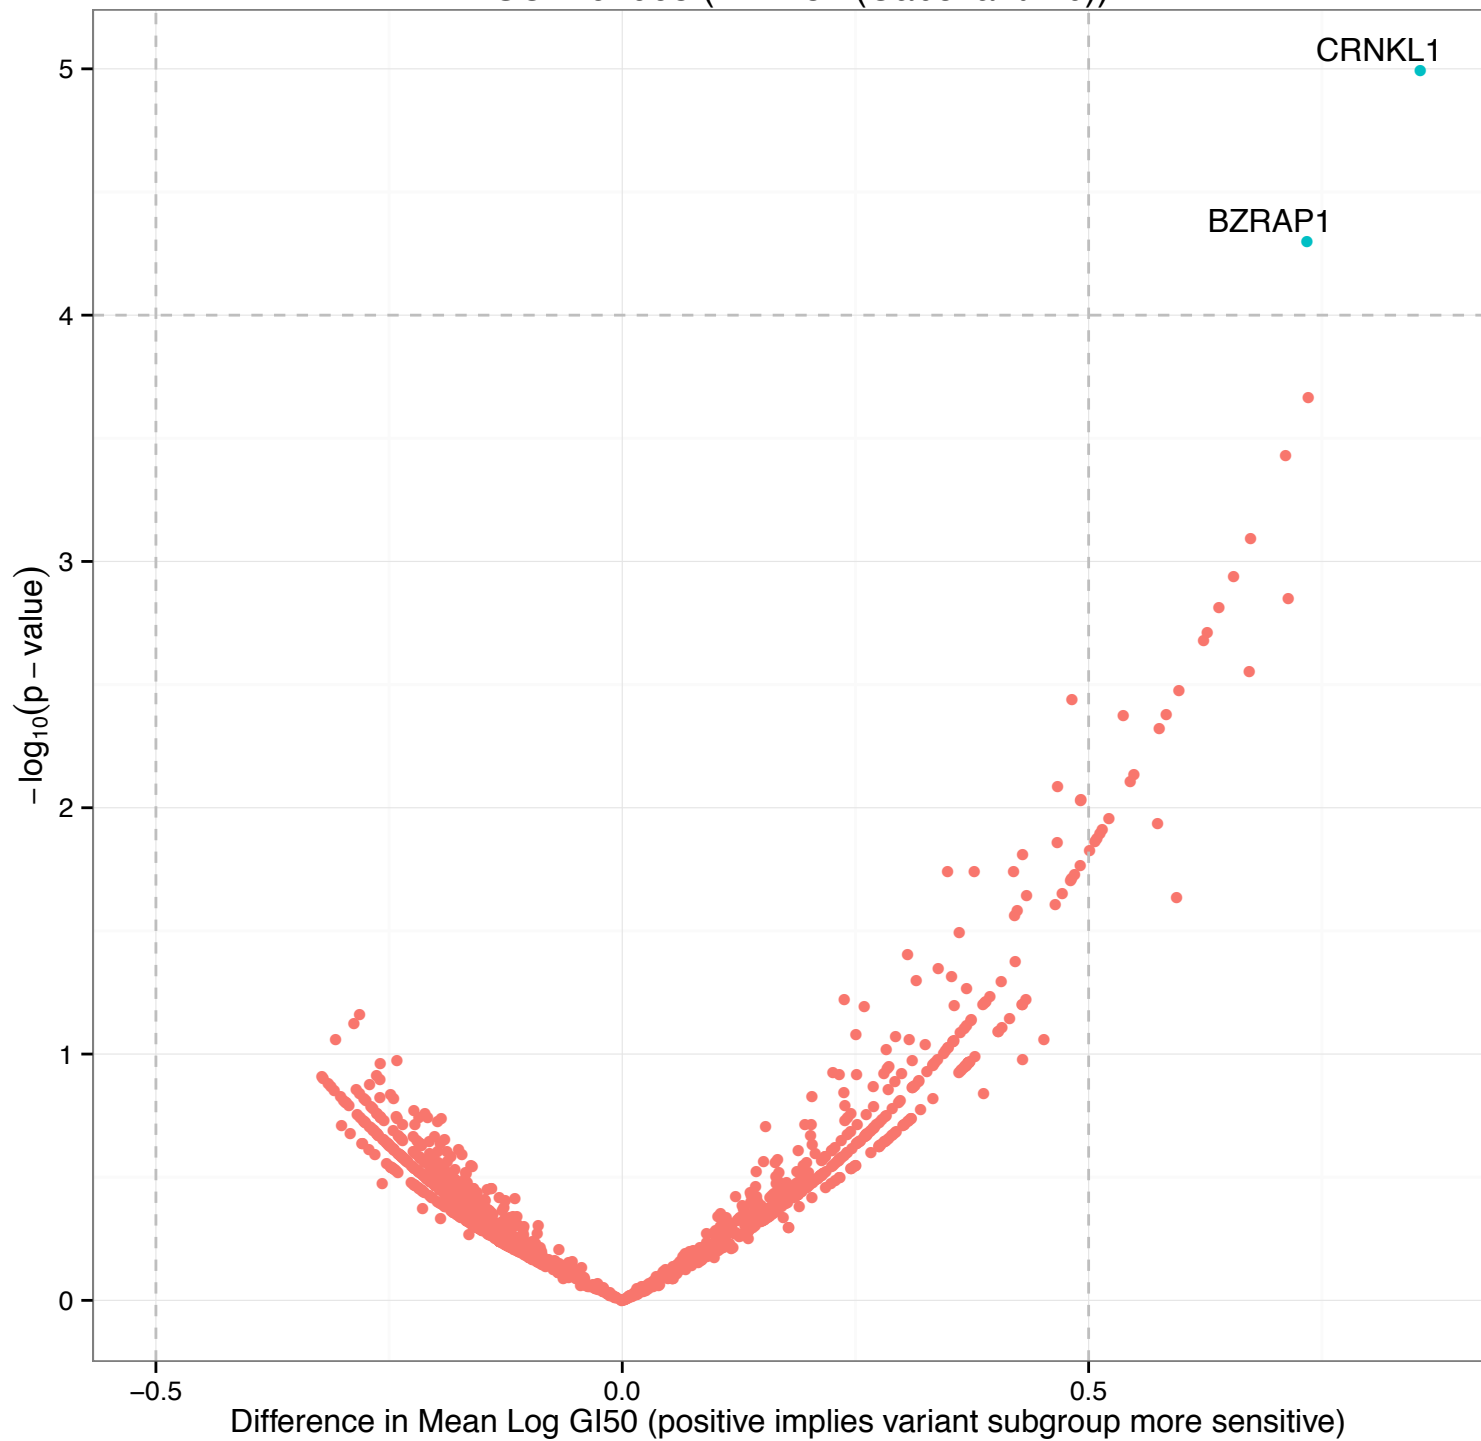

Supplement: NIHMS484230-supplement-4.pdf [file NIHMS484230-supplement-4.pdf]
